# Supplementary material for: Epidemiological evidence for a hereditary contribution to myasthenia gravis: a retrospective cohort study of patients from North America
Source: PubMed Central journal article supplement — BMJ Open. 2020 Sep 18;10(9):e037909. doi: 10.1136/bmjopen-2020-037909 (PMC7511637; doi:10.1136/bmjopen-2020-037909), 2020-09-18
Supplement: bmjopen-2020-037909.draft_revisions.pdf [file bmjopen-2020-037909.draft_revisions.pdf]

# BMJ Open

BMJ Open is committed to open peer review. As part of this commitment we make the peer review history of every article we publish publicly available.

When an article is published we post the peer reviewers' comments and the authors' responses online. We also post the versions of the paper that were used during peer review. These are the versions that the peer review comments apply to.

The versions of the paper that follow are the versions that were submitted during the peer review process. They are not the versions of record or the final published versions. They should not be cited or distributed as the published version of this manuscript.

BMJ Open is an open access journal and the full, final, typeset and author-corrected version of record of the manuscript is available on our site with no access controls, subscription charges or pay-per-view fees (<http://bmjopen.bmj.com>).

If you have any questions on BMJ Open's open peer review process please email [info.bmjopen@bmj.com](mailto:info.bmjopen@bmj.com)

# BMJ Open

## New evidence for a genetic contribution to myasthenia gravis

|                               |                                                                                                                                                                                                                                                                                                                                                                                                                                                                                                                                                                                                                                                                                                                                                                                                                                                                                                                                                                                                                                                                                                                                                                                                                                                                                                                                                                                                                                                                                                                                                                                                                                                                                                                                                                                                                                                                                                                                                                                                                                                                                                                                 |
|-------------------------------|---------------------------------------------------------------------------------------------------------------------------------------------------------------------------------------------------------------------------------------------------------------------------------------------------------------------------------------------------------------------------------------------------------------------------------------------------------------------------------------------------------------------------------------------------------------------------------------------------------------------------------------------------------------------------------------------------------------------------------------------------------------------------------------------------------------------------------------------------------------------------------------------------------------------------------------------------------------------------------------------------------------------------------------------------------------------------------------------------------------------------------------------------------------------------------------------------------------------------------------------------------------------------------------------------------------------------------------------------------------------------------------------------------------------------------------------------------------------------------------------------------------------------------------------------------------------------------------------------------------------------------------------------------------------------------------------------------------------------------------------------------------------------------------------------------------------------------------------------------------------------------------------------------------------------------------------------------------------------------------------------------------------------------------------------------------------------------------------------------------------------------|
| Journal:                      | <i>BMJ Open</i>                                                                                                                                                                                                                                                                                                                                                                                                                                                                                                                                                                                                                                                                                                                                                                                                                                                                                                                                                                                                                                                                                                                                                                                                                                                                                                                                                                                                                                                                                                                                                                                                                                                                                                                                                                                                                                                                                                                                                                                                                                                                                                                 |
| Manuscript ID                 | bmjopen-2020-037909                                                                                                                                                                                                                                                                                                                                                                                                                                                                                                                                                                                                                                                                                                                                                                                                                                                                                                                                                                                                                                                                                                                                                                                                                                                                                                                                                                                                                                                                                                                                                                                                                                                                                                                                                                                                                                                                                                                                                                                                                                                                                                             |
| Article Type:                 | Original research                                                                                                                                                                                                                                                                                                                                                                                                                                                                                                                                                                                                                                                                                                                                                                                                                                                                                                                                                                                                                                                                                                                                                                                                                                                                                                                                                                                                                                                                                                                                                                                                                                                                                                                                                                                                                                                                                                                                                                                                                                                                                                               |
| Date Submitted by the Author: | 21-Feb-2020                                                                                                                                                                                                                                                                                                                                                                                                                                                                                                                                                                                                                                                                                                                                                                                                                                                                                                                                                                                                                                                                                                                                                                                                                                                                                                                                                                                                                                                                                                                                                                                                                                                                                                                                                                                                                                                                                                                                                                                                                                                                                                                     |
| Complete List of Authors:     | <p>Green, Joshua; National Institute on Aging Intramural Research Program, Neuromuscular Diseases Research Unit, Laboratory of Neurogenetics</p> <p>Barohn, Richard; University of Kansas Medical Center, Department of Neurology</p> <p>Bartoccion, Emanuela; Catholic University, Fondazione Policlinico Universitario "A. Gemelli" - I.R.C.C.S., Institute of General Pathology</p> <p>Benetar, Michael; University of Miami, Department of Neurology</p> <p>Blackmore, Derrick; University of Alberta Hospital, Department of Medicine</p> <p>Chaudhry, Vinay; Johns Hopkins School of Medicine, Department of Neurology</p> <p>Chopra, Manisha ; University of North Carolina at Chapel Hill, Department of Neurology</p> <p>Corse, Andrea; Johns Hopkins School of Medicine, Department of Neurology</p> <p>Dimachkie, Mazen M.; University of Kansas Medical Center, Department of Neurology</p> <p>Evoli, Amelia ; Policlinico A. Gemelli IRCSS, Università Cattolica del S. Cuore, Istituto di Neurologia</p> <p>Florence , Julaine ; Washington University School of Medicine in Saint Louis, Department of Neurology</p> <p>Freimer , Miriam ; Ohio State University Medical Center, Department of Neurology</p> <p>Howard, James ; University of North Carolina at Chapel Hill, Department of Neurology</p> <p>Jiwa, Theresa; University of British Columbia, Division of Neurology</p> <p>Kaminski , Henry ; George Washington University</p> <p>Kissel, JT; Ohio State University Medical Center, Department of Neurology</p> <p>Koopman, Wilma; London Health Sciences Centre, Department of Clinical Neurosciences,</p> <p>Lipscomb, Bernadette ; Duke University Medical Center, Department of Neurology</p> <p>Maestri , Michelangelo ; University of Pisa, Department of Neuroscience</p> <p>Marino, Mariapaola ; Catholic University, Fondazione Policlinico Universitario "A. Gemelli" - I.R.C.C.S., Institute of General Pathology</p> <p>Massey, Janice; Duke University Medical Center, Department of Neurology</p> <p>McVey , April ; University of Kansas Medical Center, Department of Neurology</p> |

|           |                                                                                                                                                                                                                                                                                                                                                                                                                                                                                                                                                                                                                                                                                                                                                                                                                                                                                                                                                                                                                                                                                                                                                                                                                                                                                                                                                                                                                                                                                                                                                                                                                                                                                                                       |
|-----------|-----------------------------------------------------------------------------------------------------------------------------------------------------------------------------------------------------------------------------------------------------------------------------------------------------------------------------------------------------------------------------------------------------------------------------------------------------------------------------------------------------------------------------------------------------------------------------------------------------------------------------------------------------------------------------------------------------------------------------------------------------------------------------------------------------------------------------------------------------------------------------------------------------------------------------------------------------------------------------------------------------------------------------------------------------------------------------------------------------------------------------------------------------------------------------------------------------------------------------------------------------------------------------------------------------------------------------------------------------------------------------------------------------------------------------------------------------------------------------------------------------------------------------------------------------------------------------------------------------------------------------------------------------------------------------------------------------------------------|
|           | <p>Mezei , Michelle ; The University of British Columbia, Division of Neurology</p> <p>Muppidi , Srikanth ; Stanford University, Department of Neurology and Neurosciences</p> <p>Nicolle, Michael ; London Health Sciences Centre, Division of Neurology</p> <p>Oger, Joel; The University of British Columbia, Division of Neurology</p> <p>Pascuzzi , Robert ; Indiana University Purdue University at Indianapolis, Department of Neurology</p> <p>Pasnoor , Mamatha ; University of Kansas Medical Center, Department of Neurology</p> <p>Pestronk , Alan ; Washington University School of Medicine in Saint Louis, Department of Neurology</p> <p>Provenzano , Carlo ; Catholic University, Fondazione Policlinico Universitario "A. Gemelli" - I.R.C.C.S, Institute of General Pathology</p> <p>Ricciardi , Roberta ; University of Pisa, Department of Neuroscience</p> <p>Richman, DP; Center for Neuroscience, University of California, Neurology</p> <p>Rowin, Julie ; APAC Centers for Pain Management Wellness and Integrative Neurology</p> <p>Sanders, Donald ; Duke University Medical Center, Department of Neurology</p> <p>Siddiqi , Zaeem ; University of Alberta Hospital, Department of Medicine</p> <p>Soloway, Aimee ; University of Alberta Hospital, Department of Medicine</p> <p>Wolfe, Gil ; State University of New York at Buffalo, Department of Neurology</p> <p>Wulf, Charlie; Washington University School of Medicine in Saint Louis, Department of Neurology</p> <p>Drachman, Daniel ; Johns Hopkins School of Medicine</p> <p>Traynor, Bryan ; National Institute on Aging Intramural Research Program, Neuromuscular Diseases Research Unit, Laboratory of Neurogenetics</p> |
| Keywords: | <p>EPIDEMIOLOGY, Neuromuscular disease &lt; NEUROLOGY, GENETICS, Neurology &lt; INTERNAL MEDICINE, Neurogenetics &lt; NEUROLOGY</p>                                                                                                                                                                                                                                                                                                                                                                                                                                                                                                                                                                                                                                                                                                                                                                                                                                                                                                                                                                                                                                                                                                                                                                                                                                                                                                                                                                                                                                                                                                                                                                                   |
|           |                                                                                                                                                                                                                                                                                                                                                                                                                                                                                                                                                                                                                                                                                                                                                                                                                                                                                                                                                                                                                                                                                                                                                                                                                                                                                                                                                                                                                                                                                                                                                                                                                                                                                                                       |

SCHOLARONE™  
Manuscripts

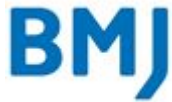

I, the Submitting Author has the right to grant and does grant on behalf of all authors of the Work (as defined in the below author licence), an exclusive licence and/or a non-exclusive licence for contributions from authors who are: i) UK Crown employees; ii) where BMJ has agreed a CC-BY licence shall apply, and/or iii) in accordance with the terms applicable for US Federal Government officers or employees acting as part of their official duties; on a worldwide, perpetual, irrevocable, royalty-free basis to BMJ Publishing Group Ltd ("BMJ") its licensees and where the relevant Journal is co-owned by BMJ to the co-owners of the Journal, to publish the Work in this journal and any other BMJ products and to exploit all rights, as set out in our [licence](#).

The Submitting Author accepts and understands that any supply made under these terms is made by BMJ to the Submitting Author unless you are acting as an employee on behalf of your employer or a postgraduate student of an affiliated institution which is paying any applicable article publishing charge ("APC") for Open Access articles. Where the Submitting Author wishes to make the Work available on an Open Access basis (and intends to pay the relevant APC), the terms of reuse of such Open Access shall be governed by a Creative Commons licence – details of these licences and which [Creative Commons](#) licence will apply to this Work are set out in our licence referred to above.

Other than as permitted in any relevant BMJ Author's Self Archiving Policies, I confirm this Work has not been accepted for publication elsewhere, is not being considered for publication elsewhere and does not duplicate material already published. I confirm all authors consent to publication of this Work and authorise the granting of this licence.

## New evidence for a genetic contribution to myasthenia gravis

Joshua D. Green, BS; Richard J. Barohn, MD; Emanuela Bartoccion, PhD; Michael Benetar, MD, PhD; Derrick Blackmore, BSc; Vinay Chaudhry, MD; Manisha Chopra, MD; Andrea Corse, MD; Mazen M. Dimachkie, MD; Amelia Evoli, MD; Julaine Florence, PT, MHS, DPT; Miriam Freimer, MD; James F. Howard Jr, MD; Theresa Jiwa; Henry J. Kaminski, MD; John Kissel, MD; Wilma J. Koopman, RN; Bernadette Lipscomb, RN; Michelangelo Maestri, MD; Mariapaola Marino, MD; Janice M. Massey, MD; April McVey, MD; Michelle M. Mezei, MD; Srikanth Muppidi, MD; Michael W. Nicolle, MD; Joel Oger, MD; Mamatha Pasnoor, MD; Alan Pestronk, MD; Carlo Provenzano, MD, PhD; Roberta Ricciardi, MD; David P. Richman, MD; Julie Rowin, MD; Donald B. Sanders, MD; Zaeem Siddiqi, MD; Aimee Soloway, RN; Gil I. Wolfe, MD; Charlie Wulf, BS; Daniel B. Drachman, MD\*; and Bryan J. Traynor, MD, PhD\*

\* These authors contributed equally to the manuscript.

**Author Contributions:** The study concept and design was proposed by DBD and BJT. The acquisition, analysis, and/or interpretation of data provided done by all authors. The manuscript was drafted by JDG and BJT. Critical revisions and intellectual contributions was provided by all authors. The statistical analysis for this study was provided by JDG.

### Affiliations

Joshua D. Green, Neuromuscular Diseases Research Unit, Laboratory of Neurogenetics, National Institute on Aging, National Institutes of Health, Porter Neuroscience Research Center, Bethesda, Maryland

1  
2  
3 Richard J. Barohn, Department of Neurology, University of Kansas Medical Center,  
4  
5 Kansas City  
6

7  
8 Emanuela Bartoccion, Institute of General Pathology, Catholic University, Fondazione  
9  
10 Policlinico Universitario "A. Gemelli" - I.R.C.C.S, Rome, Italy.  
11

12 Michael Benetar, Department of Neurology, University of Miami, Miami, Florida  
13

14  
15 Derrick Blackmore, Department of Medicine, University of Alberta Hospital, Edmonton,  
16  
17 Alberta, Canada  
18

19  
20 Vinay Chaudhry, Department of Neurology, Johns Hopkins School of Medicine,  
21  
22 Baltimore, Maryland  
23

24 Manisha Chopra, Department of Neurology, University of North Carolina, Chapel Hill  
25

26  
27 Andrea Corse, Department of Neurology, Johns Hopkins School of Medicine, Baltimore,  
28  
29 Maryland  
30

31  
32 Mazen M. Dimachkie, Department of Neurology, University of Kansas Medical Center,  
33  
34 Kansas City, Kansas  
35

36  
37 Amelia Evoli, Istituto di Neurologia, Policlinico A. Gemelli IRCSS, Università Cattolica  
38  
39 del S. Cuore, Roma, Italy  
40

41  
42 Julaine Florence, Department of Neurology, Washington University School of Medicine,  
43  
44 St Louis, Missouri  
45

46  
47 Miriam Freimer, Department of Neurology, Ohio State University Medical Center,  
48  
49 Columbus  
50

51  
52 James F. Howard Jr, Department of Neurology, University of North Carolina, Chapel Hill  
53

54  
55 Theresa Jiwa, Division of Neurology, University of British Columbia, Vancouver, British  
56  
57 Columbia, Canada  
58  
59

1  
2  
3 Henry J. Kaminski, Department of Neurology, George Washington University,  
4  
5 Washington, DC  
6

7 John Kissel, Department of Neurology, Ohio State University Medical Center, Columbus  
8  
9

10 Wilma J. Koopman, Department of Clinical Neurosciences, London Health Sciences  
11  
12 Centre, London, Ontario, Canada  
13

14 Bernadette Lipscomb, Department of Neurology, Duke University Medical Center,  
15  
16 Durham, North Carolina  
17

18 Michelangelo Maestri, Department of Neuroscience, Cisanello Hospital, University of  
19  
20 Pisa, Pisa, Italy  
21  
22

23 Mariapaola Marino, Institute of General Pathology, Catholic University, Fondazione  
24  
25 Policlinico Universitario "A. Gemelli" - I.R.C.C.S, Rome, Italy.  
26  
27

28 Janice M. Massey, Department of Neurology, Duke University Medical Center, Durham,  
29  
30 North Carolina  
31  
32

33 April McVey, Department of Neurology, University of Kansas Medical Center, Kansas  
34  
35 City  
36  
37

38 Michelle M. Mezei, Division of Neurology, University of British Columbia, Vancouver,  
39  
40 British Columbia, Canada  
41

42 Srikanth Muppidi, Clinical Associate Professor, Dept of Neurology and Neurosciences.  
43  
44 Stanford University  
45

46 Michael W. Nicolle, Department of Clinical Neurosciences, London Health Sciences  
47  
48 Centre, London, Ontario, Canada  
49

50 Joel Oger, Division of Neurology, University of British Columbia, Vancouver, British  
51  
52 Columbia, Canada  
53  
54  
55  
56  
57  
58  
59  
60

1  
2  
3 Robert M. Pascuzzi, Department of Neurology, Indiana University–Purdue University,  
4 Indianapolis  
5

6  
7 Mamatha Pasnoor, Department of Neurology, University of Kansas Medical Center,  
8 Kansas City  
9

10  
11 Alan Pestronk, Department of Neurology, Washington University School of Medicine, St  
12 Louis, Missouri  
13

14  
15 Carlo Provenzano, Institute of General Pathology, Catholic University, Fondazione  
16 Policlinico Universitario "A. Gemelli" - I.R.C.C.S, Rome, Italy.  
17

18  
19 Roberta Ricciardi, Department of Neuroscience, Cisanello Hospital, University of Pisa,  
20 Pisa, Italy  
21

22  
23 David P. Richman, Department of Neurology, University of California, Davis  
24

25  
26 Julie Rowin, APAC Centers for Pain Management Wellness and Integrative Neurology  
27 Westchester, Illinois  
28

29  
30 Donald B. Sanders, Department of Neurology, Duke University Medical Center,  
31 Durham, North Carolina  
32

33  
34 Zaeem Siddiqi, Department of Medicine, University of Alberta Hospital, Edmonton,  
35 Alberta, Canada  
36

37  
38 Aimee Soloway, Department of Medicine, University of Alberta Hospital, Edmonton,  
39 Alberta, Canada  
40

41  
42 Gil I. Wolfe, Department of Neurology, University at Buffalo Jacobs SMBS, State  
43 University of New York, Buffalo  
44

45  
46 Charlie Wulf, Department of Neurology, Washington University School of Medicine, St  
47 Louis, Missouri  
48



1  
2  
3 Daniel Drachman, Department of Neurology, Johns Hopkins School of Medicine,  
4  
5 Baltimore, Maryland  
6

7  
8 Bryan J. Traynor, Neuromuscular Diseases Research Unit, Laboratory of  
9  
10 Neurogenetics, National Institute on Aging, National Institutes of Health, Porter  
11  
12 Neuroscience Research Center, Bethesda, Maryland  
13  
14  
15

16  
17 **Corresponding Author:**

18  
19 Bryan J. Traynor MD PhD,  
20  
21 35 Convent Drive, Room 1A-213, Bethesda, MD 20892-3707.  
22  
23 *Phone:* 301-451-7606.  
24  
25  
26 traynorb@mail.nih.gov  
27  
28  
29

30  
31 **Author Contact Information:**

32  
33 Joshua D. Green josh.green@nih.gov  
34  
35 Richard J. Barohn rbarohn@kumc.edu  
36  
37 Emanuela Bartoccion ebartoc@gmail.com  
38  
39 Michael Benetar MBenatar@med.miami.edu  
40  
41  
42 Derrick Blackmore dblackmo@ualberta.ca  
43  
44 Vinay Chaudhry vchaudh@jhmi.edu  
45  
46 Manisha Chopra chopram@neurology.unc.edu  
47  
48  
49 Andrea Corse acorse@jhmi.edu  
50  
51 Mazen M. Dimachkie mdimachkie@kumc.edu  
52  
53  
54 Amelia Evoli amelia.evoli@unicatt.it  
55  
56  
57  
58  
59  
60

1  
2  
3 Julaine Florence florencej@neuro.wustl.edu  
4

5 Miriam Freimer miriam.freimer@osumc.edu  
6

7 James F. Howard Jr howardj@neurology.unc.edu  
8

9  
10 Theresa Jiwa theresajiwa@shaw.ca  
11

12 Henry J. Kaminski henryjkaminski@gmail.com  
13

14 John Kissel John.Kissel@osumc.edu  
15

16 Wilma J. Koopman wkoopman@uwo.ca  
17

18 Bernadette Lipscomb btlipscomb@gmail.com  
19

20 Michelangelo Maestri michelangelo.mvg@tin.it  
21

22 Mariapaola Marino mariapaola.marino@unicatt.it  
23

24 Janice M. Massey masse005@mc.duke.edu  
25

26 April McVey aprillynnmcvey@gmail.com  
27

28 Michelle M. Mezei mezei@mail.ubc.ca  
29

30 Srikanth Muppidi muppidis@stanford.edu  
31

32 Michael W. Nicolle mnicolle@uwo.ca  
33

34 Joel Oger joel.oger@ubc.ca  
35

36 Robert M. Pascuzzi rpascuzz@iupui.edu  
37

38 Mamatha Pasnoor mpasnoor@kumc.edu  
39

40 Alan Pestronk pestronka@neuro.wustl.edu  
41

42 Carlo Provenzano carlo.provenzano@unicatt.it  
43

44 Roberta Ricciardi r.ricciardi@ao-pisa.toscana.it  
45

46 David P. Richman dprichman@ucdavis.edu  
47

48 Julie Rowin jrowin@apacgroupe.com  
49  
50  
51  
52  
53  
54  
55  
56  
57  
58  
59  
60

1  
2  
3 Donald B. Sanders sande007@mc.duke.edu  
4

5 Zaeem Siddiqi zsiddiqi@ualberta.ca  
6

7 Aimee Soloway Aimee.Soloway@albertahealthservices.ca  
8  
9

10 Gil I. Wolfe gilwolfe@buffalo.edu  
11

12 Charlie Wulf wulfc@neuro.wustl.edu  
13

14 Daniel Drachman dandrac@aol.com  
15

16 Bryan J. Traynor [traynorb@mail.nih.gov](mailto:traynorb@mail.nih.gov)  
17  
18  
19  
20

21 Submission Type: **Original Research**  
22

23 Title Character count: **60**  
24

25 Number of Tables: **2**  
26  
27

28 Number of Figures: **3**  
29

30 Number of References: **22**  
31

32 Word count of Abstract: **201**  
33  
34

35 Word count of Paper: **2020**  
36  
37  
38  
39  
40  
41  
42  
43

44 **Statistical analysis:** conducted by Joshua Green, BS, and Dr. Bryan Traynor, MD,  
45  
46 PhD, National Institutes of Health.  
47  
48  
49  
50  
51  
52  
53  
54  
55  
56  
57  
58  
59  
60

## ABSTRACT

**Objectives** To approximate the rate of familial myasthenia gravis and the coexistence of other autoimmune disorders in the patients and their families.

**Design** Retrospective cohort study

**Setting** Clinics across North America

**Participants** The study included 1,032 patients diagnosed with acetylcholine receptor antibody (AChR)-positive myasthenia gravis

**Methods** Phenotype information of 1,032 patients diagnosed with acetylcholine receptor antibody (AChR)-positive myasthenia gravis was obtained from clinics at fourteen centers across North America between January 2010 and January 2011. A critical review of the epidemiological literature on the familial rate of myasthenia gravis was also performed.

**Results** Among 1,032 patients, 58 (5.6%) reported a family history of myasthenia gravis. In comparing the familial and sporadic cohorts, the only feature that was different was the lower age of onset in familial cases. A history of autoimmune diseases was present in 26.6% of patients and in 28.4% of their family members.

**Discussion** The familial rate of myasthenia gravis was higher than would be expected for a sporadic disease. Furthermore, a high proportion of patients had a personal or family history of autoimmune disease. Taken together, these findings suggest a genetic contribution to the pathogenesis of myasthenia gravis.

## ARTICLE SUMMARY

### Strengths and limitations of this study

- A strength of this study is that it analyzes a large cohort of myasthenia gravis patients with complete data on each patient, allowing multiple clinical correlations to be made.
- A strength of this study is that standardized criteria were used to diagnose patients with myasthenia gravis, including establishing the specific subtype of the disease for each patient.
- A strength of this study is that the cohort of myasthenia gravis patients was sufficiently large to allow the generation of evidence confirming a genetic contribution to the disease.
- A limitation of this study is the reliance on self-reported family history status for both myasthenia gravis and other autoimmune diseases by the patients.
- A limitation of this study is its retrospective design, which precludes ascertaining additional information from individual patients.

## INTRODUCTION

Myasthenia gravis is a rare autoimmune disease that is characterized by antibody-mediated interference with neuromuscular transmission at the neuromuscular junction. Originally, the role for an autoimmune attack against the acetylcholine receptor (AChR) on the postsynaptic side of the neuromuscular junction was recognized.<sup>1</sup> However, over the past decade, additional autoimmune targets have been identified: muscle-specific tyrosine kinase (MuSK), agrin, and lipoprotein receptor-related protein 4 (LRP4).<sup>2-4</sup> All of these proteins play essential roles in maintaining the structure and function of the neuromuscular junction.

Myasthenia gravis manifests clinically with muscle weakness and fatigability. Symptoms of ocular muscle weakness are observed early in 85% of myasthenic patients.<sup>5</sup> These symptoms include diplopia and/or ptosis. Weakness of the bulbar musculature is observed in 60% of myasthenic patients, with symptoms including dysarthria and/or dysphagia.<sup>5</sup>

A recent literature review of thirty-one epidemiological studies suggests that the annual incidence of myasthenia gravis may range between 3 and 30 cases per million people.<sup>6</sup> A common theme among myasthenia gravis epidemiological studies is that there is a significant degree of variability between cohorts. For example, a study of a Hong Kong Chinese cohort reported an incidence of 4 per million people per year, whereas a study of an English cohort reported an incidence of 30 per million people per year.<sup>7, 8</sup> This substantial degree of variability may be the result of inconsistent diagnostic criteria, varying case ascertainment, lack of physician awareness concerning myasthenia gravis, or it may reflect different occurrence across populations.

1  
2  
3 Historically, adult-onset myasthenia gravis has been regarded as a sporadic  
4 disease with only a minimal genetic component.<sup>9</sup> However, genome-wide association  
5 studies, fine-mapping studies, and epidemiological studies of myasthenia gravis  
6 suggest a genetic contribution to the disease.<sup>10, 11</sup> In fact, studies have described  
7 myasthenic patients with a family history of myasthenia gravis and/or a family history of  
8 autoimmune diseases. In this study, we performed a literature search of the familial rate  
9 reported by myasthenia gravis epidemiological studies and, using our cohort of 1,032  
10 North American myasthenia gravis patients, approximated the prevalence of familial  
11 myasthenia gravis, compared the characteristics of familial disease with sporadic  
12 disease, and assessed the co-morbidity of other autoimmune diseases among patients  
13 and among their families.  
14  
15  
16  
17  
18  
19  
20  
21  
22  
23  
24  
25  
26  
27  
28  
29  
30

## 31 **METHODS**

### 32 **Patient ascertainment**

33 Phenotype information of 1,032 patients diagnosed with myasthenia gravis was  
34 obtained from myasthenia gravis clinics at fourteen centers across North America  
35 between January 2010 and January 2011.<sup>10</sup> Patients were diagnosed by neurologists  
36 specializing in myasthenia gravis. Each myasthenia gravis diagnosis was based on  
37 standard clinical criteria that included, but was not limited to, weakness, fatigability, and  
38 electrophysiological, pharmacological (edrophonium test) and/or serological  
39 abnormalities. Inclusion criteria for this study were as follows: confirmed diagnosis of  
40 myasthenia gravis, non-Hispanic white ethnicity, and presence of anti-AChR antibodies.  
41 Patients with anti-MuSK antibodies were excluded from the study. The LRP4 antibody  
42  
43  
44  
45  
46  
47  
48  
49  
50  
51  
52  
53  
54  
55  
56  
57  
58  
59  
60

1  
2  
3 was discovered after the collection of the cohort was complete. Thus, the LRP4  
4  
5 antibody status of the patients was not known. Family histories of myasthenia gravis  
6  
7 and other autoimmune diseases were systematically obtained for each subject using a  
8  
9 simple structured questionnaire. A positive family history was defined as having a first-  
10  
11 degree (50% of DNA in common), second-degree (25% of DNA in common), or third-  
12  
13 degree (12.5% of DNA in common) relative with the disease. DNA samples were  
14  
15 collected from each subject and used for genetic analyses as previously reported.<sup>10</sup>  
16  
17  
18 Patients with genetic forms of myasthenia gravis were not explicitly excluded, though  
19  
20 none of the cohort was known to have such a mutation.  
21  
22  
23  
24  
25

### 26 **Literature review methodology**

27  
28 To find studies about the epidemiology of familial myasthenia gravis, the PubMed and  
29  
30 Medline databases were searched using permutations of search terms: 'epidemiology of  
31  
32 familial myasthenia gravis', 'epidemiology of myasthenia gravis', and 'heritability of  
33  
34 myasthenia gravis'. After reviewing thirty-one epidemiology studies between the years  
35  
36 of 1950 through 2018, only ten studies explicitly referenced the family history of  
37  
38 myasthenic patients. Five of those papers provided metrics about family members with  
39  
40 myasthenia gravis.<sup>12-16</sup>  
41  
42  
43  
44  
45  
46

### 47 **Patient and public involvement statement**

48  
49 No patients or members of the public were actively involved with co-producing the  
50  
51 research presented in this article.  
52  
53  
54  
55  
56  
57  
58  
59  
60



## Statement of ethics approval

Written informed consent was obtained from all patients who participated in this study.

Institution review board (IRB) approval was obtained at all participating institutions.

Lead institutes for IRB = National Institutes of Health, protocol 03-AG-N329,

<https://clinicaltrials.gov/ct2/show/NCT02014246>

## Data availability

The data, consisting of patient family history of myasthenia gravis and other autoimmune diseases in addition to patient personal history of other autoimmune diseases, are not publicly available because of patient privacy concerns but de-identified participant data are available upon request by contacting the corresponding author. In the interests of scientific rigor, the code used for analysis of the dataset is available on GitHub: <https://github.com/neurogenetics/Familial-Myasthenia-Gravis>.

## RESULTS

### North American cohort of myasthenia gravis patients

Clinical data were collected from a total of 1,032 patients across fourteen centers in North America and were analyzed in this study. All of the patients had positive anti-AChR antibodies. The mean age of symptom onset in this clinic-based cohort was 53.5 years of age (standard deviation (SD) = 19.4). The female-to-male ratio was 1:1.27. Early-onset disease (< 40 years of age) was observed among 248 (24.0%) of the cohort. Consistent with other reports, nearly one third of the patients in our North American study cohort (305, 29.6%) had undergone thymectomy.

Fifty-eight (5.6%) patients had a family history of myasthenia gravis. Sibling-sibling (31.0%) and parent-child (32.8%) were the most common type of familial relationship, followed by uncle/aunt-nephew/niece (13.8%), cousin-cousin (12.1%) and grandparent-grandchild (5.2%) relationships. Age at symptom onset was slightly younger (50.5 years of age, SD = 19.4) among patients reporting a family history compared to patients without a positive family history (53.7 years, SD = 19.4), though this difference was not statistically significant (p-value = 0.23, Welch's independent two group t-test, figure 1). Approximately one fourth of the familial patients (n = 15) experienced disease prior to the age of 40 (table 1).

**Table 1.** Comparison of familial and sporadic cases among a cohort of patients diagnosed with myasthenia gravis (n = 1,032)

|                                                                              | <b>Familial</b> | <b>Sporadic</b> | <b>P-value</b> |
|------------------------------------------------------------------------------|-----------------|-----------------|----------------|
| <b>Number of myasthenia gravis cases (percent)</b>                           | 58 (5.6)        | 974 (94.4)      | -              |
| <b>Mean age of disease onset (years) (standard deviation)</b>                | 50.5 (19.4)     | 53.7 (19.4)     | 0.227          |
| <b>Number of patients with early-onset disease (&lt; 40 years) (percent)</b> | 15 (25.9)       | 233 (23.9)      | 0.86           |
| <b>Number of females</b>                                                     | 25 (43.1)       | 429 (44.0)      | 0.997          |

---

(percent)

---

A personal history of an autoimmune disease other than myasthenia gravis was reported in 275 (26.6%) of study participants. A total of 293 (28.4%) subjects had a family history of an autoimmune disease. The prevalence of autoimmunity in the general population is ~3-9%, indicating that the rates observed among our myasthenia gravis subjects are significantly increased.<sup>17</sup> A breakdown of the specific autoimmune diseases for both personal history and family history of disease is shown in figure 2A and figure 2B.

The most common autoimmune diseases present concomitantly in myasthenia gravis patients were thyroid disease (n = 118, 11.4%), hematological disease (n = 33, 3.2% consisting of autoimmune hemolytic anemia and autoimmune thrombocytopenic purpura), and rheumatoid arthritis (n=28, 2.7%). This was similar to the rates previously reported by Mao et al (figure 2C).<sup>18</sup>

The three most common autoimmune diseases present in the families of myasthenia gravis patients were thyroid disease (n=98, 9.5%), rheumatoid arthritis (n=68, 6.6%), and type 1 diabetes (n=36, 3.5%).

## Literature review

Literature review concerning the epidemiology of familial myasthenia gravis identified five studies that discussed the patient's family history of myasthenia gravis with sample sizes that ranged from 264 to 6,638 (table 2).<sup>12-16</sup> The frequency of familial myasthenia gravis ranged from 0.2% to 7.2% across studies, the upper limit having been reported

based on a Finnish cohort.<sup>15</sup> Among these, three studies reported that familial myasthenia gravis cases had an earlier symptom onset age than the sporadic cases.<sup>12, 14, 15</sup> Only three studies reported on the patient history of other autoimmune diseases and/or on the family history of other autoimmune diseases.<sup>12, 14, 15</sup> Among these, thyroid disease, rheumatoid arthritis, systemic lupus erythematosus, and Sjogren's syndrome were the most common other autoimmune diseases reported in patients' personal and/or family histories.<sup>12, 14, 15</sup>

**Table 2.** Studies reporting the rate of familial disease in myasthenia gravis.

| Source | Origin        | Sample size | Familial rate | Study type |
|--------|---------------|-------------|---------------|------------|
| 12     | Taiwan        | 6,638       | 0.2%          | Population |
| 13     | Japan         | 3,141       | 0.7%          | Population |
| 14     | Spain         | 462         | 3.5%          | Clinic     |
| 15     | Finland       | 264         | 7.2%          | Population |
| 16     | United States | 702         | 3.8%          | Clinic     |

## DISCUSSION

We found the prevalence of familial myasthenia gravis in our North American cohort to be 5.6%. This is comparable to the prevalence reported in other studies, where the frequency ranged from 0.2% to 7.2% of myasthenia gravis patients having a family history of myasthenia gravis depending on the cohort studied. Although the vast

1  
2  
3 majority of myasthenia gravis cases are still non-familial, a prevalence of 5.6%  
4  
5 represents a several hundred-fold increase for a disease with an overall prevalence of 1  
6  
7 in 5-10,000. The two studies of myasthenia gravis based on Asian cohorts reported  
8  
9 substantially lower rates of familial disease compared to our North American cohort and  
10  
11 other European cohorts. For example, two studies of Taiwanese (n = 6,638) and  
12  
13 Japanese (n = 3,141) cohorts reported rates of familial myasthenia gravis at 0.2% and  
14  
15 0.7%, respectively. Three studies of Spanish, American, and Finnish cohorts reported  
16  
17 rates of 3.5%, 3.8%, and 7.2% (table 2). The familial rates reported in our cohort of over  
18  
19 1,000 patients were, as expected, closer in value to the rates reported among European  
20  
21 and American cohorts. Overall, these data suggest that there is population variation in  
22  
23 the inheritance of myasthenia gravis that warrants further study to identify the genetic  
24  
25 contribution to disease risk.  
26  
27  
28  
29

30  
31 For a number of genetic diseases, a family history is often associated with an  
32  
33 earlier age of onset.<sup>19, 20</sup> Three of the studies in the literature review reported that this  
34  
35 was also true of myasthenia gravis.<sup>12, 14, 15</sup> Interestingly, we also observed an earlier  
36  
37 onset age in the familial cases (50.5 years of age) compared to the non-familial (53.7  
38  
39 years of age) cases in our cohort (table 1). However, this difference was not significant,  
40  
41 a finding that is consistent with previous reports.  
42  
43

44  
45 Another notable feature of our cohort is that males had a slightly higher  
46  
47 prevalence of familial myasthenia gravis compared to the females (1:1.32), suggesting  
48  
49 that there might be sex-specific differences in the occurrence of familial versus sporadic  
50  
51 disease. This observation may reflect the different age distribution of myasthenia gravis  
52  
53 cases in males versus females observed across all myasthenia gravis cases (mean  
54  
55  
56  
57  
58  
59  
60

1  
2  
3 onset age for females = 45.6; mean onset age for males = 59.8). Indeed, our previous  
4 genome-wide association study of myasthenia gravis indicated that the genetic  
5 architecture was different among younger and older age groups.<sup>10</sup>  
6  
7

8  
9  
10 Myasthenia gravis is an immunological disorder and, generally speaking,  
11 autoimmune diseases are known to have heritable components.<sup>21</sup> Likewise,  
12 approximately one-third of our cohort had a personal history and/or a family history of  
13 another autoimmune disease, which is much higher than the prevalence of 3-9%, which  
14 has been historically reported in the general population.<sup>17</sup> We observed that familial  
15 myasthenia gravis were more likely to have a personal history of autoimmune disease  
16 than the sporadic cohort. Similar to previous reports, we found thyroid disease,  
17 rheumatoid arthritis, systemic lupus erythematosus, and type 1 diabetes to be the most  
18 commonly identified comorbidities (figure 2C).<sup>18, 21</sup> Interestingly, the frequency of thyroid  
19 disease in this cohort (11.4%) is similar to the frequency range of thyroid disease  
20 reported in a study by Kiessling et al.<sup>22</sup> The increased prevalence of familial myasthenia  
21 gravis and increased prevalence of other autoimmune disorders both suggest that these  
22 autoimmune diseases may share a common predisposition that may be genetic in  
23 origin.  
24  
25  
26  
27  
28  
29  
30  
31  
32  
33  
34  
35  
36  
37  
38  
39  
40  
41

42 Our analyses provide evidence of a genetic contribution to myasthenia gravis  
43 based on the higher than expected rate of familial disease observed among our North  
44 American patient cohort, as well as the co-occurrence of autoimmune diseases known  
45 to have a genetic basis among this population. More work needs to be done to further  
46 elucidate the genetic etiology of this archetypal autoimmune disease.  
47  
48  
49  
50  
51  
52  
53  
54  
55  
56  
57  
58  
59  
60

## ACKNOWLEDGEMENTS

This work was supported in part by the Intramural Research Programs of the National Institutes of Health National Institute on Aging (Z01-AG000949-02). The work was also supported by the Myasthenia Gravis Foundation (Drs Drachman and Traynor), a generous bequest by Geraldine Weinrib, and a gift from Philip Swift. Support was provided by Mr. and Mrs. Don Brandon and the Department of Neurology, University of Kansas Medical Center. The funders had no role in the design and conduct of the study; collection, management, analysis, and interpretation of the data; preparation, review, or approval of the manuscript; and decision to submit the manuscript for publication. We thank the patients and research participants who contributed samples for this study.

## Competing interests

Mr. Green none declared.

Dr. Barohn served as a consultant for NuFactor and Momenta Pharmaceutical and receives research support from PTC Therapeutics, Ra Pharma, Orphazyme, Sanofi Genzyme, FDA OOPD, NIH, and PCORI.

Dr. Bartoccion none declared.

Dr. Benetar reports grant support from Muscular Dystrophy Association, ALS Association, ALS Recovery Fund, Kimmelman Estate, Target ALS, Eli Lilly & Company, and the National Institutes of Health (NIH) during the conduct of the study. He also reports grant support from FDA, CDC, and DOD; research support from Alexion

1  
2  
3 Pharmaceuticals, UCB, Cytokinetics, Neuraltus, Biogen and Orphazyme A/S; and  
4  
5 personal fees from NMD Pharma, Ra Pharmaceuticals, Mitsubishi-Tanabe, Avexis,  
6  
7 UCB and Denali outside the submitted work.

8  
9  
10 Mr. Blackmore none declared

11  
12 Dr. Chaudhry served as a consultant for review and expert testimony for the  
13  
14 Department of Health and Human Services and the Department of Justice under the  
15  
16 Vaccine Injury and Compensation Program. Dr. Chaudhry has received royalty for total  
17  
18 neuropathy score (TNS) patented (through Johns Hopkins University) for license of TNS  
19  
20 use from AstraZeneca, Genentech, Seattle Genetics, Calithera Biosciences, Inc,  
21  
22 Merrimack Pharmaceuticals, Inc., Levicept, and Acetylon Pharmaceuticals, Inc.

23  
24  
25 Dr. Chopra none declared.

26  
27  
28 Dr. Corse none declared.

29  
30  
31 Dr. Dimachkie recently served as a consultant or on the speaker's bureau for Alnylam,  
32  
33 Audentes, CSL-Behring, Sanofi Genzyme, Momenta, NuFactor, RMS Medical, Shire  
34  
35 Takeda and Terumo. Dr. Dimachkie received grants from Alexion, Alnylam  
36  
37 Pharmaceuticals, Amicus, Biomarin, Bristol-Myers Squibb, Catalyst, CSL-Behring,  
38  
39 FDA/OPD, GlaxoSmithKline, Genentech, Grifols, MDA, NIH, Novartis, Genzyme,  
40  
41 Octapharma, Orphazyme, UCB Biopharma, Viomed and TMA.

42  
43  
44 Dr. Evoli was a member of the advisory board for Alexion, a scientific award jury  
45  
46 member for Grifols and safety data monitor for UCB.

47  
48  
49 Dr. Florence none declared.

50  
51  
52 Dr. Freimer has received honoraria for serving on advisory boards for ARGNX pharma,  
53  
54 Alexion. Dr. Freimer also has research support from Catalyyst, Ra pharma, Amicus,



1  
2  
3 Orphazyme, Alexion, Momenta and Alnylum.  
4

5 Dr. Howard reports research support and grants from Alexion Pharmaceuticals, argenx  
6  
7 BVBA, Centers for Disease Control and Prevention, Muscular Dystrophy Association,  
8  
9 NIH (including the National Institute of Neurologic Disorders and Stroke and the  
10  
11 National Institute of Arthritis and Musculoskeletal and Skin Disease), PCORI (Patient-  
12  
13 Centered Outcomes Research Institute), and Ra Pharmaceuticals; and nonfinancial  
14  
15 support from Alexion Pharmaceuticals, argenx BVBA, Ra Pharmaceuticals, and  
16  
17 Toleranzia.  
18  
19

20  
21 Dr. Jiwa none declared.  
22

23  
24 Dr. Kaminski is funded by the Muscular Dystrophy Association (508240) and by NIH  
25  
26 grant U54NS115054; is a consultant for Alnylam Pharmaceuticals, Ra Pharmaceuticals,  
27  
28 and UCB Pharmaceuticals; and is CEO of ARC Biotechnology, LLC, which receives  
29  
30 support from the NIH (R41NS110331). He serves on the Editorial Board of Experimental  
31  
32 Neurology.  
33

34  
35 Dr. Kissel none declared.  
36

37  
38 Ms. Koopman none declared.  
39

40  
41 Ms. Lipscomb none declared.  
42

43  
44 Dr. Maestri none declared.  
45

46  
47 Dr. Marino none declared.  
48

49  
50 Dr. Massey none declared  
51

52  
53 Dr. McVey none declared.  
54

55  
56 Dr. Mezei has received honoraria as a speaker and/or moderator from Alnylam, Akcea,  
57  
58 Pfizer and CSL Behring. She has served on Advisory Boards for Pfizer, Alnylam and  
59  
60

1  
2  
3 Akcea. She serves as an investigator for clinical trials with Alnylam and Biogen.

4  
5 Dr. Muppidi has served on advisory board meetings for Alexion and argenx.

6  
7 Dr. Nicolle none declared.

8  
9 Dr. Oger none declared.

10  
11 Dr. Pascuzzi none declared.

12  
13 Dr. Pasnoor served on advisory board for CSL Behring, Alexion pharmaceuticals,  
14  
15 Argenx Pharmaceuticals and has been consultant for Momenta Pharmaceuticals.

16  
17 Dr. Pestronk none declared.

18  
19 Dr. Provenzano none declared.

20  
21 Dr. Ricciardi none declared.

22  
23 Dr. Richman receives research funding from a Sponsored Research Agreement from  
24  
25 Cabaletta Bioscience.

26  
27 Dr. Rowin none declared.

28  
29 Dr. Sanders none declared.

30  
31 Dr. Siddiqi none declared.

32  
33 Ms. Soloway none declared

34  
35 Dr. Wolfe none declared.

36  
37 Dr. Wulf none declared.

38  
39 Dr. Drachman none declared.

40  
41 Dr. Traynor holds an American and European Union patent on the clinical testing and  
42  
43 therapeutic intervention for the hexanucleotide repeat expansion of C9orf72. Has  
44  
45 received research grants from The Myasthenia Gravis Foundation, the Robert Packard  
46  
47 Center for ALS Research, the ALS Association (ALSA), the Italian Football Federation  
48  
49  
50  
51  
52  
53  
54  
55  
56  
57  
58  
59  
60

1  
2  
3 (FIGC), the Center for Disease Control and Prevention (CDC), the Muscular Dystrophy  
4 Association (MDA), Merck Inc., and Microsoft Research. Dr. Traynor receives funding  
5 through the Intramural Research Program at the National Institutes of Health.  
6  
7  
8  
9

## 10 **Funding**

11  
12 Study funding by the National Institutes of Health Intramural Research Program. The  
13 work was also supported by the Myasthenia Gravis Foundation (Drs Drachman and  
14 Traynor), a generous bequest by Geraldine Weinrib, and a gift from Philip Swift. Support  
15 was provided by Mr. and Mrs. Don Brandon and the Department of Neurology,  
16 University of Kansas Medical Center.  
17  
18  
19  
20  
21  
22  
23  
24  
25

## 26 **References**

- 27  
28  
29 1. Fambrough DM, Drachman DB, Satyamurti S. Neuromuscular  
30 junction in myasthenia gravis: decreased acetylcholine receptors. *Science* 1973;  
31 182:293-295.  
32  
33  
34  
35 2. Hoch W, McConville J, Helms S, Newsom-Davis J, Melms A, Vincent A. Auto-  
36 antibodies to the receptor tyrosine kinase MuSK in patients with myasthenia gravis  
37 without acetylcholine receptor antibodies. *Nat Med* 2001;7:365-368.  
38  
39  
40  
41 3. Gasperi C, Melms A, Schoser B, et al. Anti-agrin autoantibodies in myasthenia  
42 gravis. *Neurology* 2014;82:1976-1983.  
43  
44  
45  
46 4. Higuchi O, Hamuro J, Motomura M, Yamanashi Y. Autoantibodies to low-density  
47 lipoprotein receptor-related protein 4 in myasthenia gravis. *Ann Neurol* 2011;69:418-  
48 422.  
49  
50  
51  
52  
53  
54  
55  
56  
57  
58  
59  
60

- 1  
2  
3 5. Jayam Trouth A, Dabi A, Solieman N, Kurukumbi M, Kalyanam J. Myasthenia  
4  
5 gravis: a review. *Autoimmune Dis* 2012;2012:874680.
- 6  
7 6. McGrogan A, Sneddon S, de Vries CS. The incidence of myasthenia gravis: a  
8  
9 systematic literature review. *Neuroepidemiology* 2010;34:171-183.
- 10  
11 7. Yu YL, Hawkins BR, Ip MS, Wong V, Woo E. Myasthenia gravis in Hong Kong  
12  
13 Chinese. 1. Epidemiology and adult disease. *Acta Neurol Scand* 1992;86:113-119.
- 14  
15 8. MacDonald BK, Cockerell OC, Sander JW, Shorvon SD. The incidence and  
16  
17 lifetime prevalence of neurological disorders in a prospective community-based study in  
18  
19 the UK. *Brain* 2000;123 ( Pt 4):665-676.
- 20  
21 9. Spillane J, Higham E, Kullmann DM. Myasthenia gravis. *BMJ* 2012;345:e8497.
- 22  
23 10. Renton AE, Pliner HA, Provenzano C, et al. A genome-wide association study of  
24  
25 myasthenia gravis. *JAMA Neurol* 2015;72:396-404.
- 26  
27 11. Giraud M, Vandiedonck C, Garchon HJ. Genetic factors in autoimmune  
28  
29 myasthenia gravis. *Ann N Y Acad Sci* 2008;1132:180-192.
- 30  
31 12. Liu FC, Kuo CF, See LC, Tsai HI, Yu HP. Familial aggregation of myasthenia  
32  
33 gravis in affected families: a population-based study. *Clin Epidemiol* 2017;9:527-535.
- 34  
35 13. Murai H, Yamashita N, Watanabe M, et al. Characteristics of myasthenia gravis  
36  
37 according to onset-age: Japanese nationwide survey. *J Neurol Sci* 2011;305:97-102.
- 38  
39 14. Salvado M, Canela M, Ponseti JM, et al. Study of the prevalence of familial  
40  
41 autoimmune myasthenia gravis in a Spanish cohort. *J Neurol Sci* 2016;360:110-114.
- 42  
43 15. Pirskanen R. Genetic aspects in myasthenia gravis. A family study of 264 Finnish  
44  
45 patients. *Acta Neurol Scand* 1977;56:365-388.
- 46  
47  
48  
49  
50  
51  
52  
53  
54  
55  
56  
57  
58  
59  
60

- 1  
2  
3 16. Namba T, Brunner NG, Brown SB, Muguruma M, Grob D. Familial myasthenia  
4  
5 gravis. Report of 27 patients in 12 families and review of 164 patients in 73 families.  
6  
7 Arch Neurol 1971;25:49-60.  
8  
9
- 10 17. Cooper GS, Bynum ML, Somers EC. Recent insights in the epidemiology of  
11  
12 autoimmune diseases: improved prevalence estimates and understanding of clustering  
13  
14 of diseases. J Autoimmun 2009;33:197-207.  
15  
16
- 17 18. Mao ZF, Yang LX, Mo XA, et al. Frequency of autoimmune diseases in  
18  
19 myasthenia gravis: a systematic review. Int J Neurosci 2011;121:121-129.  
20  
21
- 22 19. Ryman DC, Acosta-Baena N, Aisen PS, et al. Symptom onset in autosomal  
23  
24 dominant Alzheimer disease: a systematic review and meta-analysis. Neurology  
25  
26 2014;83:253-260.  
27
- 28 20. Kharazmi E, Fallah M, Sundquist K, Hemminki K. Familial risk of early and late  
29  
30 onset cancer: nationwide prospective cohort study. BMJ 2012;345:e8076.  
31  
32
- 33 21. Ceccarelli F, Agmon-Levin N, Perricone C. Genetic Factors of Autoimmune  
34  
35 Diseases. J Immunol Res 2016;2016:1-2.  
36  
37
- 38 22. Kiessling WR, Finke R, Kotulla P, Schleusener H. Circulating TSH-binding  
39  
40 inhibiting immunoglobulins in myasthenia gravis. Acta Endocrinol (Copenh)  
41  
42 1982;101:41-46.  
43  
44  
45  
46  
47  
48  
49  
50  
51  
52  
53  
54  
55  
56  
57  
58  
59  
60

## Figures

### Figure 1.

Symptom-onset age distribution of sporadic and familial cases. The density represents the relative probability of myasthenia gravis at each age point.

### Figure 2.

Autoimmune diseases in a cohort of 1,032 patients with myasthenia gravis. (A)

Occurrence of autoimmune diseases among patients with myasthenia (n = 275). (B)

Occurrence of autoimmune diseases among familial relatives of patients with

myasthenia gravis (n = 293). (C) Comparisons of autoimmune diseases among patients with myasthenia gravis and among relatives. Size of circles represent the percentage previously reported by Mao et al.<sup>18</sup>

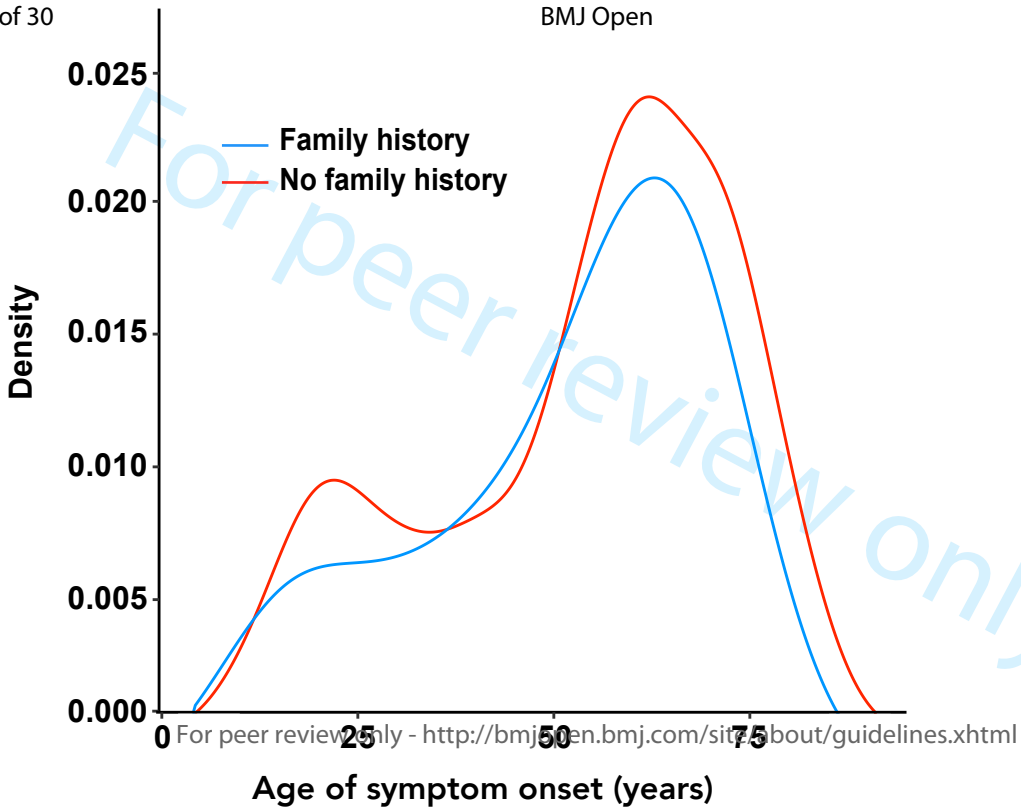

1  
2  
3  
4  
5  
6  
7  
8  
9  
10  
11  
12  
13  
14  
15  
16  
17  
18  
19  
20  
21  
22  
23

# A. Personal history of autoimmune diseases

# B. Family history of autoimmune diseases

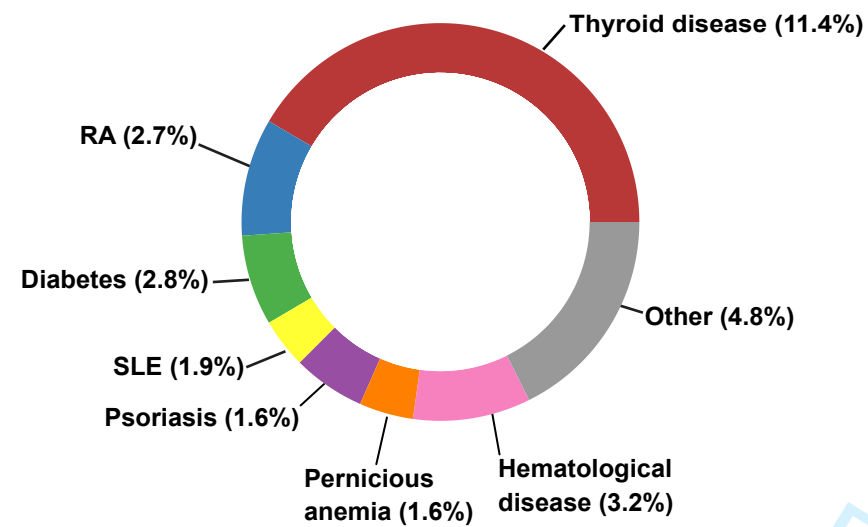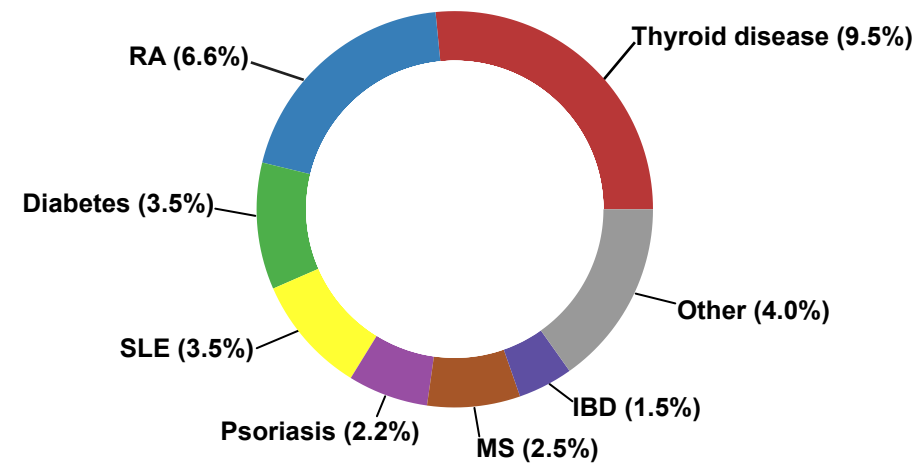

# C. Relationships between personal and family histories of autoimmune diseases

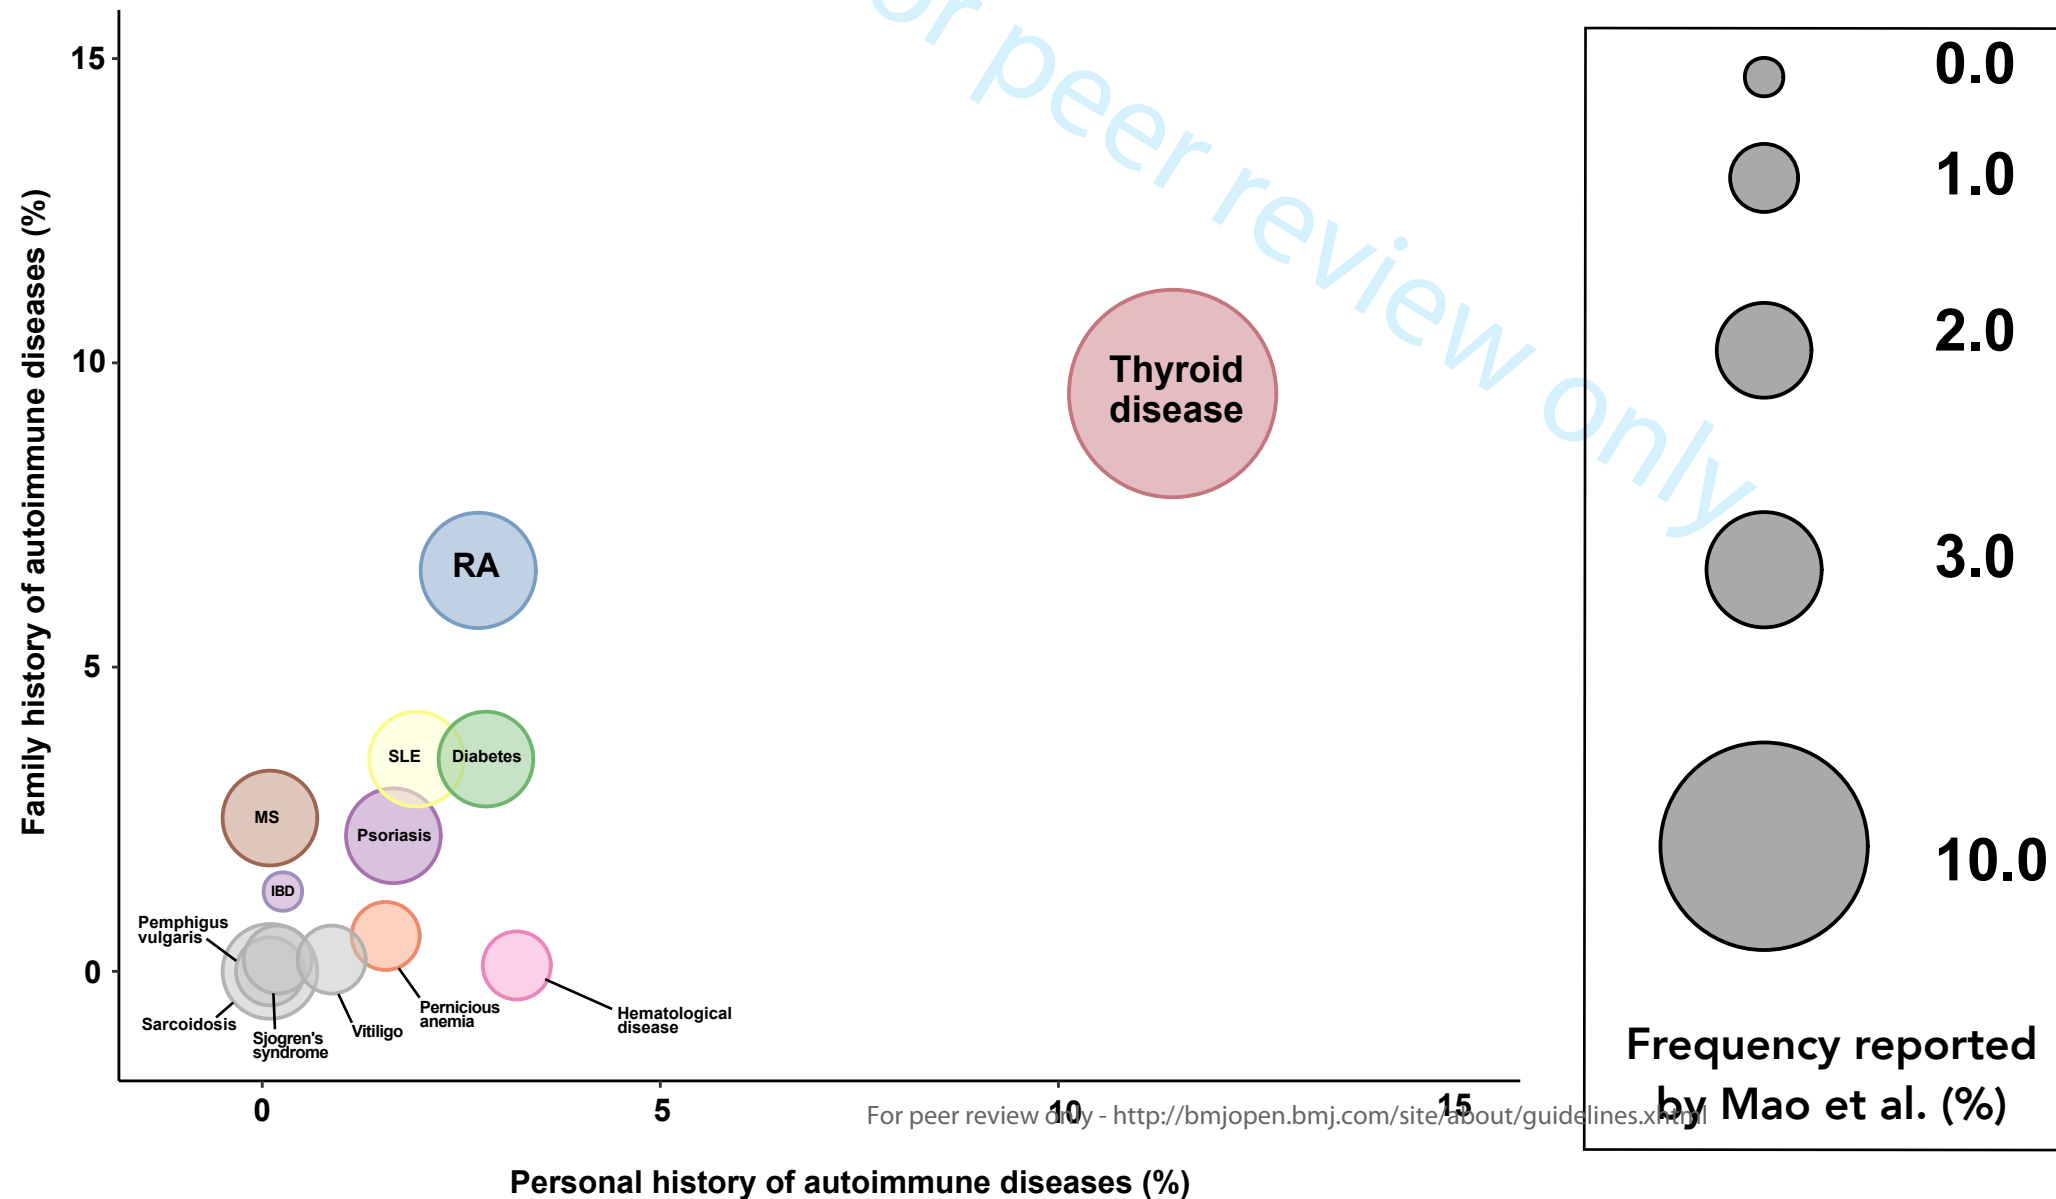



**STROBE 2007 (v4) Statement—Checklist of items that should be included in reports of *cohort studies***

| Section/Topic                | Item # | Recommendation                                                                                                                                                                       | Reported on page # |
|------------------------------|--------|--------------------------------------------------------------------------------------------------------------------------------------------------------------------------------------|--------------------|
| <b>Title and abstract</b>    | 1      | (a) Indicate the study's design with a commonly used term in the title or the abstract                                                                                               | 1                  |
|                              |        | (b) Provide in the abstract an informative and balanced summary of what was done and what was found                                                                                  | 7-8                |
| <b>Introduction</b>          |        |                                                                                                                                                                                      | <b>10-11</b>       |
| Background/rationale         | 2      | Explain the scientific background and rationale for the investigation being reported                                                                                                 | 10-11              |
| Objectives                   | 3      | State specific objectives, including any prespecified hypotheses                                                                                                                     | 11                 |
| <b>Methods</b>               |        |                                                                                                                                                                                      | <b>11-13</b>       |
| Study design                 | 4      | Present key elements of study design early in the paper                                                                                                                              | 11                 |
| Setting                      | 5      | Describe the setting, locations, and relevant dates, including periods of recruitment, exposure, follow-up, and data collection                                                      | 11-13              |
| Participants                 | 6      | (a) Give the eligibility criteria, and the sources and methods of selection of participants. Describe methods of follow-up                                                           | 11                 |
|                              |        | (b) For matched studies, give matching criteria and number of exposed and unexposed                                                                                                  | NA                 |
| Variables                    | 7      | Clearly define all outcomes, exposures, predictors, potential confounders, and effect modifiers. Give diagnostic criteria, if applicable                                             | 11-13              |
| Data sources/<br>measurement | 8*     | For each variable of interest, give sources of data and details of methods of assessment (measurement). Describe comparability of assessment methods if there is more than one group | 11-13              |
| Bias                         | 9      | Describe any efforts to address potential sources of bias                                                                                                                            | 11-13              |
| Study size                   | 10     | Explain how the study size was arrived at                                                                                                                                            | 11-13              |
| Quantitative variables       | 11     | Explain how quantitative variables were handled in the analyses. If applicable, describe which groupings were chosen and why                                                         | 11-13              |
| Statistical methods          | 12     | (a) Describe all statistical methods, including those used to control for confounding                                                                                                | 14-15              |
|                              |        | (b) Describe any methods used to examine subgroups and interactions                                                                                                                  | 14-15              |
|                              |        | (c) Explain how missing data were addressed                                                                                                                                          | 14-15              |
|                              |        | (d) If applicable, explain how loss to follow-up was addressed                                                                                                                       | 14-15              |
|                              |        | (e) Describe any sensitivity analyses                                                                                                                                                | NA                 |
| <b>Results</b>               |        |                                                                                                                                                                                      | <b>13-15</b>       |

|                          |     |                                                                                                                                                                                                              |         |
|--------------------------|-----|--------------------------------------------------------------------------------------------------------------------------------------------------------------------------------------------------------------|---------|
| Participants             | 13* | (a) Report numbers of individuals at each stage of study—eg numbers potentially eligible, examined for eligibility, confirmed eligible, included in the study, completing follow-up, and analysed            | 7,11,14 |
|                          |     | (b) Give reasons for non-participation at each stage                                                                                                                                                         | NA      |
|                          |     | (c) Consider use of a flow diagram                                                                                                                                                                           | NA      |
| Descriptive data         | 14* | (a) Give characteristics of study participants (eg demographic, clinical, social) and information on exposures and potential confounders                                                                     | 13      |
|                          |     | (b) Indicate number of participants with missing data for each variable of interest                                                                                                                          | NA      |
|                          |     | (c) Summarise follow-up time (eg, average and total amount)                                                                                                                                                  | NA      |
| Outcome data             | 15* | Report numbers of outcome events or summary measures over time                                                                                                                                               | 13-15   |
| Main results             | 16  | (a) Give unadjusted estimates and, if applicable, confounder-adjusted estimates and their precision (eg, 95% confidence interval). Make clear which confounders were adjusted for and why they were included | 13-15   |
|                          |     | (b) Report category boundaries when continuous variables were categorized                                                                                                                                    | 13-15   |
|                          |     | (c) If relevant, consider translating estimates of relative risk into absolute risk for a meaningful time period                                                                                             | NA      |
| Other analyses           | 17  | Report other analyses done—eg analyses of subgroups and interactions, and sensitivity analyses                                                                                                               | 13-15   |
| <b>Discussion</b>        |     |                                                                                                                                                                                                              | 16-18   |
| Key results              | 18  | Summarise key results with reference to study objectives                                                                                                                                                     | 16-18   |
| <b>Limitations</b>       |     |                                                                                                                                                                                                              | 17-18   |
| Interpretation           | 20  | Give a cautious overall interpretation of results considering objectives, limitations, multiplicity of analyses, results from similar studies, and other relevant evidence                                   | 17-18   |
| Generalisability         | 21  | Discuss the generalisability (external validity) of the study results                                                                                                                                        | 17-18   |
| <b>Other information</b> |     |                                                                                                                                                                                                              | NA      |
| Funding                  | 22  | Give the source of funding and the role of the funders for the present study and, if applicable, for the original study on which the present article is based                                                | 23      |

\*Give information separately for cases and controls in case-control studies and, if applicable, for exposed and unexposed groups in cohort and cross-sectional studies.

**Note:** An Explanation and Elaboration article discusses each checklist item and gives methodological background and published examples of transparent reporting. The STROBE checklist is best used in conjunction with this article (freely available on the Web sites of PLoS Medicine at <http://www.plosmedicine.org/>, Annals of Internal Medicine at <http://www.annals.org/>, and Epidemiology at <http://www.epidem.com/>). Information on the STROBE Initiative is available at [www.strobe-statement.org](http://www.strobe-statement.org).

# BMJ Open

## Epidemiological evidence for a hereditary contribution to myasthenia gravis: a retrospective cohort study of patients from North America

|                               |                                                                                                                                                                                                                                                                                                                                                                                                                                                                                                                                                                                                                                                                                                                                                                                                                                                                                                                                                                                                                                                                                                                                                                                                                                                                                                                                                                                                                                                                                                                                                                                                                                                                                                                                                                                                                                                                                                                                                                                                                                            |
|-------------------------------|--------------------------------------------------------------------------------------------------------------------------------------------------------------------------------------------------------------------------------------------------------------------------------------------------------------------------------------------------------------------------------------------------------------------------------------------------------------------------------------------------------------------------------------------------------------------------------------------------------------------------------------------------------------------------------------------------------------------------------------------------------------------------------------------------------------------------------------------------------------------------------------------------------------------------------------------------------------------------------------------------------------------------------------------------------------------------------------------------------------------------------------------------------------------------------------------------------------------------------------------------------------------------------------------------------------------------------------------------------------------------------------------------------------------------------------------------------------------------------------------------------------------------------------------------------------------------------------------------------------------------------------------------------------------------------------------------------------------------------------------------------------------------------------------------------------------------------------------------------------------------------------------------------------------------------------------------------------------------------------------------------------------------------------------|
| Journal:                      | <i>BMJ Open</i>                                                                                                                                                                                                                                                                                                                                                                                                                                                                                                                                                                                                                                                                                                                                                                                                                                                                                                                                                                                                                                                                                                                                                                                                                                                                                                                                                                                                                                                                                                                                                                                                                                                                                                                                                                                                                                                                                                                                                                                                                            |
| Manuscript ID                 | bmjopen-2020-037909.R1                                                                                                                                                                                                                                                                                                                                                                                                                                                                                                                                                                                                                                                                                                                                                                                                                                                                                                                                                                                                                                                                                                                                                                                                                                                                                                                                                                                                                                                                                                                                                                                                                                                                                                                                                                                                                                                                                                                                                                                                                     |
| Article Type:                 | Original research                                                                                                                                                                                                                                                                                                                                                                                                                                                                                                                                                                                                                                                                                                                                                                                                                                                                                                                                                                                                                                                                                                                                                                                                                                                                                                                                                                                                                                                                                                                                                                                                                                                                                                                                                                                                                                                                                                                                                                                                                          |
| Date Submitted by the Author: | 29-May-2020                                                                                                                                                                                                                                                                                                                                                                                                                                                                                                                                                                                                                                                                                                                                                                                                                                                                                                                                                                                                                                                                                                                                                                                                                                                                                                                                                                                                                                                                                                                                                                                                                                                                                                                                                                                                                                                                                                                                                                                                                                |
| Complete List of Authors:     | <p>Green, Joshua; National Institute on Aging Intramural Research Program, Neuromuscular Diseases Research Unit, Laboratory of Neurogenetics</p> <p>Barohn, Richard; University of Kansas Medical Center, Department of Neurology</p> <p>Bartoccion, Emanuela; Catholic University, Fondazione Policlinico Universitario "A. Gemelli" - I.R.C.C.S, Institute of General Pathology</p> <p>Benetar, Michael; University of Miami, Department of Neurology</p> <p>Blackmore, Derrick; University of Alberta Hospital, Department of Medicine</p> <p>Chaudhry, Vinay; Johns Hopkins School of Medicine, Department of Neurology</p> <p>Chopra, Manisha ; University of North Carolina at Chapel Hill, Department of Neurology</p> <p>Corse, Andrea; Johns Hopkins School of Medicine, Department of Neurology</p> <p>Dimachkie, Mazen M.; University of Kansas Medical Center, Department of Neurology</p> <p>Evoli, Amelia ; Policlinico A. Gemelli IRCSS, Università Cattolica del S. Cuore, Istituto di Neurologia</p> <p>Florence , Julaine ; Washington University School of Medicine in Saint Louis, Department of Neurology</p> <p>Freimer , Miriam ; Ohio State University Medical Center, Department of Neurology</p> <p>Howard, James ; University of North Carolina at Chapel Hill, Department of Neurology</p> <p>Jiwa, Theresa; University of British Columbia, Division of Neurology</p> <p>Kaminski , Henry ; George Washington University</p> <p>Kissel, JT; Ohio State University Medical Center, Department of Neurology</p> <p>Koopman, Wilma; London Health Sciences Centre, Department of Clinical Neurosciences,</p> <p>Lipscomb, Bernadette ; Duke University Medical Center, Department of Neurology</p> <p>Maestri , Michelangelo ; University of Pisa, Department of Neuroscience</p> <p>Marino, Mariapaola ; Catholic University, Fondazione Policlinico Universitario "A. Gemelli" - I.R.C.C.S., Institute of General Pathology</p> <p>Massey, Janice; Duke University Medical Center, Department of Neurology</p> |

|                                 |                                                                                                                                                                                                                                                                                                                                                                                                                                                                                                                                                                                                                                                                                                                                                                                                                                                                                                                                                                                                                                                                                                                                                                                                                                                                                                                                                                                                                                                                                                                                                                                                                                                                                                                                                                                                           |
|---------------------------------|-----------------------------------------------------------------------------------------------------------------------------------------------------------------------------------------------------------------------------------------------------------------------------------------------------------------------------------------------------------------------------------------------------------------------------------------------------------------------------------------------------------------------------------------------------------------------------------------------------------------------------------------------------------------------------------------------------------------------------------------------------------------------------------------------------------------------------------------------------------------------------------------------------------------------------------------------------------------------------------------------------------------------------------------------------------------------------------------------------------------------------------------------------------------------------------------------------------------------------------------------------------------------------------------------------------------------------------------------------------------------------------------------------------------------------------------------------------------------------------------------------------------------------------------------------------------------------------------------------------------------------------------------------------------------------------------------------------------------------------------------------------------------------------------------------------|
|                                 | <p>McVey , April ; University of Kansas Medical Center, Department of Neurology</p> <p>Mezei , Michelle ; The University of British Columbia, Division of Neurology</p> <p>Muppidi , Srikanth ; Stanford University, Department of Neurology and Neurosciences</p> <p>Nicolle, Michael ; London Health Sciences Centre, Division of Neurology</p> <p>Oger, Joel; The University of British Columbia, Division of Neurology</p> <p>Pascuzzi , Robert ; Indiana University Purdue University at Indianapolis, Department of Neurology</p> <p>Pasnoor , Mamatha ; University of Kansas Medical Center, Department of Neurology</p> <p>Pestronk , Alan ; Washington University School of Medicine in Saint Louis, Department of Neurology</p> <p>Provenzano , Carlo ; Catholic University, Fondazione Policlinico Universitario "A. Gemelli" - I.R.C.C.S, Institute of General Pathology</p> <p>Ricciardi , Roberta ; University of Pisa, Department of Neuroscience</p> <p>Richman, DP; Center for Neuroscience, University of California, Neurology</p> <p>Rowin, Julie ; APAC Centers for Pain Management Wellness and Integrative Neurology</p> <p>Sanders, Donald ; Duke University Medical Center, Department of Neurology</p> <p>Siddiqi , Zaeem ; University of Alberta Hospital, Department of Medicine</p> <p>Soloway, Aimee ; University of Alberta Hospital, Department of Medicine</p> <p>Wolfe, Gil ; State University of New York at Buffalo, Department of Neurology</p> <p>Wulf, Charlie; Washington University School of Medicine in Saint Louis, Department of Neurology</p> <p>Drachman, Daniel ; Johns Hopkins School of Medicine</p> <p>Traynor, Bryan ; National Institute on Aging Intramural Research Program, Neuromuscular Diseases Research Unit, Laboratory of Neurogenetics</p> |
| <b>Primary Subject Heading</b>: | Epidemiology                                                                                                                                                                                                                                                                                                                                                                                                                                                                                                                                                                                                                                                                                                                                                                                                                                                                                                                                                                                                                                                                                                                                                                                                                                                                                                                                                                                                                                                                                                                                                                                                                                                                                                                                                                                              |
| Secondary Subject Heading:      | Neurology                                                                                                                                                                                                                                                                                                                                                                                                                                                                                                                                                                                                                                                                                                                                                                                                                                                                                                                                                                                                                                                                                                                                                                                                                                                                                                                                                                                                                                                                                                                                                                                                                                                                                                                                                                                                 |
| Keywords:                       | EPIDEMIOLOGY, Neuromuscular disease < NEUROLOGY, GENETICS, Neurology < INTERNAL MEDICINE, Neurogenetics < NEUROLOGY                                                                                                                                                                                                                                                                                                                                                                                                                                                                                                                                                                                                                                                                                                                                                                                                                                                                                                                                                                                                                                                                                                                                                                                                                                                                                                                                                                                                                                                                                                                                                                                                                                                                                       |
|                                 |                                                                                                                                                                                                                                                                                                                                                                                                                                                                                                                                                                                                                                                                                                                                                                                                                                                                                                                                                                                                                                                                                                                                                                                                                                                                                                                                                                                                                                                                                                                                                                                                                                                                                                                                                                                                           |

SCHOLARONE™  
Manuscripts



I, the Submitting Author has the right to grant and does grant on behalf of all authors of the Work (as defined in the below author licence), an exclusive licence and/or a non-exclusive licence for contributions from authors who are: i) UK Crown employees; ii) where BMJ has agreed a CC-BY licence shall apply, and/or iii) in accordance with the terms applicable for US Federal Government officers or employees acting as part of their official duties; on a worldwide, perpetual, irrevocable, royalty-free basis to BMJ Publishing Group Ltd ("BMJ") its licensees and where the relevant Journal is co-owned by BMJ to the co-owners of the Journal, to publish the Work in this journal and any other BMJ products and to exploit all rights, as set out in our [licence](#).

The Submitting Author accepts and understands that any supply made under these terms is made by BMJ to the Submitting Author unless you are acting as an employee on behalf of your employer or a postgraduate student of an affiliated institution which is paying any applicable article publishing charge ("APC") for Open Access articles. Where the Submitting Author wishes to make the Work available on an Open Access basis (and intends to pay the relevant APC), the terms of reuse of such Open Access shall be governed by a Creative Commons licence – details of these licences and which [Creative Commons](#) licence will apply to this Work are set out in our licence referred to above.

Other than as permitted in any relevant BMJ Author's Self Archiving Policies, I confirm this Work has not been accepted for publication elsewhere, is not being considered for publication elsewhere and does not duplicate material already published. I confirm all authors consent to publication of this Work and authorise the granting of this licence.

1  
2  
3 Epidemiological evidence for a hereditary contribution to myasthenia gravis: a  
4 retrospective cohort study of patients from North America  
5  
6  
7  
8  
9

10 Joshua D. Green, BS; Richard J. Barohn, MD; Emanuela Bartoccion, PhD; Michael  
11 Benetar, MD, PhD; Derrick Blackmore, BSc; Vinay Chaudhry, MD; Manisha Chopra,  
12 MD; Andrea Corse, MD; Mazen M. Dimachkie, MD; Amelia Evoli, MD; Julaine Florence,  
13 PT, MHS, DPT; Miriam Freimer, MD; James F. Howard Jr, MD; Theresa Jiwa; Henry J.  
14 Kaminski, MD; John Kissel, MD; Wilma J. Koopman, RN; Bernadette Lipscomb, RN;  
15 Michelangelo Maestri, MD; Mariapaola Marino, MD; Janice M. Massey, MD; April McVey,  
16 MD; Michelle M. Mezei, MD; Srikanth Muppidi, MD; Michael W. Nicolle, MD; Joel Oger,  
17 MD; Mamatha Pasnoor, MD; Alan Pestronk, MD; Carlo Provenzano, MD, PhD; Roberta  
18 Ricciardi, MD; David P. Richman, MD; Julie Rowin, MD; Donald B. Sanders, MD;  
19 Zaeem Siddiqi, MD; Aimee Soloway, RN; Gil I. Wolfe, MD; Charlie Wulf, BS; Daniel B.  
20 Drachman, MD\*; and Bryan J. Traynor, MD, PhD\*  
21  
22  
23  
24  
25  
26  
27  
28  
29  
30  
31  
32  
33  
34

35 \* These authors contributed equally to the manuscript.  
36  
37  
38  
39

40 **Author Contributions:** The study concept and design were proposed by DBD and BJT.  
41 The acquisition, analysis, and/or interpretation of data provided done by all authors. The  
42 manuscript was drafted by JDG and BJT. Critical revisions, intellectual contributions,  
43 and final approval were provided by DBD, RJB, EB, MB, DB, VC, MC, AC, MD, AE, JF,  
44 MF, JH, TJ, HJK, JK, WJK, BL, MM, MM, JMM, AM, MM, SM, MN, JO, MP, AP, CP,  
45 RR, DR, JR, DBS, ZS, AS, GIW, and CW. The statistical analysis for this study was  
46 provided by JDG.  
47  
48  
49  
50  
51  
52  
53  
54  
55  
56  
57  
58  
59  
60

## Affiliations

Joshua D. Green, Neuromuscular Diseases Research Unit, Laboratory of Neurogenetics, National Institute on Aging, National Institutes of Health, Porter Neuroscience Research Center, Bethesda, Maryland

Richard J. Barohn, Department of Neurology, University of Kansas Medical Center, Kansas City

Emanuela Bartoccion, Institute of General Pathology, Catholic University, Fondazione Policlinico Universitario "A. Gemelli" - I.R.C.C.S, Rome, Italy.

Michael Benetar, Department of Neurology, University of Miami, Miami, Florida

Derrick Blackmore, Department of Medicine, University of Alberta Hospital, Edmonton, Alberta, Canada

Vinay Chaudhry, Department of Neurology, Johns Hopkins School of Medicine, Baltimore, Maryland

Manisha Chopra, Department of Neurology, University of North Carolina, Chapel Hill

Andrea Corse, Department of Neurology, Johns Hopkins School of Medicine, Baltimore, Maryland

Mazen M. Dimachkie, Department of Neurology, University of Kansas Medical Center, Kansas City, Kansas

Amelia Evoli, Istituto di Neurologia, Policlinico A. Gemelli IRCSS, Università Cattolica del S. Cuore, Roma, Italy

Julaine Florence, Department of Neurology, Washington University School of Medicine,

1  
2  
3 St Louis, Missouri

4  
5 Miriam Freimer, Department of Neurology, Ohio State University Medical Center,  
6  
7  
8 Columbus

9  
10 James F. Howard Jr, Department of Neurology, University of North Carolina, Chapel Hill

11  
12 Theresa Jiwa, Division of Neurology, University of British Columbia, Vancouver, British  
13  
14 Columbia, Canada

15  
16 Henry J. Kaminski, Department of Neurology, George Washington University,  
17  
18 Washington, DC

19  
20 John Kissel, Department of Neurology, Ohio State University Medical Center, Columbus

21  
22 Wilma J. Koopman, Department of Clinical Neurosciences, London Health Sciences  
23  
24 Centre, London, Ontario, Canada

25  
26 Bernadette Lipscomb, Department of Neurology, Duke University Medical Center,  
27  
28 Durham, North Carolina

29  
30 Michelangelo Maestri, Department of Neuroscience, Cisanello Hospital, University of  
31  
32 Pisa, Pisa, Italy

33  
34 Mariapaola Marino, Institute of General Pathology, Catholic University, Fondazione  
35  
36 Policlinico Universitario "A. Gemelli" - I.R.C.C.S, Rome, Italy.

37  
38 Janice M. Massey, Department of Neurology, Duke University Medical Center, Durham,  
39  
40 North Carolina

41  
42 April McVey, Department of Neurology, University of Kansas Medical Center, Kansas  
43  
44 City

45  
46 Michelle M. Mezei, Division of Neurology, University of British Columbia, Vancouver,  
47  
48 British Columbia, Canada



1  
2  
3 Srikanth Muppidi, Clinical Associate Professor, Dept of Neurology and Neurosciences.  
4  
5 Stanford University  
6

7 Michael W. Nicolle, Department of Clinical Neurosciences, London Health Sciences  
8  
9 Centre, London, Ontario, Canada  
10

11  
12 Joel Oger, Division of Neurology, University of British Columbia, Vancouver, British  
13  
14 Columbia, Canada  
15

16  
17 Robert M. Pascuzzi, Department of Neurology, Indiana University–Purdue University,  
18  
19 Indianapolis  
20

21  
22 Mamatha Pasnoor, Department of Neurology, University of Kansas Medical Center,  
23  
24 Kansas City  
25

26  
27 Alan Pestronk, Department of Neurology, Washington University School of Medicine, St  
28  
29 Louis, Missouri  
30

31  
32 Carlo Provenzano, Institute of General Pathology, Catholic University, Fondazione  
33  
34 Policlinico Universitario "A. Gemelli" - I.R.C.C.S, Rome, Italy.  
35

36  
37 Roberta Ricciardi, Department of Neuroscience, Cisanello Hospital, University of Pisa,  
38  
39 Pisa, Italy  
40

41  
42 David P. Richman, Department of Neurology, University of California, Davis  
43

44  
45 Julie Rowin, APAC Centers for Pain Management Wellness and Integrative Neurology  
46  
47 Westchester, Illinois  
48

49  
50 Donald B. Sanders, Department of Neurology, Duke University Medical Center,  
51  
52 Durham, North Carolina  
53

54  
55 Zaeem Siddiqi, Department of Medicine, University of Alberta Hospital, Edmonton,  
56  
57 Alberta, Canada  
58  
59

1  
2  
3 Aimee Soloway, Department of Medicine, University of Alberta Hospital, Edmonton,  
4  
5 Alberta, Canada  
6

7  
8 Gil I. Wolfe, Department of Neurology, University at Buffalo Jacobs SMBS, State  
9  
10 University of New York, Buffalo  
11

12  
13 Charlie Wulf, Department of Neurology, Washington University School of Medicine, St  
14  
15 Louis, Missouri  
16

17  
18 Daniel Drachman, Department of Neurology, Johns Hopkins School of Medicine,  
19  
20 Baltimore, Maryland  
21

22  
23 Bryan J. Traynor, Neuromuscular Diseases Research Unit, Laboratory of  
24  
25 Neurogenetics, National Institute on Aging, National Institutes of Health, Porter  
26  
27 Neuroscience Research Center, Bethesda, Maryland  
28  
29

30  
31 **Corresponding Author:**  
32

33 Bryan J. Traynor MD PhD,  
34

35 35 Convent Drive, Room 1A-213, Bethesda, MD 20892-3707.  
36

37 *Phone:* 301-451-7606.  
38

39 traynorb@mail.nih.gov  
40  
41  
42  
43

44  
45 **Author Contact Information:**  
46

47 Joshua D. Green josh.green@nih.gov  
48

49 Richard J. Barohn rbarohn@kumc.edu  
50

51 Emanuela Bartoccion ebartoc@gmail.com  
52

53  
54 Michael Benetar MBenatar@med.miami.edu  
55  
56  
57  
58  
59

1  
2  
3 Derrick Blackmore dblackmo@ualberta.ca  
4  
5 Vinay Chaudhry vchaudh@jhmi.edu  
6  
7 Manisha Chopra chopram@neurology.unc.edu  
8  
9  
10 Andrea Corse acorse@jhmi.edu  
11  
12 Mazen M. Dimachkie mdimachkie@kumc.edu  
13  
14 Amelia Evoli amelia.evoli@unicatt.it  
15  
16  
17 Julaine Florence florencej@neuro.wustl.edu  
18  
19 Miriam Freimer miriam.freimer@osumc.edu  
20  
21 James F. Howard Jr howardj@neurology.unc.edu  
22  
23  
24 Theresa Jiwa theresajiwa@shaw.ca  
25  
26 Henry J. Kaminski henrykaminski@gmail.com  
27  
28 John Kissel John.Kissel@osumc.edu  
29  
30  
31 Wilma J. Koopman wkoopman@uwo.ca  
32  
33 Bernadette Lipscomb btlipscomb@gmail.com  
34  
35 Michelangelo Maestri michelangelo.mvg@tin.it  
36  
37 Mariapaola Marino mariapaola.marino@unicatt.it  
38  
39  
40 Janice M. Massey masse005@mc.duke.edu  
41  
42 April McVey aprillynnmcvey@gmail.com  
43  
44 Michelle M. Mezei mezei@mail.ubc.ca  
45  
46 Srikanth Muppidi muppidis@stanford.edu  
47  
48  
49 Michael W. Nicolle mnicolle@uwo.ca  
50  
51 Joel Oger joel.oger@ubc.ca  
52  
53 Robert M. Pascuzzi rpascuzz@iupui.edu  
54  
55  
56  
57  
58  
59  
60

1  
2  
3 Mamatha Pasnoor mpasnoor@kumc.edu  
4

5 Alan Pestronk pestronka@neuro.wustl.edu  
6

7 Carlo Provenzano carlo.provenzano@unicatt.it  
8

9  
10 Roberta Ricciardi r.ricciardi@ao-pisa.toscana.it  
11

12 David P. Richman dprichman@ucdavis.edu  
13

14 Julie Rowin jrowin@apacgroupe.com  
15

16 Donald B. Sanders sande007@mc.duke.edu  
17

18 Zaeem Siddiqi zsiddiqi@ualberta.ca  
19

20 Aimee Soloway Aimee.Soloway@albertahealthservices.ca  
21

22 Gil I. Wolfe gilwolfe@buffalo.edu  
23

24 Charlie Wulf wulfc@neuro.wustl.edu  
25

26 Daniel Drachman dandrac@aol.com  
27

28 Bryan J. Traynor traynorb@mail.nih.gov  
29  
30  
31  
32  
33  
34

35 Submission Type: **Original Research**  
36

37 Title Character count: **136**  
38

39 Number of Tables: **3**  
40

41 Number of Figures: **2**  
42

43 Number of References: **21**  
44

45 Word count of Abstract: **169**  
46

47 Word count of Paper: **2097**  
48  
49  
50  
51  
52  
53  
54  
55  
56  
57  
58  
59  
60

1  
2  
3 **Statistical analysis:** conducted by Joshua Green, BS, and Dr. Bryan Traynor, MD,  
4  
5 PhD, National Institutes of Health.  
6  
7  
8  
9  
10  
11  
12  
13  
14  
15  
16

## 17 **ABSTRACT**

18  
19 **Objectives** To approximate the rate of familial myasthenia gravis and the coexistence  
20  
21 of other autoimmune disorders in the patients and their families.  
22

23  
24 **Design** Retrospective cohort study  
25

26  
27 **Setting** Clinics across North America  
28

29  
30 **Participants** The study included 1,032 patients diagnosed with acetylcholine receptor  
31  
32 antibody (AChR)-positive myasthenia gravis

33  
34 **Methods** Phenotype information of 1,032 patients diagnosed with acetylcholine  
35  
36 receptor antibody (AChR)-positive myasthenia gravis was obtained from clinics at  
37  
38 fourteen centers across North America between January 2010 and January 2011. A  
39  
40 critical review of the epidemiological literature on the familial rate of myasthenia gravis  
41  
42 was also performed.  
43

44  
45 **Results** Among 1,032 patients, 58 (5.6%) reported a family history of myasthenia  
46  
47 gravis. A history of autoimmune diseases was present in 26.6% of patients and in  
48  
49 28.4% of their family members.  
50

51  
52 **Discussion** The familial rate of myasthenia gravis was higher than would be expected  
53  
54 for a sporadic disease. Furthermore, a high proportion of patients had a personal or  
55  
56  
57  
58  
59  
60

1  
2  
3 family history of autoimmune disease. Taken together, these findings suggest a genetic  
4  
5 contribution to the pathogenesis of myasthenia gravis.  
6  
7  
8  
9  
10

## 11 12 **ARTICLE SUMMARY**

### 13 14 **Strengths and limitations of this study**

- 15  
16  
17 • A strength of this study is that it analyzes a large cohort of myasthenia gravis  
18 patients with complete data on each patient, allowing multiple clinical correlations  
19 to be made.  
20  
21
- 22  
23  
24 • A strength of this study is that standardized criteria were used to diagnose  
25 patients with myasthenia gravis, including establishing the specific subtype of the  
26 disease for each patient.  
27  
28
- 29  
30  
31 • A strength of this study is that the cohort of myasthenia gravis patients was  
32 sufficiently large to allow the generation of evidence confirming a genetic  
33 contribution to the disease.  
34  
35
- 36  
37  
38 • A limitation of this study is the reliance on self-reported family history status for  
39 both myasthenia gravis and other autoimmune diseases by the patients.  
40  
41
- 42  
43 • A limitation of this study is its retrospective design, which precludes ascertaining  
44 additional information from individual patients.  
45  
46  
47  
48  
49  
50  
51  
52  
53  
54  
55  
56  
57  
58  
59  
60

## INTRODUCTION

Myasthenia gravis is a rare autoimmune disease that is characterized by antibody-mediated interference with neuromuscular transmission at the neuromuscular junction. Originally, the role for an autoimmune attack against the acetylcholine receptor (AChR) on the postsynaptic side of the neuromuscular junction was recognized.<sup>1</sup> However, over the past decade, additional autoimmune targets have been identified: muscle-specific tyrosine kinase (MuSK), agrin, and lipoprotein receptor-related protein 4 (LRP4).<sup>2-4</sup> All of these proteins play essential roles in maintaining the structure and function of the neuromuscular junction.

Myasthenia gravis manifests clinically with muscle weakness and fatigability. Symptoms of ocular muscle weakness are observed early in 85% of myasthenic patients.<sup>5</sup> These symptoms include diplopia and/or ptosis. Weakness of the bulbar musculature is observed in 60% of myasthenic patients, with symptoms including dysarthria and/or dysphagia.<sup>5</sup>

A recent literature review of thirty-one epidemiological studies suggests that the annual incidence of myasthenia gravis may range between 3 and 30 cases per million people.<sup>6</sup> A common theme among myasthenia gravis epidemiological studies is that there is a significant degree of variability between cohorts. For example, a study of a Hong Kong Chinese cohort reported an incidence of 4 per million people per year, whereas a study of an English cohort reported an incidence of 30 per million people per year.<sup>7, 8</sup> This substantial degree of variability may be the result of inconsistent diagnostic criteria, varying case ascertainment, lack of physician awareness concerning myasthenia gravis, or it may reflect different occurrence across populations.

1  
2  
3 Historically, adult-onset myasthenia gravis has been regarded as a sporadic  
4 disease with only a minimal genetic component.<sup>9</sup> However, genome-wide association  
5 studies, fine-mapping studies, and epidemiological studies of myasthenia gravis  
6 suggest a genetic contribution to the disease.<sup>10, 11</sup> In fact, studies have described  
7 myasthenic patients with a family history of myasthenia gravis and/or a family history of  
8 autoimmune diseases.<sup>12-16</sup> In this study, we performed a literature search of the familial  
9 rate reported by myasthenia gravis epidemiological studies and, using our cohort of  
10 1,032 North American myasthenia gravis patients, approximated the prevalence of  
11 familial myasthenia gravis, compared the characteristics of familial disease with  
12 sporadic disease, and assessed the co-morbidity of other autoimmune diseases among  
13 patients and among their families.  
14  
15  
16  
17  
18  
19  
20  
21  
22  
23  
24  
25  
26  
27  
28  
29  
30

## 31 **METHODS**

### 32 **Patient ascertainment**

33 Phenotype information of 1,032 patients diagnosed with myasthenia gravis was  
34 obtained from myasthenia gravis clinics at fourteen centers across North America  
35 between January 2010 and January 2011.<sup>10</sup> The numbers of myasthenia gravis patients  
36 attending each of these clinics was not available for this study. Patients were diagnosed  
37 by neurologists specializing in myasthenia gravis. Each myasthenia gravis diagnosis  
38 was based on standard clinical criteria that included, but was not limited to, weakness,  
39 fatigability, and electrophysiological, pharmacological (edrophonium test) and/or  
40 serological abnormalities. Inclusion criteria for this study were as follows: confirmed  
41 diagnosis of myasthenia gravis, non-Hispanic white ethnicity, and presence of anti-  
42  
43  
44  
45  
46  
47  
48  
49  
50  
51  
52  
53  
54  
55  
56  
57  
58  
59  
60



1  
2  
3 AChR antibodies. Patients with anti-MuSK antibodies were excluded from the study.  
4  
5 The LRP4 antibody was discovered after the collection of the cohort was complete.  
6  
7 Thus, the LRP4 antibody status of the patients was not known. Family histories of  
8  
9 myasthenia gravis and other autoimmune diseases were systematically obtained for  
10  
11 each subject using a simple structured questionnaire (Table S1). A positive family  
12  
13 history was defined as having a first-degree (~50% of DNA in common), second-degree  
14  
15 (~25% of DNA in common), or third-degree (~12.5% of DNA in common) relative with  
16  
17 the disease. DNA samples were collected from each subject and used for genetic  
18  
19 analyses as previously reported.<sup>10</sup> Patients with genetic forms of myasthenia gravis  
20  
21 were not explicitly excluded, though none of the cohort was known to have such a  
22  
23 mutation.  
24  
25  
26  
27  
28  
29  
30

### 31 **Literature review methodology**

32  
33 To find studies about the epidemiology of familial myasthenia gravis, the PubMed and  
34  
35 Medline databases were searched using permutations of search terms: 'epidemiology of  
36  
37 familial myasthenia gravis', 'epidemiology of myasthenia gravis', and 'heritability of  
38  
39 myasthenia gravis'. After reviewing thirty-one epidemiology studies between the years  
40  
41 of 1950 through 2018, only ten studies explicitly referenced the family history of  
42  
43 myasthenic patients. Five of those papers provided metrics about family members with  
44  
45 myasthenia gravis.<sup>12-16</sup>  
46  
47  
48  
49  
50

### 51 **Patient and public involvement statement**

52  
53 No patients or members of the public were actively involved with co-producing the  
54  
55  
56  
57  
58  
59  
60

1  
2  
3 research presented in this article.  
4  
5  
6  
7

### 8 **Statement of ethics approval**

9  
10 Written informed consent was obtained from all patients who participated in this study.

11  
12 Institution review board (IRB) approval was obtained at all participating institutions.

13  
14 Lead institutes for IRB = National Institutes of Health, protocol 03-AG-N329,

15  
16 <https://clinicaltrials.gov/ct2/show/NCT02014246>  
17  
18  
19  
20

### 21 **Data availability**

22  
23 The data, consisting of patient family history of myasthenia gravis and other  
24  
25 autoimmune diseases in addition to patient personal history of other autoimmune  
26  
27 diseases, are not publicly available because of patient privacy concerns but de-  
28  
29 identified participant data are available upon request by contacting the corresponding  
30  
31 author. In the interests of scientific rigor, the code used for analysis of the dataset is  
32  
33 available on GitHub: <https://github.com/neurogenetics/Familial-Myasthenia-Gravis>.  
34  
35  
36  
37  
38  
39

## 40 **RESULTS**

### 41 **North American cohort of myasthenia gravis patients**

42  
43 Clinical data were collected from a total of 1,032 patients across fourteen centers in  
44  
45 North America and were analyzed in this study. All of the patients had positive anti-  
46  
47 AChR antibodies. The median age of symptom onset in this clinic-based cohort was 58  
48  
49 years of age (range = 4-91; median onset age for females = 46; median onset age for  
50  
51 males = 62). The female-to-male ratio was 1:1.27. Early-onset disease (< 40 years of  
52  
53  
54  
55  
56  
57  
58  
59  
60

1  
2  
3 age) was observed among 248 (24.0%) of the cohort. Consistent with other reports,  
4  
5 nearly one third of the patients in our North American study cohort (305, 29.6%) had  
6  
7 undergone thymectomy.  
8  
9

10 Fifty-eight (5.6%) patients had a family history of myasthenia gravis. Sibling-  
11  
12 sibling (31.0%) and parent-child (32.8%) were the most common type of familial  
13  
14 relationship, followed by uncle/aunt-nephew/niece (13.8%), cousin-cousin (12.1%) and  
15  
16 grandparent-grandchild (5.2%) relationships. Of note, the indicated percentage of  
17  
18 parent-child cases might be inflated because neonatal myasthenia gravis cases (which  
19  
20 are not believed to be genetic) could not be discerned from non-neonatal cases. Age at  
21  
22 symptom onset was similar among patients with a family history compared to patients  
23  
24 without a family history (57.5 years of age, range = 8-80 years versus 58.5 years, range  
25  
26 = 4-91 years, p-value = 0.183, Wilcoxon rank sum test, figure 1, table 1).  
27  
28  
29  
30  
31  
32  
33  
34  
35  
36  
37  
38  
39  
40  
41  
42  
43  
44  
45  
46  
47  
48  
49  
50  
51  
52  
53  
54  
55  
56  
57  
58  
59  
60

**Table 1.** Comparison of familial and sporadic cases among a cohort of patients diagnosed with myasthenia gravis (n = 1,032)

|                                                                              | <b>Familial</b> | <b>Sporadic</b> | <b>P-value</b> |
|------------------------------------------------------------------------------|-----------------|-----------------|----------------|
| <b>Number of myasthenia gravis cases (percent)</b>                           | 58 (5.6)        | 974 (94.4)      | -              |
| <b>Median age of disease onset (years) (range)</b>                           | 57.5 (8-80)     | 58.5 (4-91)     | 0.183          |
| <b>Number of patients with early-onset disease (&lt; 40 years) (percent)</b> | 15 (25.9)       | 233 (23.9)      | 0.86           |
| <b>Number of females (percent)</b>                                           | 25 (43.1)       | 429 (44.0)      | 0.997          |

A personal history of an autoimmune disease other than myasthenia gravis was reported in 275 (26.6%) of study participants. A total of 293 (28.4%) subjects had a family history of an autoimmune disease. The prevalence of autoimmunity in the general population is ~3-9%, indicating that the rates observed among our myasthenia gravis subjects are significantly increased.<sup>17</sup> A breakdown of the specific autoimmune diseases

1  
2  
3 for both personal history and family history of disease is shown in figure 2A and figure  
4  
5 2B.  
6

7  
8 The most common autoimmune diseases present concomitantly in myasthenia  
9  
10 gravis patients were thyroid disease (n = 118, 11.4%), hematological disease (n = 33,  
11  
12 3.2% consisting of autoimmune hemolytic anemia and autoimmune thrombocytopenic  
13  
14 purpura), and rheumatoid arthritis (n=28, 2.7%). This was similar to the rates previously  
15  
16 reported by Mao et al (figure 2C).<sup>18</sup>  
17  
18

19 The three most common autoimmune diseases present in the families of  
20  
21 myasthenia gravis patients were thyroid disease (n=98, 9.5%), rheumatoid arthritis  
22  
23 (n=68, 6.6%), and type 1 diabetes (n=36, 3.5%).  
24  
25  
26  
27

## 28 **Literature review**

29  
30 Literature review concerning the epidemiology of familial myasthenia gravis identified  
31  
32 five studies that discussed the patient's family history of myasthenia gravis with sample  
33  
34 sizes that ranged from 264 to 6,638 (table 2).<sup>12-16</sup> The frequency of familial myasthenia  
35  
36 gravis ranged from 0.2% to 7.2% across studies, the upper limit having been reported  
37  
38 based on a Finnish cohort.<sup>15</sup> Among these, three studies reported that familial  
39  
40 myasthenia gravis cases had an earlier symptom onset age than the sporadic cases.<sup>12,</sup>  
41  
42  
43  
44  
45  
46  
47  
48  
49  
50  
51  
52  
53  
54  
55  
56  
57  
58  
59  
60  
14, 15 Only three studies reported on the patient history of other autoimmune diseases  
and/or on the family history of other autoimmune diseases.<sup>12, 14, 15</sup> Among these, thyroid  
disease, rheumatoid arthritis, systemic lupus erythematosus, and Sjogren's syndrome  
were the most common other autoimmune diseases reported in patients' personal  
and/or family histories. <sup>12, 14, 15</sup>

**Table 2.** Studies reporting the rate of familial disease in myasthenia gravis.

| Source | Origin        | Sample size | Familial rate | Study type |
|--------|---------------|-------------|---------------|------------|
| 12     | Taiwan        | 6,638       | 0.2%          | Population |
| 13     | Japan         | 3,141       | 0.7%          | Population |
| 14     | Spain         | 462         | 3.5%          | Clinic     |
| 15     | Finland       | 264         | 7.2%          | Population |
| 16     | United States | 702         | 3.8%          | Clinic     |

## DISCUSSION

We found the prevalence of familial myasthenia gravis in our North American cohort to be 5.6%. This is comparable to the prevalence reported in other studies, where the frequency ranged from 0.2% to 7.2% of myasthenia gravis patients having a family history of myasthenia gravis depending on the cohort studied.<sup>12-16</sup> Although the vast majority of myasthenia gravis cases are still non-familial, a prevalence of 5.6% represents a several hundred-fold increase for a disease with an overall prevalence of 1 in 5-10,000.<sup>5</sup> The two studies of myasthenia gravis based on Asian cohorts reported substantially lower rates of familial disease compared to our North American cohort and

1  
2  
3 other European cohorts. For example, two studies of Taiwanese (n = 6,638) and  
4  
5 Japanese (n = 3,141) cohorts reported rates of familial myasthenia gravis at 0.2% and  
6  
7 0.7%, respectively.<sup>12-13</sup> Three studies of Spanish, American, and Finnish cohorts  
8  
9 reported rates of 3.5%, 3.8%, and 7.2% (table 2).<sup>14-16</sup> The familial rates reported in our  
10  
11 cohort of over 1,000 patients were, as expected, closer in value to the rates reported  
12  
13 among European and American cohorts. Overall, these data suggest that there is  
14  
15 population variation in the inheritance of myasthenia gravis that warrants further study  
16  
17 to identify the genetic contribution to disease risk.  
18  
19

20  
21 A notable feature of our cohort is that males had a slightly higher prevalence of  
22  
23 familial myasthenia gravis compared to the females (1:1.32), suggesting that there  
24  
25 might be sex-specific differences in the occurrence of familial versus sporadic disease.  
26  
27 This observation may reflect the different age distribution of myasthenia gravis cases in  
28  
29 males versus females observed across all myasthenia gravis cases. The reason for this  
30  
31 is unclear, though we note that our previous genome-wide association study of  
32  
33 myasthenia gravis indicated that the genetic architecture was different among younger  
34  
35 and older age groups.<sup>10</sup>  
36  
37  
38  
39

40 Myasthenia gravis is an immunological disorder and, generally speaking,  
41  
42 autoimmune diseases are known to have heritable components.<sup>19</sup> Likewise,  
43  
44 approximately one-third of our cohort had a personal history and/or a family history of  
45  
46 another autoimmune disease, which is much higher than the prevalence of 3-9%, which  
47  
48 has been historically reported in the general population.<sup>17</sup> We found that 19% (11/58) of  
49  
50 the familial myasthenia gravis cases also had a personal history of autoimmune  
51  
52 diseases; this was more than the sporadic myasthenia gravis cases in which only 10%  
53  
54  
55  
56  
57  
58  
59  
60

1  
2  
3 (98/974) had a personal history of autoimmune diseases. Similar to previous reports, we  
4  
5 found thyroid disease, rheumatoid arthritis, systemic lupus erythematosus, and type 1  
6  
7 diabetes to be the most commonly identified comorbidities (figure 2C).<sup>18, 19</sup> Interestingly,  
8  
9 the frequency of thyroid disease in this cohort (11.4%) is similar to the frequency range  
10  
11 of thyroid disease reported in a study by Kiessling et al.<sup>20</sup> The increased prevalence of  
12  
13 familial myasthenia gravis and increased prevalence of other autoimmune disorders  
14  
15 both suggest that these autoimmune diseases may share a common predisposition that  
16  
17 may be genetic in origin. Future studies focusing on specific genes and genomic  
18  
19 variants encountered in patients with familial myasthenia gravis offer the promise to  
20  
21 more precisely identify any genetic contributions to the disease.  
22  
23  
24  
25

26 While our study has some notable strengths, it also has an inherent limitation  
27  
28 related to its reliance on self-reported family histories, which could have over- or  
29  
30 underestimated the prevalence of the diseases studied. For example, it is plausible that  
31  
32 a patient could self-report as not having a family history of myasthenia gravis because  
33  
34 the family member was never clinically diagnosed with the disease or did not live long  
35  
36 enough for the disease to manifest. Similarly, other studies have found an  
37  
38 overestimation of some autoimmune diseases, especially thyroid disease and  
39  
40 rheumatoid arthritis, related to self-reporting.<sup>21</sup>  
41  
42  
43  
44

45 Our analyses provide evidence of a genetic contribution to myasthenia gravis  
46  
47 based on the higher than expected rate of familial disease observed among our North  
48  
49 American patient cohort, as well as the co-occurrence of autoimmune diseases known  
50  
51 to have a genetic basis among this population. More work needs to be done to further  
52  
53 elucidate the genetic etiology of this archetypal autoimmune disease.  
54  
55  
56  
57  
58  
59  
60



## ACKNOWLEDGEMENTS

This work was supported in part by the Intramural Research Programs of the National Institutes of Health National Institute on Aging (Z01-AG000949-02). The work was also supported by the Myasthenia Gravis Foundation (Drs Drachman and Traynor), a generous bequest by Geraldine Weinrib, and a gift from Philip Swift. Support was provided by Mr. and Mrs. Don Brandon and the Department of Neurology, University of Kansas Medical Center. The funders had no role in the design and conduct of the study; collection, management, analysis, and interpretation of the data; preparation, review, or approval of the manuscript; and decision to submit the manuscript for publication. We thank the patients and research participants who contributed samples for this study.

## Competing interests

Mr. Green none declared.

Dr. Barohn served as a consultant for NuFactor and Momenta Pharmaceutical and receives research support from PTC Therapeutics, Ra Pharma, Orphazyme, Sanofi Genzyme, FDA OOPD, NIH, and PCORI.

Dr. Bartoccion none declared.

Dr. Benetar reports grant support from Muscular Dystrophy Association, ALS Association, ALS Recovery Fund, Kimmelman Estate, Target ALS, Eli Lilly & Company, and the National Institutes of Health (NIH) during the conduct of the study. He also

1  
2  
3 reports grant support from FDA, CDC, and DOD; research support from Alexion  
4  
5 Pharmaceuticals, UCB, Cytokinetics, Neuraltus, Biogen and Orphazyme A/S; and  
6  
7 personal fees from NMD Pharma, Ra Pharmaceuticals, Mitsubishi-Tanabe, Avexis,  
8  
9 UCB and Denali outside the submitted work.  
10

11  
12 Mr. Blackmore none declared  
13

14  
15 Dr. Chaudhry served as a consultant for review and expert testimony for the  
16  
17 Department of Health and Human Services and the Department of Justice under the  
18  
19 Vaccine Injury and Compensation Program. Dr. Chaudhry has received royalty for total  
20  
21 neuropathy score (TNS) patented (through Johns Hopkins University) for license of TNS  
22  
23 use from AstraZeneca, Genentech, Seattle Genetics, Calithera Biosciences, Inc,  
24  
25 Merrimack Pharmaceuticals, Inc., Levicept, and Acetylon Pharmaceuticals, Inc.  
26  
27

28  
29 Dr. Chopra none declared.  
30

31  
32 Dr. Corse none declared.  
33

34  
35 Dr. Dimachkie serves or recently served as a consultant for ArgenX, Catalyst, CSL-  
36  
37 Behring, Kezar, Momenta, NuFactor, RMS Medical, Sanofi Genzyme, Shire Takeda,  
38  
39 and Spark Therapeutics. Dr. Dimachkie received grants from Alexion, Alnylam  
40  
41 Pharmaceuticals, Amicus, Biomarin, Bristol-Myers Squibb, Catalyst, CSL-Behring,  
42  
43 FDA/OOPD, GlaxoSmithKline, Genentech, Grifols, Mitsubishi Tanabe Pharma, MDA,  
44  
45 NIH, Novartis, Sanofi Genzyme, Octapharma, Orphazyme, Sarepta Therapeutics, Shire  
46  
47 Takeda, Spark, UCB Biopharma, Viomed & TMA.  
48

49  
50 Dr. Evoli was a member of the advisory board for Alexion, a scientific award jury  
51  
52 member for Grifols and safety data monitor for UCB.  
53

54  
55 Dr. Florence none declared.  
56  
57  
58  
59  
60

1  
2  
3 Dr. Freimer has received honoraria for serving on advisory boards for ARGNX pharma,  
4 Alexion. Dr. Freimer also has research support from Catalyyst, Ra pharma, Amicus,  
5 Orphazyme, Alexion, Momenta and Alnylum.  
6  
7

8  
9  
10 Dr. Howard reports research support and grants from Alexion Pharmaceuticals, argenx  
11 BVBA, Centers for Disease Control and Prevention, Muscular Dystrophy Association,  
12 NIH (including the National Institute of Neurologic Disorders and Stroke and the  
13 National Institute of Arthritis and Musculoskeletal and Skin Disease), PCORI (Patient-  
14 Centered Outcomes Research Institute), and Ra Pharmaceuticals; and nonfinancial  
15 support from Alexion Pharmaceuticals, argenx BVBA, Ra Pharmaceuticals, and  
16 Toleranzia.  
17  
18

19 Dr. Jiwa none declared.  
20

21 Dr. Kaminski is funded by the Muscular Dystrophy Association (508240) and by NIH  
22 grant U54NS115054; is a consultant for Alnylam Pharmaceuticals, Ra Pharmaceuticals,  
23 and UCB Pharmaceuticals; and is CEO of ARC Biotechnology, LLC, which receives  
24 support from the NIH (R41NS110331). He serves on the Editorial Board of Experimental  
25 Neurology.  
26  
27

28 Dr. Kissel none declared.  
29

30 Ms. Koopman none declared.  
31

32 Ms. Lipscomb none declared.  
33

34 Dr. Maestri none declared.  
35

36 Dr. Marino none declared.  
37

38 Dr. Massey none declared  
39

40 Dr. McVey none declared.  
41  
42  
43  
44  
45  
46  
47  
48  
49  
50  
51  
52  
53  
54  
55  
56  
57  
58  
59  
60

1  
2  
3 Dr. Mezei has received honoraria as a speaker and/or moderator from Alnylam, Akcea,  
4  
5 Pfizer and CSL Behring. She has served on Advisory Boards for Pfizer, Alnylam and  
6  
7 Akcea. She serves as an investigator for clinical trials with Alnylam and Biogen.  
8  
9

10 Dr. Muppidi has served on advisory board meetings for Alexion and argenx.  
11

12 Dr. Nicolle none declared.  
13

14 Dr. Oger none declared.  
15

16 Dr. Pascuzzi none declared.  
17

18  
19 Dr. Pasnoor served on advisory board for CSL Behring, Alexion pharmaceuticals,  
20  
21 Argenx Pharmaceuticals and has been consultant for Momenta Pharmaceuticals.  
22  
23

24 Dr. Pestronk none declared.  
25

26 Dr. Provenzano none declared.  
27

28 Dr. Ricciardi none declared.  
29

30  
31 Dr. Richman receives research funding from a Sponsored Research Agreement from  
32  
33 Cabaletta Bioscience.  
34

35 Dr. Rowin none declared.  
36

37 Dr. Sanders none declared.  
38

39 Dr. Siddiqi none declared.  
40

41 Ms. Soloway none declared  
42  
43

44 Dr. Wolfe none declared.  
45

46 Dr. Wulf none declared.  
47

48 Dr. Drachman none declared.  
49

50  
51 Dr. Traynor holds an American and European Union patent on the clinical testing and  
52  
53 therapeutic intervention for the hexanucleotide repeat expansion of C9orf72. Has  
54  
55

1  
2  
3 received research grants from The Myasthenia Gravis Foundation, the Robert Packard  
4 Center for ALS Research, the ALS Association (ALSA), the Italian Football Federation  
5 (FIGC), the Center for Disease Control and Prevention (CDC), the Muscular Dystrophy  
6 Association (MDA), Merck Inc., and Microsoft Research. Dr. Traynor receives funding  
7 through the Intramural Research Program at the National Institutes of Health.  
8  
9

### 14 **Funding**

15  
16 Study funding by the National Institutes of Health Intramural Research Program. The  
17 work was also supported by the Myasthenia Gravis Foundation (Drs Drachman and  
18 Traynor), a generous bequest by Geraldine Weinrib, and a gift from Philip Swift. Support  
19 was provided by Mr. and Mrs. Don Brandon and the Department of Neurology,  
20 University of Kansas Medical Center.  
21  
22  
23  
24  
25  
26  
27  
28  
29  
30

### 31 **References**

- 32  
33  
34 1. Fambrough DM, Drachman DB, Satyamurti S. Neuromuscular  
35 junction in myasthenia gravis: decreased acetylcholine receptors. *Science* 1973;  
36 182:293-295.  
37  
38  
39  
40 2. Hoch W, McConville J, Helms S, Newsom-Davis J, Melms A, Vincent A. Auto-  
41 antibodies to the receptor tyrosine kinase MuSK in patients with myasthenia gravis  
42 without acetylcholine receptor antibodies. *Nat Med* 2001;7:365-368.  
43  
44  
45  
46 3. Gasperi C, Melms A, Schoser B, et al. Anti-agrin autoantibodies in myasthenia  
47 gravis. *Neurology* 2014;82:1976-1983.  
48  
49  
50  
51  
52  
53  
54  
55  
56  
57  
58  
59  
60

- 1  
2  
3 4. Higuchi O, Hamuro J, Motomura M, Yamanashi Y. Autoantibodies to low-density  
4 lipoprotein receptor-related protein 4 in myasthenia gravis. *Ann Neurol* 2011;69:418-  
5  
6 422.  
7
- 8  
9  
10 5. Jayam Trough A, Dabi A, Solieman N, Kurukumbi M, Kalyanam J. Myasthenia  
11  
12 gravis: a review. *Autoimmune Dis* 2012;2012:874680.  
13
- 14 6. McGrogan A, Sneddon S, de Vries CS. The incidence of myasthenia gravis: a  
15  
16 systematic literature review. *Neuroepidemiology* 2010;34:171-183.  
17
- 18 7. Yu YL, Hawkins BR, Ip MS, Wong V, Woo E. Myasthenia gravis in Hong Kong  
19  
20 Chinese. 1. Epidemiology and adult disease. *Acta Neurol Scand* 1992;86:113-119.  
21
- 22 8. MacDonald BK, Cockerell OC, Sander JW, Shorvon SD. The incidence and  
23  
24 lifetime prevalence of neurological disorders in a prospective community-based study in  
25  
26 the UK. *Brain* 2000;123 ( Pt 4):665-676.  
27
- 28 9. Spillane J, Higham E, Kullmann DM. Myasthenia gravis. *BMJ* 2012;345:e8497.  
29
- 30 10. Renton AE, Pliner HA, Provenzano C, et al. A genome-wide association study of  
31  
32 myasthenia gravis. *JAMA Neurol* 2015;72:396-404.  
33
- 34 11. Giraud M, Vandiedonck C, Garchon HJ. Genetic factors in autoimmune  
35  
36 myasthenia gravis. *Ann N Y Acad Sci* 2008;1132:180-192.  
37
- 38 12. Liu FC, Kuo CF, See LC, Tsai HI, Yu HP. Familial aggregation of myasthenia  
39  
40 gravis in affected families: a population-based study. *Clin Epidemiol* 2017;9:527-535.  
41
- 42 13. Murai H, Yamashita N, Watanabe M, et al. Characteristics of myasthenia gravis  
43  
44 according to onset-age: Japanese nationwide survey. *J Neurol Sci* 2011;305:97-102.  
45
- 46 14. Salvado M, Canela M, Ponseti JM, et al. Study of the prevalence of familial  
47  
48 autoimmune myasthenia gravis in a Spanish cohort. *J Neurol Sci* 2016;360:110-114.  
49  
50  
51  
52  
53  
54  
55  
56  
57  
58  
59  
60

- 1  
2  
3 15. Pirskanen R. Genetic aspects in myasthenia gravis. A family study of 264 Finnish  
4 patients. *Acta Neurol Scand* 1977;56:365-388.  
5  
6
- 7 16. Namba T, Brunner NG, Brown SB, Murguruma M, Grob D. Familial myasthenia  
8 gravis. Report of 27 patients in 12 families and review of 164 patients in 73 families.  
9  
10 *Arch Neurol* 1971;25:49-60.  
11  
12
- 13 17. Cooper GS, Bynum ML, Somers EC. Recent insights in the epidemiology of  
14 autoimmune diseases: improved prevalence estimates and understanding of clustering  
15 of diseases. *J Autoimmun* 2009;33:197-207.  
16  
17
- 18 18. Mao ZF, Yang LX, Mo XA, et al. Frequency of autoimmune diseases in  
19 myasthenia gravis: a systematic review. *Int J Neurosci* 2011;121:121-129.  
20  
21
- 22 19. Ceccarelli F, Agmon-Levin N, Perricone C. Genetic Factors of Autoimmune  
23 Diseases. *J Immunol Res* 2016;2016:1-2.  
24  
25
- 26 20. Kiessling WR, Finke R, Kotulla P, Schleusener H. Circulating TSH-binding  
27 inhibiting immunoglobulins in myasthenia gravis. *Acta Endocrinol (Copenh)*  
28  
29 1982;101:41-46.  
30  
31
- 32 21. O'Rourke JA, Ravichandran C, Howe YJ, Mullett JE, Keary CJ, Golas SB,  
33 Hureau AR, McCormick M, Chung J, Rose NR, McDougale CJ. Accuracy of self-reported  
34 history of autoimmune disease: A pilot study. *PLoS ONE* 2019;14(5): e0216526  
35  
36  
37  
38  
39  
40  
41  
42  
43  
44  
45  
46  
47  
48  
49  
50  
51  
52  
53  
54  
55  
56  
57  
58  
59  
60

## Figures

### Figure 1.

Symptom-onset age distribution of sporadic and familial cases. The density represents the relative probability of myasthenia gravis at each age point.

### Figure 2.

Autoimmune diseases in a cohort of 1,032 patients with myasthenia gravis. (A) Occurrence of autoimmune diseases among patients with myasthenia (n = 275). (B) Occurrence of autoimmune diseases among familial relatives of patients with myasthenia gravis (n = 293). (C) Comparisons of autoimmune diseases among patients with myasthenia gravis and among relatives. Size of circles represent the percentage previously reported by Mao et al.<sup>18</sup>



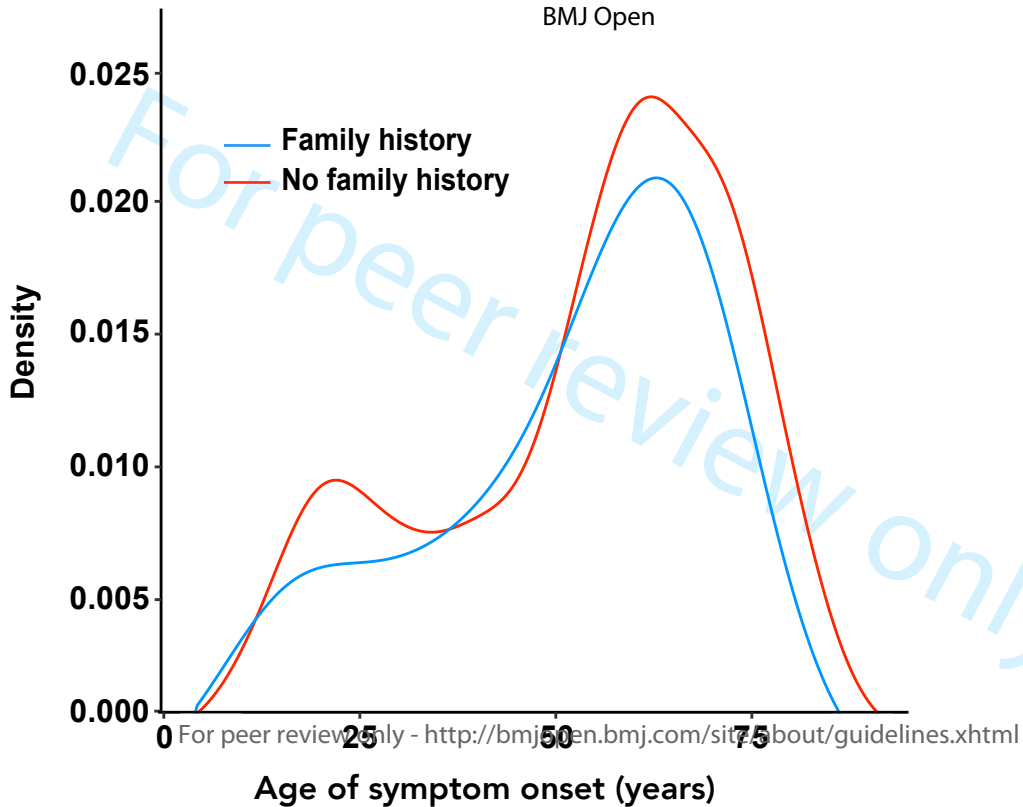

1  
2  
3  
4  
5  
6  
7  
8  
9  
10  
11  
12  
13  
14  
15  
16  
17  
18  
19  
20  
21  
22  
23

### A. Personal history of autoimmune diseases

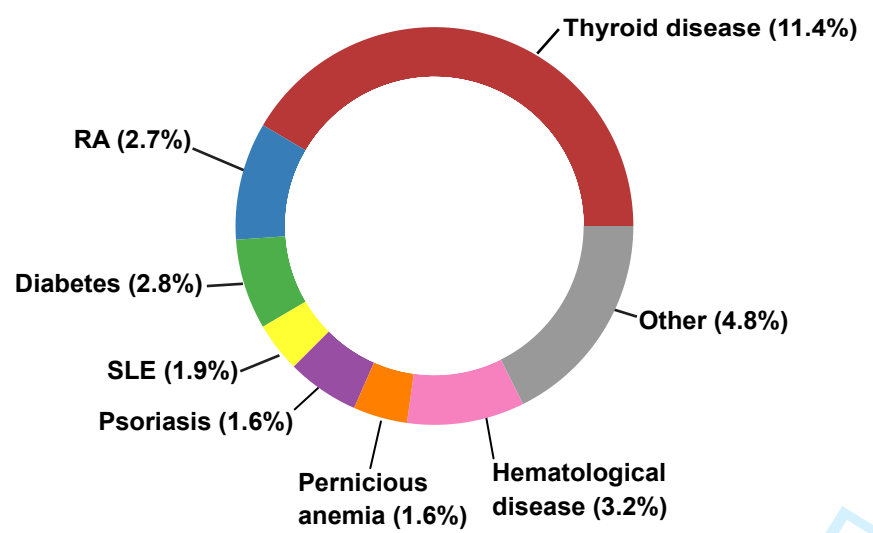

### B. Family history of autoimmune diseases

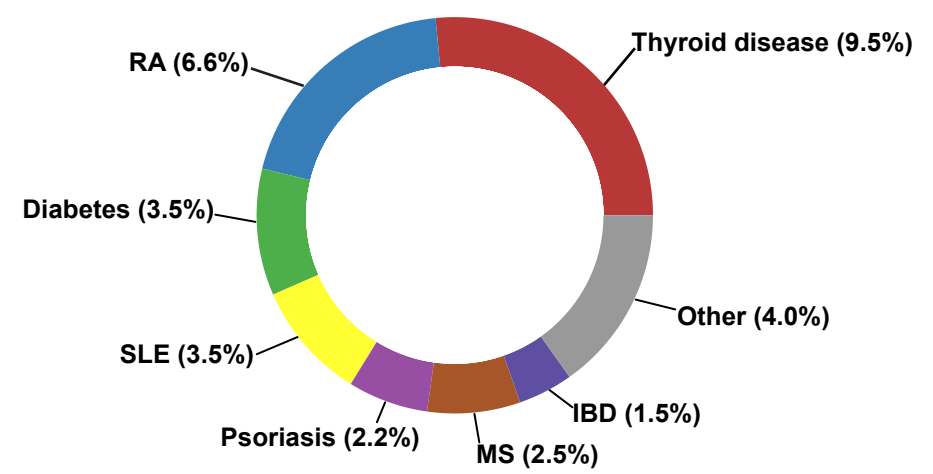

### C. Relationships between personal and family histories of autoimmune diseases

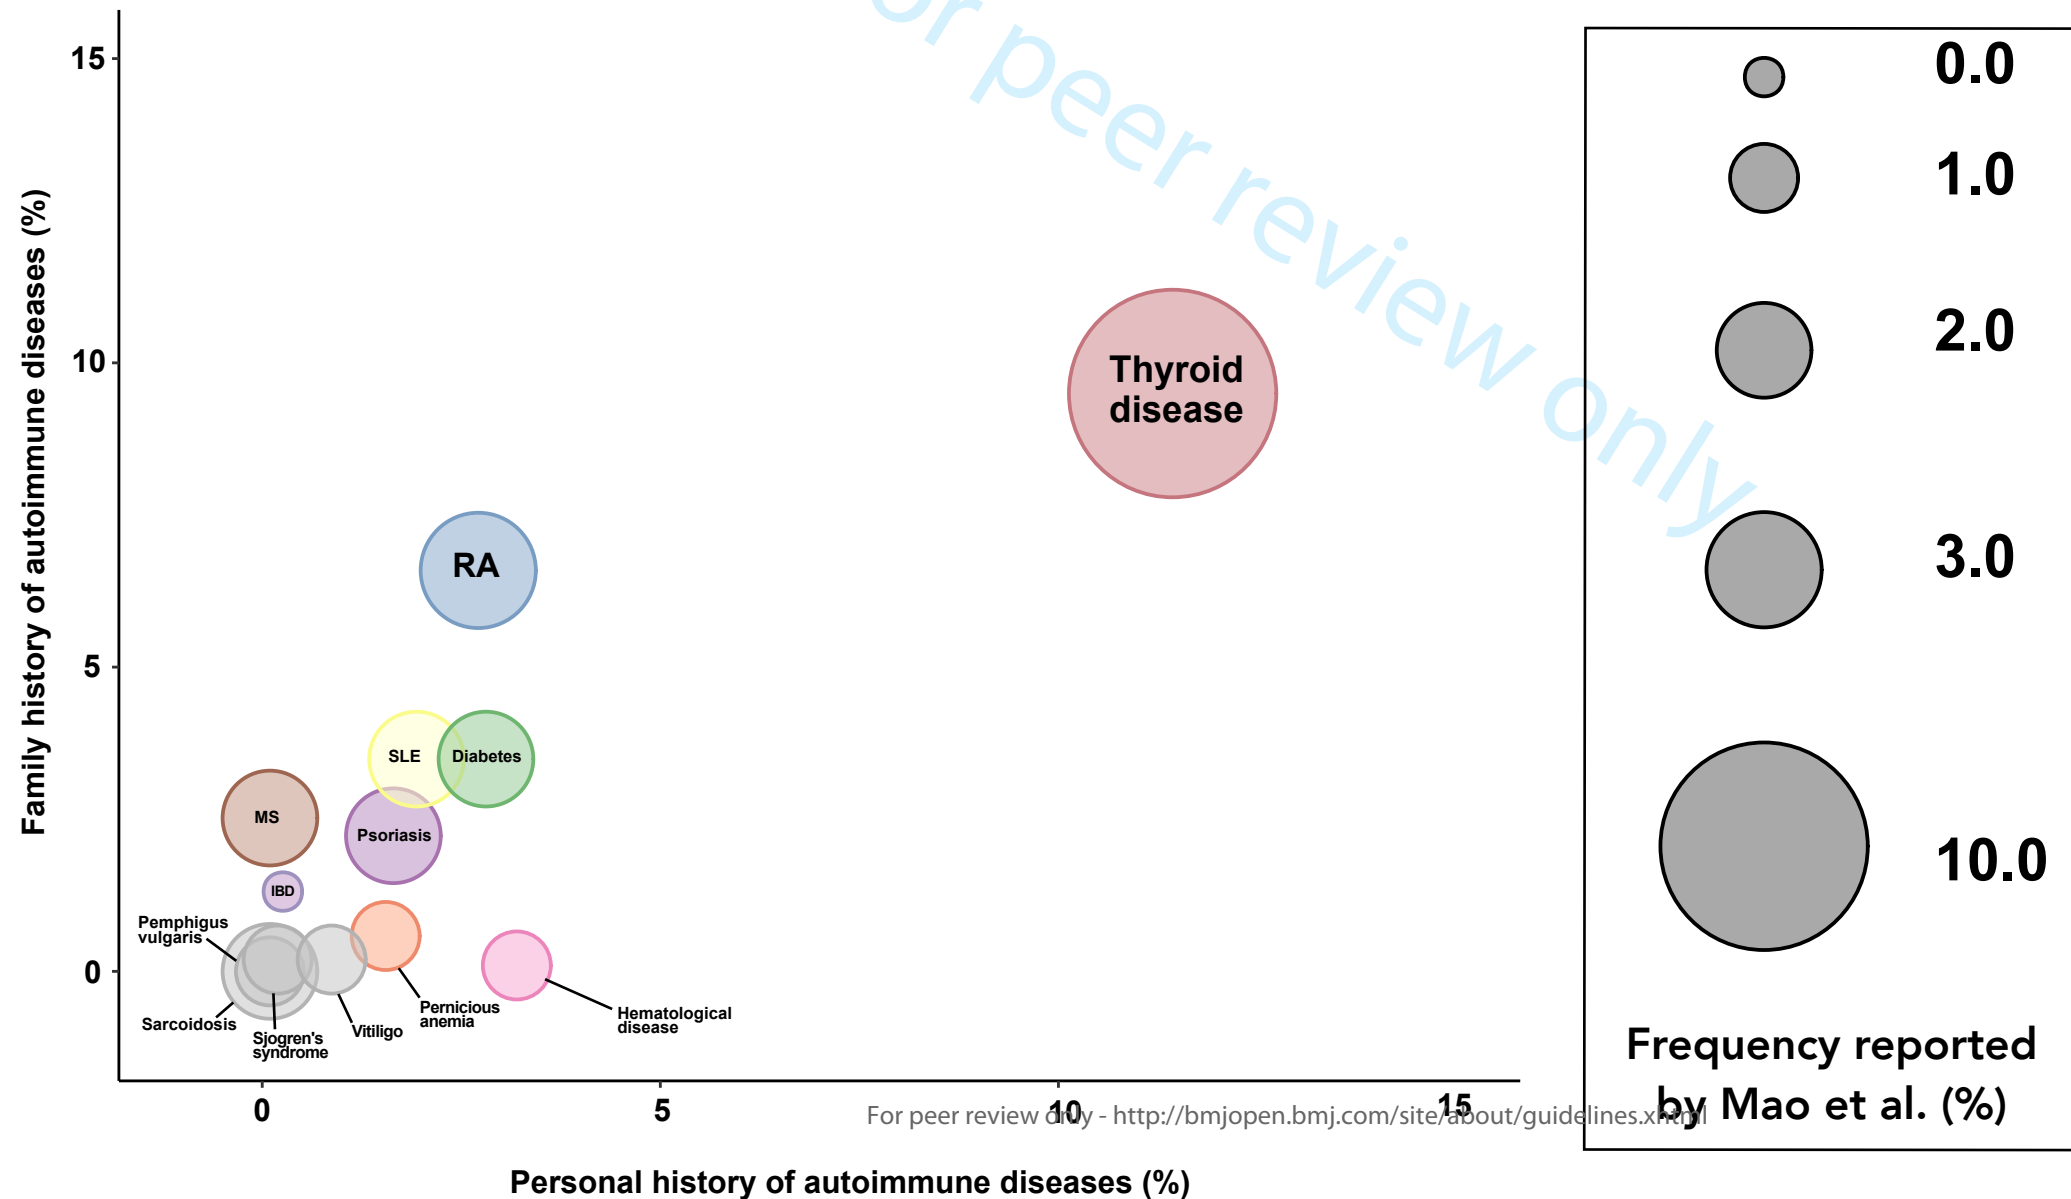

**Table S1.** Questionnaire used to collect demographic and clinical information from patients diagnosed with myasthenia gravis

| Patient Information                  |                                   |
|--------------------------------------|-----------------------------------|
| Patient identification number:       | String (e.g., JHU1, JHU2)         |
| Institution:                         | String (e.g., Johns Hopkins, UWO) |
| Date:                                | Date                              |
| Verified as Caucasian?               | Yes/No                            |
| AChR titer - Initial or 1st known:   | Numeric                           |
| Age at symptom onset (years):        | Numeric                           |
| Gender:                              | Male/Female                       |
| Worst status                         |                                   |
| Diplopia or ptosis only?             | Yes/No                            |
| Mild limb weakness?                  | Yes/No                            |
| Dysphagia dyspnea?                   | Yes/No                            |
| Severe limb weakness?                | Yes/No                            |
| Hospitalized?                        | Yes/No                            |
| Ventilated?                          | Yes/No                            |
| Feeding tube?                        | Yes/No                            |
| Treatment                            |                                   |
| Mestinon?                            | Yes/No                            |
| Benefit: Mestinon:                   | Ordinal scale [0,1,2]             |
| Prednisone?                          | Yes/No                            |
| Benefit: Prednisone:                 | Ordinal scale [0,1,2]             |
| CellCept?                            | Yes/No                            |
| Benefit: CellCept?                   | Ordinal scale [0,1,2]             |
| Cyclosporine?                        | Yes/No                            |
| Benefit: Cyclosporine:               | Ordinal scale [0,1,2]             |
| Tacrolimus?                          | Yes/No                            |
| Benefit: Tacrolimus:                 | Ordinal scale [0,1,2]             |
| Intravenous immunoglobulin?          | Yes/No                            |
| Benefit: Intravenous immunoglobulin: | Ordinal scale [0,1,2]             |
| Plasmapheresis?                      | Yes/No                            |
| Benefit: Plasmapheresis:             | Ordinal scale [0,1,2]             |
| Imuran/Azathioprine?                 | Yes/No                            |
| Benefit: Imuran/Azathioprine:        | Ordinal scale [0,1,2]             |
| Other treatment?                     | Yes/No                            |
| Name of other 1:                     | String (e.g., Mytelase)           |
| Benefit: other 1:                    | Ordinal scale [0,1,2]             |
| Name of other 2:                     | String (e.g., Mytelase)           |
| Benefit: other 2:                    | Ordinal scale [0,1,2]             |

| <b>Best Status</b>                                     |                                         |
|--------------------------------------------------------|-----------------------------------------|
| Back to normal without medication?                     | Yes/No                                  |
| Back to normal with medication?                        | Yes/No                                  |
| Diplopia or ptosis only?                               | Yes/No                                  |
| Mild limb weakness?                                    | Yes/No                                  |
| Dysphagia/dyspnea?                                     | Yes/No                                  |
| Severe limb weakness?                                  | Yes/No                                  |
| Hospitalized?                                          | Yes/No                                  |
| Ventilated?                                            | Yes/No                                  |
| Feeding tube:                                          | Yes/No                                  |
| <b>Other Autoimmune Diseases</b>                       |                                         |
| Other autoimmune disease?                              | Yes/No                                  |
| Thyroiditis?                                           | Yes/No                                  |
| Lupus?                                                 | Yes/No                                  |
| Rheumatoid arthritis?                                  | Yes/No                                  |
| Psoriasis?                                             | Yes/No                                  |
| Blood disease?                                         | Yes/No                                  |
| Other Autoimmune Disease?                              | Yes/No                                  |
| Other Autoimmune Disease (Name1):                      | String (e.g., vitiligo, celiac disease) |
| Other Autoimmune Disease (Name2):                      | String (e.g., vitiligo, celiac disease) |
| Other Autoimmune Disease (Name3):                      | String (e.g., vitiligo, celiac disease) |
| <b>Family history of myasthenia gravis</b>             |                                         |
| Family history of myasthenia gravis?                   | Yes/No                                  |
| Myasthenia gravis (Relationship):                      | String (e.g., mother, sister)           |
| <b>Family history of other Autoimmune Disease</b>      |                                         |
| Family history of other Autoimmune Disease?            | Yes/No                                  |
| Autoimmune Disease (Relationship):                     | String (e.g., mother, sister)           |
| Autoimmune Disease (Disease):                          | String (e.g., polymyalgia, vitiligo)    |
| Family history of other Autoimmune Disease 2nd Member? | Yes/No                                  |
| Autoimmune Disease (Relationship) 2nd Member:          | String (e.g., mother, sister)           |
| Autoimmune Disease (Disease) 2nd Member:               | String (e.g., polymyalgia, vitiligo)    |
| Family history of other Autoimmune Disease 3rd Member? | Yes/No                                  |
| Autoimmune Disease (Relationship) 3rd Member:          | String (e.g., mother, sister)           |
| Autoimmune Disease (Disease) 3rd Member:               | String (e.g., polymyalgia, vitiligo)    |
| Other relative in study?                               | Yes/No                                  |
| Other relative in study id                             | String (e.g., JHU1, JHU2)               |
| Thymectomy?                                            | Yes/No                                  |
| Thymoma?                                               | Yes/No                                  |
| Histology of thymus if known?                          | String (e.g., Follicular Hyperplasia)   |

**STROBE 2007 (v4) Statement—Checklist of items that should be included in reports of cohort studies**

| Section/Topic                | Item # | Recommendation                                                                                                                                                                       | Reported on page # |
|------------------------------|--------|--------------------------------------------------------------------------------------------------------------------------------------------------------------------------------------|--------------------|
| <b>Title and abstract</b>    | 1      | (a) Indicate the study's design with a commonly used term in the title or the abstract                                                                                               | 1                  |
|                              |        | (b) Provide in the abstract an informative and balanced summary of what was done and what was found                                                                                  | 7-8                |
| <b>Introduction</b>          |        |                                                                                                                                                                                      | <b>10-11</b>       |
| Background/rationale         | 2      | Explain the scientific background and rationale for the investigation being reported                                                                                                 | 10-11              |
| Objectives                   | 3      | State specific objectives, including any prespecified hypotheses                                                                                                                     | 11                 |
| <b>Methods</b>               |        |                                                                                                                                                                                      | <b>11-13</b>       |
| Study design                 | 4      | Present key elements of study design early in the paper                                                                                                                              | 11                 |
| Setting                      | 5      | Describe the setting, locations, and relevant dates, including periods of recruitment, exposure, follow-up, and data collection                                                      | 11-13              |
| Participants                 | 6      | (a) Give the eligibility criteria, and the sources and methods of selection of participants. Describe methods of follow-up                                                           | 11                 |
|                              |        | (b) For matched studies, give matching criteria and number of exposed and unexposed                                                                                                  | NA                 |
| Variables                    | 7      | Clearly define all outcomes, exposures, predictors, potential confounders, and effect modifiers. Give diagnostic criteria, if applicable                                             | 11-13              |
| Data sources/<br>measurement | 8*     | For each variable of interest, give sources of data and details of methods of assessment (measurement). Describe comparability of assessment methods if there is more than one group | 11-13              |
| Bias                         | 9      | Describe any efforts to address potential sources of bias                                                                                                                            | 11-13              |
| Study size                   | 10     | Explain how the study size was arrived at                                                                                                                                            | 11-13              |
| Quantitative variables       | 11     | Explain how quantitative variables were handled in the analyses. If applicable, describe which groupings were chosen and why                                                         | 11-13              |
| Statistical methods          | 12     | (a) Describe all statistical methods, including those used to control for confounding                                                                                                | 14-15              |
|                              |        | (b) Describe any methods used to examine subgroups and interactions                                                                                                                  | 14-15              |
|                              |        | (c) Explain how missing data were addressed                                                                                                                                          | 14-15              |
|                              |        | (d) If applicable, explain how loss to follow-up was addressed                                                                                                                       | 14-15              |
|                              |        | (e) Describe any sensitivity analyses                                                                                                                                                | NA                 |
| <b>Results</b>               |        |                                                                                                                                                                                      | <b>13-15</b>       |

|                          |     |                                                                                                                                                                                                              |         |
|--------------------------|-----|--------------------------------------------------------------------------------------------------------------------------------------------------------------------------------------------------------------|---------|
| Participants             | 13* | (a) Report numbers of individuals at each stage of study—eg numbers potentially eligible, examined for eligibility, confirmed eligible, included in the study, completing follow-up, and analysed            | 7,11,14 |
|                          |     | (b) Give reasons for non-participation at each stage                                                                                                                                                         | NA      |
|                          |     | (c) Consider use of a flow diagram                                                                                                                                                                           | NA      |
| Descriptive data         | 14* | (a) Give characteristics of study participants (eg demographic, clinical, social) and information on exposures and potential confounders                                                                     | 13      |
|                          |     | (b) Indicate number of participants with missing data for each variable of interest                                                                                                                          | NA      |
|                          |     | (c) Summarise follow-up time (eg, average and total amount)                                                                                                                                                  | NA      |
| Outcome data             | 15* | Report numbers of outcome events or summary measures over time                                                                                                                                               | 13-15   |
| Main results             | 16  | (a) Give unadjusted estimates and, if applicable, confounder-adjusted estimates and their precision (eg, 95% confidence interval). Make clear which confounders were adjusted for and why they were included | 13-15   |
|                          |     | (b) Report category boundaries when continuous variables were categorized                                                                                                                                    | 13-15   |
|                          |     | (c) If relevant, consider translating estimates of relative risk into absolute risk for a meaningful time period                                                                                             | NA      |
| Other analyses           | 17  | Report other analyses done—eg analyses of subgroups and interactions, and sensitivity analyses                                                                                                               | 13-15   |
| <b>Discussion</b>        |     |                                                                                                                                                                                                              | 16-18   |
| Key results              | 18  | Summarise key results with reference to study objectives                                                                                                                                                     | 16-18   |
| <b>Limitations</b>       |     |                                                                                                                                                                                                              | 17-18   |
| Interpretation           | 20  | Give a cautious overall interpretation of results considering objectives, limitations, multiplicity of analyses, results from similar studies, and other relevant evidence                                   | 17-18   |
| Generalisability         | 21  | Discuss the generalisability (external validity) of the study results                                                                                                                                        | 17-18   |
| <b>Other information</b> |     |                                                                                                                                                                                                              | NA      |
| Funding                  | 22  | Give the source of funding and the role of the funders for the present study and, if applicable, for the original study on which the present article is based                                                | 23      |

\*Give information separately for cases and controls in case-control studies and, if applicable, for exposed and unexposed groups in cohort and cross-sectional studies.

**Note:** An Explanation and Elaboration article discusses each checklist item and gives methodological background and published examples of transparent reporting. The STROBE checklist is best used in conjunction with this article (freely available on the Web sites of PLoS Medicine at <http://www.plosmedicine.org/>, Annals of Internal Medicine at <http://www.annals.org/>, and Epidemiology at <http://www.epidem.com/>). Information on the STROBE Initiative is available at [www.strobe-statement.org](http://www.strobe-statement.org).

# BMJ Open

## Epidemiological evidence for a hereditary contribution to myasthenia gravis: a retrospective cohort study of patients from North America

|                               |                                                                                                                                                                                                                                                                                                                                                                                                                                                                                                                                                                                                                                                                                                                                                                                                                                                                                                                                                                                                                                                                                                                                                                                                                                                                                                                                                                                                                                                                                                                                                                                                                                                                                                                                                                                                                                                                                                                                                                                                                                            |
|-------------------------------|--------------------------------------------------------------------------------------------------------------------------------------------------------------------------------------------------------------------------------------------------------------------------------------------------------------------------------------------------------------------------------------------------------------------------------------------------------------------------------------------------------------------------------------------------------------------------------------------------------------------------------------------------------------------------------------------------------------------------------------------------------------------------------------------------------------------------------------------------------------------------------------------------------------------------------------------------------------------------------------------------------------------------------------------------------------------------------------------------------------------------------------------------------------------------------------------------------------------------------------------------------------------------------------------------------------------------------------------------------------------------------------------------------------------------------------------------------------------------------------------------------------------------------------------------------------------------------------------------------------------------------------------------------------------------------------------------------------------------------------------------------------------------------------------------------------------------------------------------------------------------------------------------------------------------------------------------------------------------------------------------------------------------------------------|
| Journal:                      | <i>BMJ Open</i>                                                                                                                                                                                                                                                                                                                                                                                                                                                                                                                                                                                                                                                                                                                                                                                                                                                                                                                                                                                                                                                                                                                                                                                                                                                                                                                                                                                                                                                                                                                                                                                                                                                                                                                                                                                                                                                                                                                                                                                                                            |
| Manuscript ID                 | bmjopen-2020-037909.R2                                                                                                                                                                                                                                                                                                                                                                                                                                                                                                                                                                                                                                                                                                                                                                                                                                                                                                                                                                                                                                                                                                                                                                                                                                                                                                                                                                                                                                                                                                                                                                                                                                                                                                                                                                                                                                                                                                                                                                                                                     |
| Article Type:                 | Original research                                                                                                                                                                                                                                                                                                                                                                                                                                                                                                                                                                                                                                                                                                                                                                                                                                                                                                                                                                                                                                                                                                                                                                                                                                                                                                                                                                                                                                                                                                                                                                                                                                                                                                                                                                                                                                                                                                                                                                                                                          |
| Date Submitted by the Author: | 08-Jul-2020                                                                                                                                                                                                                                                                                                                                                                                                                                                                                                                                                                                                                                                                                                                                                                                                                                                                                                                                                                                                                                                                                                                                                                                                                                                                                                                                                                                                                                                                                                                                                                                                                                                                                                                                                                                                                                                                                                                                                                                                                                |
| Complete List of Authors:     | <p>Green, Joshua; National Institute on Aging Intramural Research Program, Neuromuscular Diseases Research Unit, Laboratory of Neurogenetics</p> <p>Barohn, Richard; University of Kansas Medical Center, Department of Neurology</p> <p>Bartoccion, Emanuela; Catholic University, Fondazione Policlinico Universitario "A. Gemelli" - I.R.C.C.S, Institute of General Pathology</p> <p>Benetar, Michael; University of Miami, Department of Neurology</p> <p>Blackmore, Derrick; University of Alberta Hospital, Department of Medicine</p> <p>Chaudhry, Vinay; Johns Hopkins School of Medicine, Department of Neurology</p> <p>Chopra, Manisha ; University of North Carolina at Chapel Hill, Department of Neurology</p> <p>Corse, Andrea; Johns Hopkins School of Medicine, Department of Neurology</p> <p>Dimachkie, Mazen M.; University of Kansas Medical Center, Department of Neurology</p> <p>Evoli, Amelia ; Policlinico A. Gemelli IRCSS, Università Cattolica del S. Cuore, Istituto di Neurologia</p> <p>Florence , Julaine ; Washington University School of Medicine in Saint Louis, Department of Neurology</p> <p>Freimer , Miriam ; Ohio State University Medical Center, Department of Neurology</p> <p>Howard, James ; University of North Carolina at Chapel Hill, Department of Neurology</p> <p>Jiwa, Theresa; University of British Columbia, Division of Neurology</p> <p>Kaminski , Henry ; George Washington University</p> <p>Kissel, JT; Ohio State University Medical Center, Department of Neurology</p> <p>Koopman, Wilma; London Health Sciences Centre, Department of Clinical Neurosciences,</p> <p>Lipscomb, Bernadette ; Duke University Medical Center, Department of Neurology</p> <p>Maestri , Michelangelo ; University of Pisa, Department of Neuroscience</p> <p>Marino, Mariapaola ; Catholic University, Fondazione Policlinico Universitario "A. Gemelli" - I.R.C.C.S., Institute of General Pathology</p> <p>Massey, Janice; Duke University Medical Center, Department of Neurology</p> |

|                                 |                                                                                                                                                                                                                                                                                                                                                                                                                                                                                                                                                                                                                                                                                                                                                                                                                                                                                                                                                                                                                                                                                                                                                                                                                                                                                                                                                                                                                                                                                                                                                                                                                                                                                                                                                                                                           |
|---------------------------------|-----------------------------------------------------------------------------------------------------------------------------------------------------------------------------------------------------------------------------------------------------------------------------------------------------------------------------------------------------------------------------------------------------------------------------------------------------------------------------------------------------------------------------------------------------------------------------------------------------------------------------------------------------------------------------------------------------------------------------------------------------------------------------------------------------------------------------------------------------------------------------------------------------------------------------------------------------------------------------------------------------------------------------------------------------------------------------------------------------------------------------------------------------------------------------------------------------------------------------------------------------------------------------------------------------------------------------------------------------------------------------------------------------------------------------------------------------------------------------------------------------------------------------------------------------------------------------------------------------------------------------------------------------------------------------------------------------------------------------------------------------------------------------------------------------------|
|                                 | <p>McVey , April ; University of Kansas Medical Center, Department of Neurology</p> <p>Mezei , Michelle ; The University of British Columbia, Division of Neurology</p> <p>Muppidi , Srikanth ; Stanford University, Department of Neurology and Neurosciences</p> <p>Nicolle, Michael ; London Health Sciences Centre, Division of Neurology</p> <p>Oger, Joel; The University of British Columbia, Division of Neurology</p> <p>Pascuzzi , Robert ; Indiana University Purdue University at Indianapolis, Department of Neurology</p> <p>Pasnoor , Mamatha ; University of Kansas Medical Center, Department of Neurology</p> <p>Pestronk , Alan ; Washington University School of Medicine in Saint Louis, Department of Neurology</p> <p>Provenzano , Carlo ; Catholic University, Fondazione Policlinico Universitario "A. Gemelli" - I.R.C.C.S, Institute of General Pathology</p> <p>Ricciardi , Roberta ; University of Pisa, Department of Neuroscience</p> <p>Richman, DP; Center for Neuroscience, University of California, Neurology</p> <p>Rowin, Julie ; APAC Centers for Pain Management Wellness and Integrative Neurology</p> <p>Sanders, Donald ; Duke University Medical Center, Department of Neurology</p> <p>Siddiqi , Zaeem ; University of Alberta Hospital, Department of Medicine</p> <p>Soloway, Aimee ; University of Alberta Hospital, Department of Medicine</p> <p>Wolfe, Gil ; State University of New York at Buffalo, Department of Neurology</p> <p>Wulf, Charlie; Washington University School of Medicine in Saint Louis, Department of Neurology</p> <p>Drachman, Daniel ; Johns Hopkins School of Medicine</p> <p>Traynor, Bryan ; National Institute on Aging Intramural Research Program, Neuromuscular Diseases Research Unit, Laboratory of Neurogenetics</p> |
| <b>Primary Subject Heading</b>: | Epidemiology                                                                                                                                                                                                                                                                                                                                                                                                                                                                                                                                                                                                                                                                                                                                                                                                                                                                                                                                                                                                                                                                                                                                                                                                                                                                                                                                                                                                                                                                                                                                                                                                                                                                                                                                                                                              |
| Secondary Subject Heading:      | Neurology                                                                                                                                                                                                                                                                                                                                                                                                                                                                                                                                                                                                                                                                                                                                                                                                                                                                                                                                                                                                                                                                                                                                                                                                                                                                                                                                                                                                                                                                                                                                                                                                                                                                                                                                                                                                 |
| Keywords:                       | EPIDEMIOLOGY, Neuromuscular disease < NEUROLOGY, GENETICS, Neurology < INTERNAL MEDICINE, Neurogenetics < NEUROLOGY                                                                                                                                                                                                                                                                                                                                                                                                                                                                                                                                                                                                                                                                                                                                                                                                                                                                                                                                                                                                                                                                                                                                                                                                                                                                                                                                                                                                                                                                                                                                                                                                                                                                                       |
|                                 |                                                                                                                                                                                                                                                                                                                                                                                                                                                                                                                                                                                                                                                                                                                                                                                                                                                                                                                                                                                                                                                                                                                                                                                                                                                                                                                                                                                                                                                                                                                                                                                                                                                                                                                                                                                                           |

SCHOLARONE™  
Manuscripts





I, the Submitting Author has the right to grant and does grant on behalf of all authors of the Work (as defined in the below author licence), an exclusive licence and/or a non-exclusive licence for contributions from authors who are: i) UK Crown employees; ii) where BMJ has agreed a CC-BY licence shall apply, and/or iii) in accordance with the terms applicable for US Federal Government officers or employees acting as part of their official duties; on a worldwide, perpetual, irrevocable, royalty-free basis to BMJ Publishing Group Ltd ("BMJ") its licensees and where the relevant Journal is co-owned by BMJ to the co-owners of the Journal, to publish the Work in this journal and any other BMJ products and to exploit all rights, as set out in our [licence](#).

The Submitting Author accepts and understands that any supply made under these terms is made by BMJ to the Submitting Author unless you are acting as an employee on behalf of your employer or a postgraduate student of an affiliated institution which is paying any applicable article publishing charge ("APC") for Open Access articles. Where the Submitting Author wishes to make the Work available on an Open Access basis (and intends to pay the relevant APC), the terms of reuse of such Open Access shall be governed by a Creative Commons licence – details of these licences and which [Creative Commons](#) licence will apply to this Work are set out in our licence referred to above.

Other than as permitted in any relevant BMJ Author's Self Archiving Policies, I confirm this Work has not been accepted for publication elsewhere, is not being considered for publication elsewhere and does not duplicate material already published. I confirm all authors consent to publication of this Work and authorise the granting of this licence.

1  
2  
3 Epidemiological evidence for a hereditary contribution to myasthenia gravis: a  
4 retrospective cohort study of patients from North America  
5  
6  
7  
8  
9

10 Joshua D. Green, BS; Richard J. Barohn, MD; Emanuela Bartoccion, PhD; Michael  
11 Benetar, MD, PhD; Derrick Blackmore, BSc; Vinay Chaudhry, MD; Manisha Chopra,  
12 MD; Andrea Corse, MD; Mazen M. Dimachkie, MD; Amelia Evoli, MD; Julaine Florence,  
13 PT, MHS, DPT; Miriam Freimer, MD; James F. Howard Jr, MD; Theresa Jiwa; Henry J.  
14 Kaminski, MD; John Kissel, MD; Wilma J. Koopman, RN; Bernadette Lipscomb, RN;  
15 Michelangelo Maestri, MD; Mariapaola Marino, MD; Janice M. Massey, MD; April McVey,  
16 MD; Michelle M. Mezei, MD; Srikanth Muppidi, MD; Michael W. Nicolle, MD; Joel Oger,  
17 MD; Robert M. Pascuzzi; Mamatha Pasnoor, MD; Alan Pestronk, MD; Carlo  
18 Provenzano, MD, PhD; Roberta Ricciardi, MD; David P. Richman, MD; Julie Rowin,  
19 MD; Donald B. Sanders, MD; Zaeem Siddiqi, MD; Aimee Soloway, RN; Gil I. Wolfe, MD;  
20 Charlie Wulf, BS; Daniel B. Drachman, MD\*; and Bryan J. Traynor, MD, PhD\*  
21  
22  
23  
24  
25  
26  
27  
28  
29  
30  
31  
32  
33  
34

35 \* These authors contributed equally to the manuscript.  
36  
37  
38  
39

40 **Author Contributions:** The study concept and design were proposed by DBD and BJT.  
41 The acquisition, analysis, and/or interpretation of data provided done by all authors. The  
42 manuscript was drafted by JDG and BJT. Critical revisions, intellectual contributions,  
43 and final approval were provided by DBD, RJB, EB, MB, DB, VC, MC, AC, MD, AE, JF,  
44 MF, JH, TJ, HJK, JK, WJK, BL, MM, MM, JMM, AM, MM, SM, MN, JO, RMP, MP, AP,  
45 CP, RR, DR, JR, DBS, ZS, AS, GIW, and CW. The statistical analysis for this study was  
46 provided by JDG.  
47  
48  
49  
50  
51  
52  
53  
54  
55  
56  
57  
58  
59  
60

## Affiliations

Joshua D. Green, Neuromuscular Diseases Research Unit, Laboratory of Neurogenetics, National Institute on Aging, National Institutes of Health, Porter Neuroscience Research Center, Bethesda, Maryland

Richard J. Barohn, Department of Neurology, University of Kansas Medical Center, Kansas City

Emanuela Bartoccion, Institute of General Pathology, Catholic University, Fondazione Policlinico Universitario "A. Gemelli" - I.R.C.C.S, Rome, Italy.

Michael Benetar, Department of Neurology, University of Miami, Miami, Florida

Derrick Blackmore, Department of Medicine, University of Alberta Hospital, Edmonton, Alberta, Canada

Vinay Chaudhry, Department of Neurology, Johns Hopkins School of Medicine, Baltimore, Maryland

Manisha Chopra, Department of Neurology, University of North Carolina, Chapel Hill

Andrea Corse, Department of Neurology, Johns Hopkins School of Medicine, Baltimore, Maryland

Mazen M. Dimachkie, Department of Neurology, University of Kansas Medical Center, Kansas City, Kansas

Amelia Evoli, Istituto di Neurologia, Policlinico A. Gemelli IRCSS, Università Cattolica del S. Cuore, Roma, Italy

Julaine Florence, Department of Neurology, Washington University School of Medicine,

1  
2  
3 St Louis, Missouri

4  
5 Miriam Freimer, Department of Neurology, Ohio State University Medical Center,  
6  
7  
8 Columbus

9  
10 James F. Howard Jr, Department of Neurology, University of North Carolina, Chapel Hill

11  
12 Theresa Jiwa, Division of Neurology, University of British Columbia, Vancouver, British  
13  
14 Columbia, Canada

15  
16 Henry J. Kaminski, Department of Neurology, George Washington University,  
17  
18 Washington, DC

19  
20 John Kissel, Department of Neurology, Ohio State University Medical Center, Columbus

21  
22 Wilma J. Koopman, Department of Clinical Neurosciences, London Health Sciences  
23  
24 Centre, London, Ontario, Canada

25  
26 Bernadette Lipscomb, Department of Neurology, Duke University Medical Center,  
27  
28 Durham, North Carolina

29  
30 Michelangelo Maestri, Department of Neuroscience, Cisanello Hospital, University of  
31  
32 Pisa, Pisa, Italy

33  
34 Mariapaola Marino, Institute of General Pathology, Catholic University, Fondazione  
35  
36 Policlinico Universitario "A. Gemelli" - I.R.C.C.S, Rome, Italy.

37  
38 Janice M. Massey, Department of Neurology, Duke University Medical Center, Durham,  
39  
40 North Carolina

41  
42 April McVey, Department of Neurology, University of Kansas Medical Center, Kansas  
43  
44 City

45  
46 Michelle M. Mezei, Division of Neurology, University of British Columbia, Vancouver,  
47  
48 British Columbia, Canada

1  
2  
3 Srikanth Muppidi, Clinical Associate Professor, Dept of Neurology and Neurosciences.  
4  
5 Stanford University  
6

7 Michael W. Nicolle, Department of Clinical Neurosciences, London Health Sciences  
8  
9 Centre, London, Ontario, Canada  
10

11  
12 Joel Oger, Division of Neurology, University of British Columbia, Vancouver, British  
13  
14 Columbia, Canada  
15

16  
17 Robert M. Pascuzzi, Department of Neurology, Indiana University–Purdue University,  
18  
19 Indianapolis  
20

21  
22 Mamatha Pasnoor, Department of Neurology, University of Kansas Medical Center,  
23  
24 Kansas City  
25

26  
27 Alan Pestronk, Department of Neurology, Washington University School of Medicine, St  
28  
29 Louis, Missouri  
30

31  
32 Carlo Provenzano, Institute of General Pathology, Catholic University, Fondazione  
33  
34 Policlinico Universitario "A. Gemelli" - I.R.C.C.S, Rome, Italy.  
35

36  
37 Roberta Ricciardi, Department of Neuroscience, Cisanello Hospital, University of Pisa,  
38  
39 Pisa, Italy  
40

41  
42 David P. Richman, Department of Neurology, University of California, Davis  
43

44  
45 Julie Rowin, APAC Centers for Pain Management Wellness and Integrative Neurology  
46  
47 Westchester, Illinois  
48

49  
50 Donald B. Sanders, Department of Neurology, Duke University Medical Center,  
51  
52 Durham, North Carolina  
53

54  
55 Zaeem Siddiqi, Department of Medicine, University of Alberta Hospital, Edmonton,  
56  
57 Alberta, Canada  
58  
59

1  
2  
3 Aimee Soloway, Department of Medicine, University of Alberta Hospital, Edmonton,  
4  
5 Alberta, Canada  
6

7  
8 Gil I. Wolfe, Department of Neurology, University at Buffalo Jacobs SMBS, State  
9  
10 University of New York, Buffalo  
11

12  
13 Charlie Wulf, Department of Neurology, Washington University School of Medicine, St  
14  
15 Louis, Missouri  
16

17  
18 Daniel Drachman, Department of Neurology, Johns Hopkins School of Medicine,  
19  
20 Baltimore, Maryland  
21

22  
23 Bryan J. Traynor, Neuromuscular Diseases Research Unit, Laboratory of  
24  
25 Neurogenetics, National Institute on Aging, National Institutes of Health, Porter  
26  
27 Neuroscience Research Center, Bethesda, Maryland  
28  
29

30  
31 **Corresponding Author:**  
32

33 Bryan J. Traynor MD PhD,  
34

35 35 Convent Drive, Room 1A-213, Bethesda, MD 20892-3707.  
36

37 *Phone:* 301-451-7606.  
38

39  
40 traynorb@mail.nih.gov  
41  
42  
43

44  
45 **Author Contact Information:**  
46

47 Joshua D. Green josh.green@nih.gov  
48

49 Richard J. Barohn rbarohn@kumc.edu  
50

51 Emanuela Bartoccion ebartoc@gmail.com  
52

53  
54 Michael Benetar MBenatar@med.miami.edu  
55  
56  
57  
58  
59  
60

1  
2  
3 Derrick Blackmore dblackmo@ualberta.ca  
4  
5 Vinay Chaudhry vchaudh@jhmi.edu  
6  
7 Manisha Chopra chopram@neurology.unc.edu  
8  
9  
10 Andrea Corse acorse@jhmi.edu  
11  
12 Mazen M. Dimachkie mdimachkie@kumc.edu  
13  
14 Amelia Evoli amelia.evoli@unicatt.it  
15  
16  
17 Julaine Florence florencej@neuro.wustl.edu  
18  
19 Miriam Freimer miriam.freimer@osumc.edu  
20  
21 James F. Howard Jr howardj@neurology.unc.edu  
22  
23  
24 Theresa Jiwa theresajiwa@shaw.ca  
25  
26 Henry J. Kaminski henrykaminski@gmail.com  
27  
28 John Kissel John.Kissel@osumc.edu  
29  
30  
31 Wilma J. Koopman wkoopman@uwo.ca  
32  
33 Bernadette Lipscomb btlipscomb@gmail.com  
34  
35 Michelangelo Maestri michelangelo.mvg@tin.it  
36  
37 Mariapaola Marino mariapaola.marino@unicatt.it  
38  
39  
40 Janice M. Massey masse005@mc.duke.edu  
41  
42 April McVey aprillynnmcvey@gmail.com  
43  
44 Michelle M. Mezei mezei@mail.ubc.ca  
45  
46 Srikanth Muppidi muppidis@stanford.edu  
47  
48  
49 Michael W. Nicolle mnicolle@uwo.ca  
50  
51 Joel Oger joel.oger@ubc.ca  
52  
53 Robert M. Pascuzzi rpascuzz@iupui.edu  
54  
55  
56  
57  
58  
59  
60

1  
2  
3 Mamatha Pasnoor mpasnoor@kumc.edu  
4

5 Alan Pestronk pestronka@neuro.wustl.edu  
6

7 Carlo Provenzano carlo.provenzano@unicatt.it  
8

9  
10 Roberta Ricciardi r.ricciardi@ao-pisa.toscana.it  
11

12 David P. Richman dprichman@ucdavis.edu  
13

14 Julie Rowin jrowin@apacgroupe.com  
15

16 Donald B. Sanders sande007@mc.duke.edu  
17

18 Zaeem Siddiqi zsiddiqi@ualberta.ca  
19

20 Aimee Soloway Aimee.Soloway@albertahealthservices.ca  
21

22 Gil I. Wolfe gilwolfe@buffalo.edu  
23

24 Charlie Wulf wulfc@neuro.wustl.edu  
25

26 Daniel Drachman dandrac@aol.com  
27

28 Bryan J. Traynor traynorb@mail.nih.gov  
29  
30  
31  
32  
33  
34

35 Submission Type: **Original Research**  
36

37 Title Character count: **136**  
38

39 Number of Tables: **3**  
40

41 Number of Figures: **2**  
42

43 Number of References: **23**  
44

45 Word count of Abstract: **169**  
46

47 Word count of Paper: **2097**  
48  
49  
50  
51  
52  
53  
54  
55  
56  
57  
58  
59  
60



1  
2  
3 **Statistical analysis:** conducted by Joshua Green, BS, and Dr. Bryan Traynor, MD,  
4  
5 PhD, National Institutes of Health.  
6  
7  
8  
9  
10  
11  
12  
13  
14  
15  
16

## 17 **ABSTRACT**

18  
19 **Objectives** To approximate the rate of familial myasthenia gravis and the coexistence  
20  
21 of other autoimmune disorders in the patients and their families.  
22

23  
24 **Design** Retrospective cohort study  
25

26 **Setting** Clinics across North America  
27

28 **Participants** The study included 1,032 patients diagnosed with acetylcholine receptor  
29  
30 antibody (AChR)-positive myasthenia gravis  
31

32  
33 **Methods** Phenotype information of 1,032 patients diagnosed with acetylcholine  
34  
35 receptor antibody (AChR)-positive myasthenia gravis was obtained from clinics at  
36  
37 fourteen centers across North America between January 2010 and January 2011. A  
38  
39 critical review of the epidemiological literature on the familial rate of myasthenia gravis  
40  
41 was also performed.  
42  
43

44 **Results** Among 1,032 patients, 58 (5.6%) reported a family history of myasthenia  
45  
46 gravis. A history of autoimmune diseases was present in 26.6% of patients and in  
47  
48 28.4% of their family members.  
49

50  
51 **Discussion** The familial rate of myasthenia gravis was higher than would be expected  
52  
53 for a sporadic disease. Furthermore, a high proportion of patients had a personal or  
54  
55  
56  
57  
58  
59  
60

1  
2  
3 family history of autoimmune disease. Taken together, these findings suggest a genetic  
4  
5 contribution to the pathogenesis of myasthenia gravis.  
6  
7  
8  
9  
10

## 11 12 **ARTICLE SUMMARY**

### 13 14 **Strengths and limitations of this study**

- 15  
16  
17 • A strength of this study is that it analyzes a large cohort of myasthenia gravis  
18 patients with complete data on each patient, allowing multiple clinical correlations  
19 to be made.  
20  
21
- 22  
23  
24 • A strength of this study is that standardized criteria were used to diagnose  
25 patients with myasthenia gravis, including establishing the specific subtype of the  
26 disease for each patient.  
27  
28
- 29  
30  
31 • A strength of this study is that the cohort of myasthenia gravis patients was  
32 sufficiently large to allow the generation of evidence confirming a genetic  
33 contribution to the disease.  
34  
35
- 36  
37  
38 • A limitation of this study is the reliance on self-reported family history status for  
39 both myasthenia gravis and other autoimmune diseases by the patients.  
40  
41
- 42  
43 • A limitation of this study is its retrospective design, which precludes ascertaining  
44 additional information from individual patients.  
45  
46  
47  
48  
49  
50  
51  
52  
53  
54  
55  
56  
57  
58  
59  
60

## INTRODUCTION

Myasthenia gravis is a rare autoimmune disease that is characterized by antibody-mediated interference with neuromuscular transmission at the neuromuscular junction. Originally, the role for an autoimmune attack against the acetylcholine receptor (AChR) on the postsynaptic side of the neuromuscular junction was recognized.<sup>1</sup> However, over the past decade, additional autoimmune targets have been identified: muscle-specific tyrosine kinase (MuSK), agrin, and lipoprotein receptor-related protein 4 (LRP4).<sup>2-4</sup> All of these proteins play essential roles in maintaining the structure and function of the neuromuscular junction.

Myasthenia gravis manifests clinically with muscle weakness and fatigability. Symptoms of ocular muscle weakness are observed early in 85% of myasthenic patients.<sup>5</sup> These symptoms include diplopia and/or ptosis. Weakness of the bulbar musculature is observed in 60% of myasthenic patients, with symptoms including dysarthria and/or dysphagia.<sup>5</sup>

A recent literature review of thirty-one epidemiological studies suggests that the annual incidence of myasthenia gravis may range between 3 and 30 cases per million people.<sup>6</sup> A common theme among myasthenia gravis epidemiological studies is that there is a significant degree of variability between cohorts. For example, a study of a Hong Kong Chinese cohort reported an incidence of 4 per million people per year, whereas a study of an English cohort reported an incidence of 30 per million people per year.<sup>7, 8</sup> This substantial degree of variability may be the result of inconsistent diagnostic criteria, varying case ascertainment, lack of physician awareness concerning myasthenia gravis, or it may reflect different occurrence across populations.

1  
2  
3 Historically, adult-onset myasthenia gravis has been regarded as a sporadic  
4 disease with only a minimal genetic component.<sup>9</sup> However, genome-wide association  
5 studies, fine-mapping studies, and epidemiological studies of myasthenia gravis  
6 suggest a genetic contribution to the disease.<sup>10, 11</sup> In fact, studies have described  
7 myasthenic patients with a family history of myasthenia gravis and/or a family history of  
8 autoimmune diseases.<sup>12-16</sup> In this study, we performed a literature search of the familial  
9 rate reported by myasthenia gravis epidemiological studies and, using our cohort of  
10 1,032 North American myasthenia gravis patients, approximated the prevalence of  
11 familial myasthenia gravis, compared the characteristics of familial disease with  
12 sporadic disease, and assessed the co-morbidity of other autoimmune diseases among  
13 patients and among their families.  
14  
15  
16  
17  
18  
19  
20  
21  
22  
23  
24  
25  
26  
27  
28  
29  
30

## 31 **METHODS**

### 32 **Patient ascertainment**

33 Phenotype information of 1,032 patients diagnosed with myasthenia gravis was  
34 obtained from myasthenia gravis clinics at fourteen centers across North America  
35 between January 2010 and January 2011.<sup>10</sup> The numbers of myasthenia gravis patients  
36 attending each of these clinics was not available for this study. Patients were diagnosed  
37 by neurologists specializing in myasthenia gravis. Each myasthenia gravis diagnosis  
38 was based on standard clinical criteria that included, but was not limited to, weakness,  
39 fatigability, and electrophysiological, pharmacological (edrophonium test) and/or  
40 serological abnormalities. Inclusion criteria for this study were as follows: confirmed  
41 diagnosis of myasthenia gravis, non-Hispanic white ethnicity, and presence of anti-  
42  
43  
44  
45  
46  
47  
48  
49  
50  
51  
52  
53  
54  
55  
56  
57  
58  
59  
60

1  
2  
3 AChR antibodies. Patients with anti-MuSK antibodies were excluded from the study.  
4  
5 The LRP4 antibody was discovered after the collection of the cohort was complete.  
6  
7 Thus, the LRP4 antibody status of the patients was not known. Family histories of  
8  
9 myasthenia gravis and other autoimmune diseases were systematically obtained for  
10  
11 each subject using a simple structured questionnaire (Table S1). A positive family  
12  
13 history was defined as having a first-degree (~50% of DNA in common), second-degree  
14  
15 (~25% of DNA in common), or third-degree (~12.5% of DNA in common) relative with  
16  
17 the disease. DNA samples were collected from each subject and used for genetic  
18  
19 analyses as previously reported.<sup>10</sup> Patients with genetic forms of myasthenia gravis  
20  
21 were not explicitly excluded, though none of the cohort was known to have such a  
22  
23 mutation.  
24  
25  
26  
27  
28  
29  
30

### 31 **Literature review methodology**

32  
33 To find studies about the epidemiology of familial myasthenia gravis, the PubMed and  
34  
35 Medline databases were searched using permutations of search terms: 'epidemiology of  
36  
37 familial myasthenia gravis', 'epidemiology of myasthenia gravis', and 'heritability of  
38  
39 myasthenia gravis'. After reviewing thirty-one epidemiology studies between the years  
40  
41 of 1950 through 2018, only ten studies explicitly referenced the family history of  
42  
43 myasthenic patients. Five of those papers provided metrics about family members with  
44  
45 myasthenia gravis.<sup>12-16</sup>  
46  
47  
48  
49  
50

### 51 **Patient and public involvement statement**

52  
53 No patients or members of the public were actively involved with co-producing the  
54  
55  
56  
57  
58  
59  
60

1  
2  
3 research presented in this article.  
4  
5  
6  
7

### 8 **Statement of ethics approval**

9  
10 Written informed consent was obtained from all patients who participated in this study.

11  
12 Institution review board (IRB) approval was obtained at all participating institutions.

13  
14 Lead institutes for IRB = National Institutes of Health, protocol 03-AG-N329,

15  
16 <https://clinicaltrials.gov/ct2/show/NCT02014246>  
17  
18  
19  
20

### 21 **Data availability**

22  
23 The data, consisting of patient family history of myasthenia gravis and other  
24  
25 autoimmune diseases in addition to patient personal history of other autoimmune  
26  
27 diseases, are not publicly available because of patient privacy concerns but de-  
28  
29 identified participant data are available upon request by contacting the corresponding  
30  
31 author. In the interests of scientific rigor, the code used for analysis of the dataset is  
32  
33 available on GitHub: <https://github.com/neurogenetics/Familial-Myasthenia-Gravis>.  
34  
35  
36  
37  
38  
39

## 40 **RESULTS**

### 41 **North American cohort of myasthenia gravis patients**

42  
43 Clinical data were collected from a total of 1,032 patients across fourteen centers in  
44  
45 North America and were analyzed in this study. All of the patients had positive anti-  
46  
47 AChR antibodies. The median age of symptom onset in this clinic-based cohort was 58  
48  
49 years of age (range = 4-91; median onset age for females = 46; median onset age for  
50  
51 males = 62). The female-to-male ratio was 1:1.27. Early-onset disease (< 40 years of  
52  
53  
54  
55  
56  
57  
58  
59  
60

1  
2  
3 age) was observed among 248 (24.0%) of the cohort. Consistent with other reports,  
4  
5 nearly one third of the patients in our North American study cohort (305, 29.6%) had  
6  
7 undergone thymectomy.  
8  
9

10 Fifty-eight (5.6%) patients had a family history of myasthenia gravis. Sibling-  
11  
12 sibling (31.0%) and parent-child (32.8%) were the most common type of familial  
13  
14 relationship, followed by uncle/aunt-nephew/niece (13.8%), cousin-cousin (12.1%) and  
15  
16 grandparent-grandchild (5.2%) relationships. Of note, the indicated percentage of  
17  
18 parent-child cases might be inflated because neonatal myasthenia gravis cases (which  
19  
20 are not believed to be genetic) could not be discerned from non-neonatal cases. Age at  
21  
22 symptom onset was similar among patients with a family history compared to patients  
23  
24 without a family history (57.5 years of age, range = 8-80 years versus 58.5 years, range  
25  
26 = 4-91 years, p-value = 0.183, Wilcoxon rank sum test, figure 1, table 1).  
27  
28  
29  
30  
31  
32  
33  
34  
35  
36  
37  
38  
39  
40  
41  
42  
43  
44  
45  
46  
47  
48  
49  
50  
51  
52  
53  
54  
55  
56  
57  
58  
59  
60

**Table 1.** Comparison of familial and sporadic cases among a cohort of patients diagnosed with myasthenia gravis (n = 1,032)

|                                                                              | <b>Familial</b> | <b>Sporadic</b> | <b>P-value</b> |
|------------------------------------------------------------------------------|-----------------|-----------------|----------------|
| <b>Number of myasthenia gravis cases (percent)</b>                           | 58 (5.6)        | 974 (94.4)      | -              |
| <b>Median age of disease onset (years) (range)</b>                           | 57.5 (8-80)     | 58.5 (4-91)     | 0.183          |
| <b>Number of patients with early-onset disease (&lt; 40 years) (percent)</b> | 15 (25.9)       | 233 (23.9)      | 0.86           |
| <b>Number of females (percent)</b>                                           | 25 (43.1)       | 429 (44.0)      | 0.997          |

A personal history of an autoimmune disease other than myasthenia gravis was reported in 275 (26.6%) of study participants. A total of 293 (28.4%) subjects had a family history of an autoimmune disease. The prevalence of autoimmunity in the general population is ~3-9%, indicating that the rates observed among our myasthenia gravis subjects are significantly increased.<sup>17</sup> A breakdown of the specific autoimmune diseases



1  
2  
3 for both personal history and family history of disease is shown in figure 2A and figure  
4  
5 2B.  
6

7  
8 The most common autoimmune diseases present concomitantly in myasthenia  
9  
10 gravis patients were thyroid disease (n = 118, 11.4%), hematological disease (n = 33,  
11  
12 3.2% consisting of autoimmune hemolytic anemia and autoimmune thrombocytopenic  
13  
14 purpura), and rheumatoid arthritis (n=28, 2.7%). This was similar to the rates previously  
15  
16 reported by Mao et al (figure 2C).<sup>18</sup>  
17  
18

19 The three most common autoimmune diseases present in the families of  
20  
21 myasthenia gravis patients were thyroid disease (n=98, 9.5%), rheumatoid arthritis  
22  
23 (n=68, 6.6%), and type 1 diabetes (n=36, 3.5%).  
24  
25  
26  
27

## 28 **Literature review**

29  
30 Literature review concerning the epidemiology of familial myasthenia gravis identified  
31  
32 five studies that discussed the patient's family history of myasthenia gravis with sample  
33  
34 sizes that ranged from 264 to 6,638 (table 2).<sup>12-16</sup> The frequency of familial myasthenia  
35  
36 gravis ranged from 0.2% to 7.2% across studies, the upper limit having been reported  
37  
38 based on a Finnish cohort.<sup>15</sup> Among these, three studies reported that familial  
39  
40 myasthenia gravis cases had an earlier symptom onset age than the sporadic cases.<sup>12,</sup>  
41  
42  
43  
44  
45  
46  
47  
48  
49  
50  
51  
52  
53  
54  
55  
56  
57  
58  
59  
60  
14, 15 Only three studies reported on the patient history of other autoimmune diseases  
and/or on the family history of other autoimmune diseases.<sup>12, 14, 15</sup> Among these, thyroid  
disease, rheumatoid arthritis, systemic lupus erythematosus, and Sjogren's syndrome  
were the most common other autoimmune diseases reported in patients' personal  
and/or family histories. <sup>12, 14, 15</sup>

**Table 2.** Studies reporting the rate of familial disease in myasthenia gravis.

| Source | Origin        | Sample size | Familial rate | Study type |
|--------|---------------|-------------|---------------|------------|
| 12     | Taiwan        | 6,638       | 0.2%          | Population |
| 13     | Japan         | 3,141       | 0.7%          | Population |
| 14     | Spain         | 462         | 3.5%          | Clinic     |
| 15     | Finland       | 264         | 7.2%          | Population |
| 16     | United States | 702         | 3.8%          | Clinic     |

## DISCUSSION

We found the prevalence of familial myasthenia gravis in our North American cohort to be 5.6%. Our previous genetic analysis of this cohort showed the heritability of myasthenia gravis to be 25.5%.<sup>10</sup> This is comparable to the prevalence reported in other studies, where the frequency ranged from 0.2% to 7.2% of myasthenia gravis patients having a family history of myasthenia gravis depending on the cohort studied.<sup>12-16</sup>

Although the vast majority of myasthenia gravis cases are still non-familial, a prevalence of 5.6% represents a several hundred-fold increase for a disease with an overall prevalence of 1 in 5-10,000.<sup>5</sup> The two studies of myasthenia gravis based on Asian

1  
2  
3 cohorts reported substantially lower rates of familial disease compared to our North  
4 American cohort and other European cohorts. For example, two studies of Taiwanese  
5 (n = 6,638) and Japanese (n = 3,141) cohorts reported rates of familial myasthenia  
6 gravis at 0.2% and 0.7%, respectively.<sup>12-13</sup> Three studies of Spanish, American, and  
7 Finnish cohorts reported rates of 3.5%, 3.8%, and 7.2% (table 2).<sup>14-16</sup> The familial rates  
8 reported in our cohort of over 1,000 patients were, as expected, closer in value to the  
9 rates reported among European and American cohorts. Overall, these data suggest that  
10 there is population variation in the inheritance of myasthenia gravis that warrants further  
11 study to identify the genetic contribution to disease risk.  
12  
13  
14  
15  
16  
17  
18  
19  
20  
21  
22  
23

24 A notable feature of our cohort is that males had a slightly higher prevalence of  
25 familial myasthenia gravis compared to the females (1:1.32), suggesting that there  
26 might be sex-specific differences in the occurrence of familial versus sporadic disease.  
27 This observation may reflect the different age distribution of myasthenia gravis cases in  
28 males versus females observed across all myasthenia gravis cases. The reason for this  
29 is unclear, though we note that our previous genome-wide association study of  
30 myasthenia gravis indicated that the genetic architecture was different among younger  
31 and older age groups.<sup>10</sup>  
32  
33  
34  
35  
36  
37  
38  
39  
40  
41

42 Myasthenia gravis is an immunological disorder and, generally speaking,  
43 autoimmune diseases are known to have heritable components.<sup>19</sup> Likewise,  
44 approximately one-third of our cohort had a personal history and/or a family history of  
45 another autoimmune disease, which is much higher than the prevalence of 3-9%, which  
46 has been historically reported in the general population.<sup>17</sup> We found that 19% (11/58) of  
47 the familial myasthenia gravis cases also had a personal history of autoimmune  
48  
49  
50  
51  
52  
53  
54  
55  
56  
57  
58  
59  
60

1  
2  
3 diseases; this was more than the sporadic myasthenia gravis cases in which only 10%  
4  
5 (98/974) had a personal history of autoimmune diseases. Similar to previous reports, we  
6  
7 found thyroid disease, rheumatoid arthritis, systemic lupus erythematosus, and type 1  
8  
9 diabetes to be the most commonly identified comorbidities (figure 2C).<sup>18, 19</sup> Interestingly,  
10  
11 the frequency of thyroid disease in this cohort (11.4%) is similar to the frequency range  
12  
13 of thyroid disease reported in a study by Kiessling et al.<sup>20</sup> The increased prevalence of  
14  
15 familial myasthenia gravis and increased prevalence of other autoimmune disorders  
16  
17 both suggest that these autoimmune diseases may share a common predisposition that  
18  
19 may be genetic in origin. We speculate that the link between thyroid disease and  
20  
21 myasthenia gravis may be due to a common genetic background or an immunological  
22  
23 cross-reactivity against epitopes or auto-antigens shared by the thyroid and other  
24  
25 tissues relevant to myasthenia gravis.<sup>21,22</sup> Future studies focusing on specific genes and  
26  
27 genomic variants encountered in patients with familial myasthenia gravis offer the  
28  
29 promise to more precisely identify any genetic contributions to the disease.  
30  
31  
32  
33  
34

35 While our study has some notable strengths, it also has an inherent limitation  
36  
37 related to its reliance on self-reported family histories, which could have over- or  
38  
39 underestimated the prevalence of the diseases studied. For example, it is plausible that  
40  
41 a patient could self-report as not having a family history of myasthenia gravis because  
42  
43 the family member was never clinically diagnosed with the disease or did not live long  
44  
45 enough for the disease to manifest. Similarly, other studies have found an  
46  
47 overestimation of some autoimmune diseases, especially thyroid disease and  
48  
49 rheumatoid arthritis, related to self-reporting.<sup>23</sup>  
50  
51  
52  
53

54 Our analyses provide evidence of a genetic contribution to myasthenia gravis  
55  
56  
57  
58  
59  
60

1  
2  
3 based on the higher than expected rate of familial disease observed among our North  
4  
5 American patient cohort, as well as the co-occurrence of autoimmune diseases known  
6  
7 to have a genetic basis among this population. More work needs to be done to further  
8  
9 elucidate the genetic etiology of this archetypal autoimmune disease.  
10  
11  
12  
13  
14  
15  
16  
17  
18

## 19 **ACKNOWLEDGEMENTS**

20  
21 This work was supported in part by the Intramural Research Programs of the National  
22  
23 Institutes of Health National Institute on Aging (Z01-AG000949-02). The work was also  
24  
25 supported by the Myasthenia Gravis Foundation (Drs Drachman and Traynor), a  
26  
27 generous bequest by Geraldine Weinrib, and a gift from Philip Swift. Support was  
28  
29 provided by Mr. and Mrs. Don Brandon and the Department of Neurology, University of  
30  
31 Kansas Medical Center. The funders had no role in the design and conduct of the study;  
32  
33 collection, management, analysis, and interpretation of the data; preparation, review, or  
34  
35 approval of the manuscript; and decision to submit the manuscript for publication. We  
36  
37 thank the patients and research participants who contributed samples for this study.  
38  
39  
40  
41  
42  
43

## 44 **Competing interests**

45  
46 Mr. Green none declared.

47  
48  
49 Dr. Barohn served as a consultant for NuFactor and Momenta Pharmaceutical and  
50  
51 receives research support from PTC Therapeutics, Ra Pharma, Orphazyme, Sanofi  
52  
53 Genzyme, FDA OOPD, NIH, and PCORI.  
54  
55  
56  
57  
58  
59

1  
2  
3 Dr. Bartoccion none declared.  
4

5 Dr. Benetar reports grant support from Muscular Dystrophy Association, ALS  
6 Association, ALS Recovery Fund, Kimmelman Estate, Target ALS, Eli Lilly & Company,  
7 and the National Institutes of Health (NIH) during the conduct of the study. He also  
8 reports grant support from FDA, CDC, and DOD; research support from Alexion  
9 Pharmaceuticals, UCB, Cytokinetics, Neuraltus, Biogen and Orphazyme A/S; and  
10 personal fees from NMD Pharma, Ra Pharmaceuticals, Mitsubishi-Tanabe, Avexis,  
11 UCB and Denali outside the submitted work.  
12  
13  
14  
15  
16  
17  
18  
19  
20

21 Mr. Blackmore none declared  
22

23 Dr. Chaudhry served as a consultant for review and expert testimony for the  
24 Department of Health and Human Services and the Department of Justice under the  
25 Vaccine Injury and Compensation Program. Dr. Chaudhry has received royalty for total  
26 neuropathy score (TNS) patented (through Johns Hopkins University) for license of TNS  
27 use from AstraZeneca, Genentech, Seattle Genetics, Calithera Biosciences, Inc,  
28 Merrimack Pharmaceuticals, Inc., Levicept, and Acetylon Pharmaceuticals, Inc.  
29  
30  
31  
32  
33  
34  
35  
36

37 Dr. Chopra none declared.  
38

39 Dr. Corse none declared.  
40

41 Dr. Dimachkie serves or recently served as a consultant for ArgenX, Catalyst, CSL-  
42 Behring, Kezar, Momenta, NuFactor, RMS Medical, Sanofi Genzyme, Shire Takeda,  
43 and Spark Therapeutics. Dr. Dimachkie received grants from Alexion, Alnylam  
44 Pharmaceuticals, Amicus, Biomarin, Bristol-Myers Squibb, Catalyst, CSL-Behring,  
45 FDA/OOPD, GlaxoSmithKline, Genentech, Grifols, Mitsubishi Tanabe Pharma, MDA,  
46 NIH, Novartis, Sanofi Genzyme, Octapharma, Orphazyme, Sarepta Therapeutics, Shire  
47  
48  
49  
50  
51  
52  
53  
54  
55  
56  
57  
58  
59  
60

1  
2  
3 Takeda, Spark, UCB Biopharma, Viomed & TMA.  
4

5 Dr. Evoli was a member of the advisory board for Alexion, a scientific award jury  
6  
7 member for Grifols and safety data monitor for UCB.  
8

9  
10 Dr. Florence none declared.  
11

12 Dr. Freimer has received honoraria for serving on advisory boards for ARGNX pharma,  
13  
14 Alexion. Dr. Freimer also has research support from Catalyyst, Ra pharma, Amicus,  
15  
16 Orphazyme, Alexion, Momenta and Alnylum.  
17

18  
19 Dr. Howard reports research support and grants from Alexion Pharmaceuticals, argenx  
20  
21 BVBA, Centers for Disease Control and Prevention, Muscular Dystrophy Association,  
22  
23 NIH (including the National Institute of Neurologic Disorders and Stroke and the  
24  
25 National Institute of Arthritis and Musculoskeletal and Skin Disease), PCORI (Patient-  
26  
27 Centered Outcomes Research Institute), and Ra Pharmaceuticals; and nonfinancial  
28  
29 support from Alexion Pharmaceuticals, argenx BVBA, Ra Pharmaceuticals, and  
30  
31 Toleranzia.  
32  
33

34  
35 Dr. Jiwa none declared.  
36

37  
38 Dr. Kaminski is funded by the Muscular Dystrophy Association (508240) and by NIH  
39  
40 grant U54NS115054; is a consultant for Alnylam Pharmaceuticals, Ra Pharmaceuticals,  
41  
42 and UCB Pharmaceuticals; and is CEO of ARC Biotechnology, LLC, which receives  
43  
44 support from the NIH (R41NS110331). He serves on the Editorial Board of Experimental  
45  
46 Neurology.  
47

48  
49 Dr. Kissel none declared.  
50

51  
52 Ms. Koopman none declared.  
53

54  
55 Ms. Lipscomb none declared.  
56  
57  
58  
59  
60

1  
2  
3 Dr. Maestri none declared.  
4

5 Dr. Marino none declared.  
6

7 Dr. Massey none declared  
8

9  
10 Dr. McVey none declared.  
11

12 Dr. Mezei has received honoraria as a speaker and/or moderator from Alnylam, Akcea,  
13  
14 Pfizer and CSL Behring. She has served on Advisory Boards for Pfizer, Alnylam and  
15  
16 Akcea. She serves as an investigator for clinical trials with Alnylam and Biogen.  
17

18  
19 Dr. Muppidi has served on advisory board meetings for Alexion and argenx.  
20

21 Dr. Nicolle none declared.  
22

23  
24 Dr. Oger none declared.  
25

26 Dr. Pascuzzi none declared.  
27

28 Dr. Pasnoor served on advisory board for CSL Behring, Alexion pharmaceuticals,  
29  
30 Argenx Pharmaceuticals and has been consultant for Momenta Pharmaceuticals.  
31

32  
33 Dr. Pestronk none declared.  
34

35 Dr. Provenzano none declared.  
36

37 Dr. Ricciardi none declared.  
38

39  
40 Dr. Richman receives research funding from a Sponsored Research Agreement from  
41  
42 Cabaletta Bioscience.  
43

44 Dr. Rowin none declared.  
45

46 Dr. Sanders none declared.  
47

48  
49 Dr. Siddiqi none declared.  
50

51 Ms. Soloway none declared  
52

53  
54 Dr. Wolfe none declared.  
55



1  
2  
3 Dr. Wulf none declared.  
4

5 Dr. Drachman none declared.  
6

7 Dr. Traynor holds an American and European Union patent on the clinical testing and  
8 therapeutic intervention for the hexanucleotide repeat expansion of C9orf72. Has  
9 received research grants from The Myasthenia Gravis Foundation, the Robert Packard  
10 Center for ALS Research, the ALS Association (ALSA), the Italian Football Federation  
11 (FIGC), the Center for Disease Control and Prevention (CDC), the Muscular Dystrophy  
12 Association (MDA), Merck Inc., and Microsoft Research. Dr. Traynor receives funding  
13 through the Intramural Research Program at the National Institutes of Health.  
14  
15  
16  
17  
18  
19  
20  
21  
22

### 23 **Funding**

24 Study funding by the National Institutes of Health Intramural Research Program. The  
25 work was also supported by the Myasthenia Gravis Foundation (Drs Drachman and  
26 Traynor), a generous bequest by Geraldine Weinrib, and a gift from Philip Swift. Support  
27 was provided by Mr. and Mrs. Don Brandon and the Department of Neurology,  
28 University of Kansas Medical Center.  
29  
30  
31  
32  
33  
34  
35  
36  
37  
38  
39

### 40 **References**

- 41  
42  
43 1. Fambrough DM, Drachman DB, Satyamurti S. Neuromuscular  
44 junction in myasthenia gravis: decreased acetylcholine receptors. *Science* 1973;  
45 182:293-295.  
46  
47  
48  
49 2. Hoch W, McConville J, Helms S, Newsom-Davis J, Melms A, Vincent A. Auto-  
50 antibodies to the receptor tyrosine kinase MuSK in patients with myasthenia gravis  
51 without acetylcholine receptor antibodies. *Nat Med* 2001;7:365-368.  
52  
53  
54  
55  
56  
57  
58  
59

- 1  
2  
3 3. Gasperi C, Melms A, Schoser B, et al. Anti-agrin autoantibodies in myasthenia  
4  
5  
6  
7  
8  
9  
10  
11  
12  
13  
14  
15  
16  
17  
18  
19  
20  
21  
22  
23  
24  
25  
26  
27  
28  
29  
30  
31  
32  
33  
34  
35  
36  
37  
38  
39  
40  
41  
42  
43  
44  
45  
46  
47  
48  
49  
50  
51  
52  
53  
54  
55  
56  
57  
58  
59  
60  
10 3. Gasperi C, Melms A, Schoser B, et al. Anti-agrin autoantibodies in myasthenia  
11  
12  
13  
14  
15  
16  
17  
18  
19  
20  
21  
22  
23  
24  
25  
26  
27  
28  
29  
30  
31  
32  
33  
34  
35  
36  
37  
38  
39  
40  
41  
42  
43  
44  
45  
46  
47  
48  
49  
50  
51  
52  
53  
54  
55  
56  
57  
58  
59  
60  
4. Higuchi O, Hamuro J, Motomura M, Yamanashi Y. Autoantibodies to low-density  
lipoprotein receptor-related protein 4 in myasthenia gravis. *Ann Neurol* 2011;69:418-  
422.
5. Jayam Trouth A, Dabi A, Solieman N, Kurukumbi M, Kalyanam J. Myasthenia  
gravis: a review. *Autoimmune Dis* 2012;2012:874680.
6. McGrogan A, Sneddon S, de Vries CS. The incidence of myasthenia gravis: a  
systematic literature review. *Neuroepidemiology* 2010;34:171-183.
7. Yu YL, Hawkins BR, Ip MS, Wong V, Woo E. Myasthenia gravis in Hong Kong  
Chinese. 1. Epidemiology and adult disease. *Acta Neurol Scand* 1992;86:113-119.
8. MacDonald BK, Cockerell OC, Sander JW, Shorvon SD. The incidence and  
lifetime prevalence of neurological disorders in a prospective community-based study in  
the UK. *Brain* 2000;123 ( Pt 4):665-676.
9. Spillane J, Higham E, Kullmann DM. Myasthenia gravis. *BMJ* 2012;345:e8497.
10. Renton AE, Pliner HA, Provenzano C, et al. A genome-wide association study of  
myasthenia gravis. *JAMA Neurol* 2015;72:396-404.
11. Giraud M, Vandiedonck C, Garchon HJ. Genetic factors in autoimmune  
myasthenia gravis. *Ann N Y Acad Sci* 2008;1132:180-192.
12. Liu FC, Kuo CF, See LC, Tsai HI, Yu HP. Familial aggregation of myasthenia  
gravis in affected families: a population-based study. *Clin Epidemiol* 2017;9:527-535.
13. Murai H, Yamashita N, Watanabe M, et al. Characteristics of myasthenia gravis  
according to onset-age: Japanese nationwide survey. *J Neurol Sci* 2011;305:97-102.

- 1  
2  
3 14. Salvado M, Canela M, Ponseti JM, et al. Study of the prevalence of familial  
4  
5 autoimmune myasthenia gravis in a Spanish cohort. *J Neurol Sci* 2016;360:110-114.  
6
- 7  
8 15. Pirskanen R. Genetic aspects in myasthenia gravis. A family study of 264 Finnish  
9  
10 patients. *Acta Neurol Scand* 1977;56:365-388.  
11
- 12  
13 16. Namba T, Brunner NG, Brown SB, Muguruma M, Grob D. Familial myasthenia  
14  
15 gravis. Report of 27 patients in 12 families and review of 164 patients in 73 families.  
16  
17 *Arch Neurol* 1971;25:49-60.  
18
- 19  
20 17. Cooper GS, Bynum ML, Somers EC. Recent insights in the epidemiology of  
21  
22 autoimmune diseases: improved prevalence estimates and understanding of clustering  
23  
24 of diseases. *J Autoimmun* 2009;33:197-207.  
25
- 26  
27 18. Mao ZF, Yang LX, Mo XA, et al. Frequency of autoimmune diseases in  
28  
29 myasthenia gravis: a systematic review. *Int J Neurosci* 2011;121:121-129.  
30
- 31  
32 19. Ceccarelli F, Agmon-Levin N, Perricone C. Genetic Factors of Autoimmune  
33  
34 Diseases. *J Immunol Res* 2016;2016:1-2.  
35
- 36  
37 20. Kiessling WR, Finke R, Kotulla P, Schleusener H. Circulating TSH-binding  
38  
39 inhibiting immunoglobulins in myasthenia gravis. *Acta Endocrinol (Copenh)*  
40  
41 1982;101:41-46.  
42
- 43  
44 21. Marino M, Ricciardi R, Pinchera A, Barbesino G, Manetti L, Chiovato L,  
45  
46 Braverman LE, Rossi B, Muratorio A, Mariotti S., Mild Clinical Expression of Myasthenia  
47  
48 Gravis Associated With Auto-immune Thyroid Diseases. *J Clin Endocrinol Metab.*  
49  
50 1997;82:438-443. doi: 10.1210/jc.82.2.438  
51  
52  
53  
54  
55  
56  
57  
58  
59  
60

- 1  
2  
3 22. Masood I., Yasir M., Kudyar RP., Autoimmune thyroid disease with myasthenia  
4 gravis in a 28-year-old male: a case report. *Cases J.*, 2007;2:8766. doi: 10.4076/1757-  
5 1626-2-8766  
6  
7  
8  
9  
10 23. O'Rourke JA, Ravichandran C, Howe YJ, Mullett JE, Keary CJ, Golas SB,  
11 Hureau AR, McCormick M, Chung J, Rose NR, McDougale CJ. Accuracy of self-reported  
12 history of autoimmune disease: A pilot study. *PLoS ONE* 2019;14(5): e0216526  
13  
14  
15  
16  
17  
18  
19  
20  
21  
22  
23  
24  
25  
26  
27  
28  
29  
30  
31  
32  
33  
34  
35  
36  
37  
38  
39  
40  
41  
42  
43  
44  
45  
46  
47  
48  
49  
50  
51  
52  
53  
54  
55  
56  
57  
58  
59  
60

## Figures

### Figure 1.

Symptom-onset age distribution of sporadic and familial cases. The density represents the relative probability of myasthenia gravis at each age point.

### Figure 2.

Autoimmune diseases in a cohort of 1,032 patients with myasthenia gravis. (A) Occurrence of autoimmune diseases among patients with myasthenia (n = 275). (B) Occurrence of autoimmune diseases among familial relatives of patients with myasthenia gravis (n = 293). (C) Comparisons of autoimmune diseases among patients with myasthenia gravis and among relatives. Size of circles represent the percentage previously reported by Mao et al.<sup>18</sup>

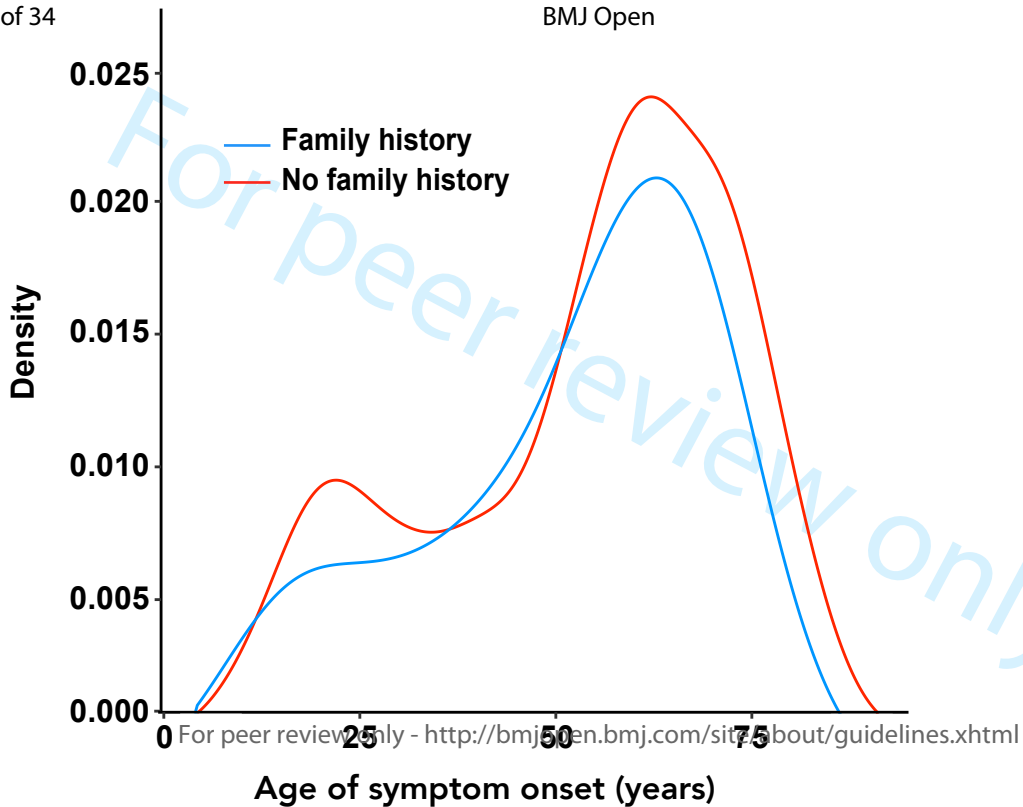

1  
2  
3  
4  
5  
6  
7  
8  
9  
10  
11  
12  
13  
14  
15  
16  
17  
18  
19  
20  
21  
22  
23

# A. Personal history of autoimmune diseases

# B. Family history of autoimmune diseases

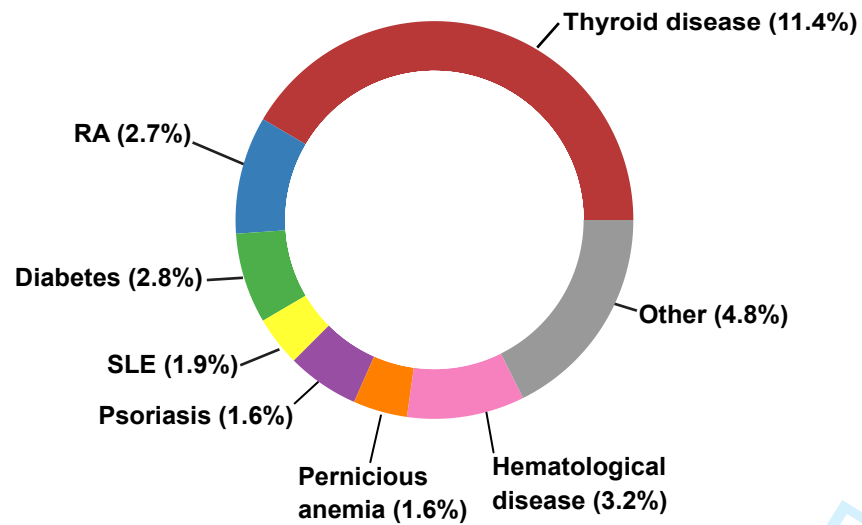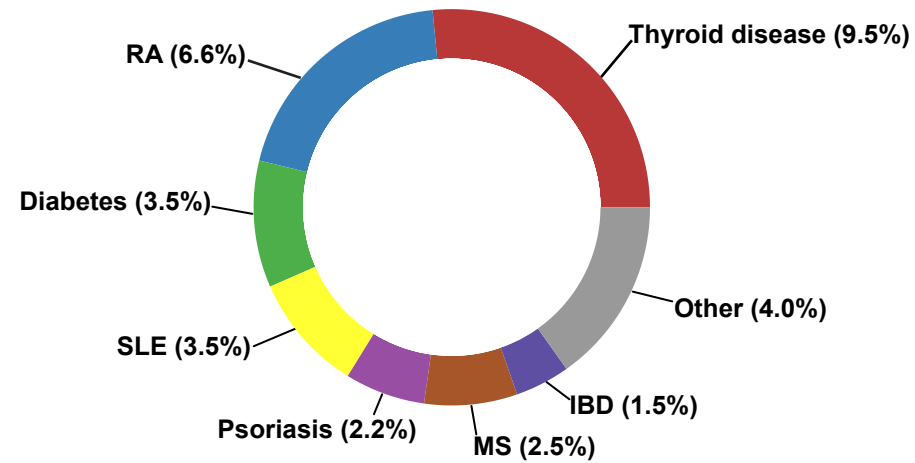

# C. Relationships between personal and family histories of autoimmune diseases

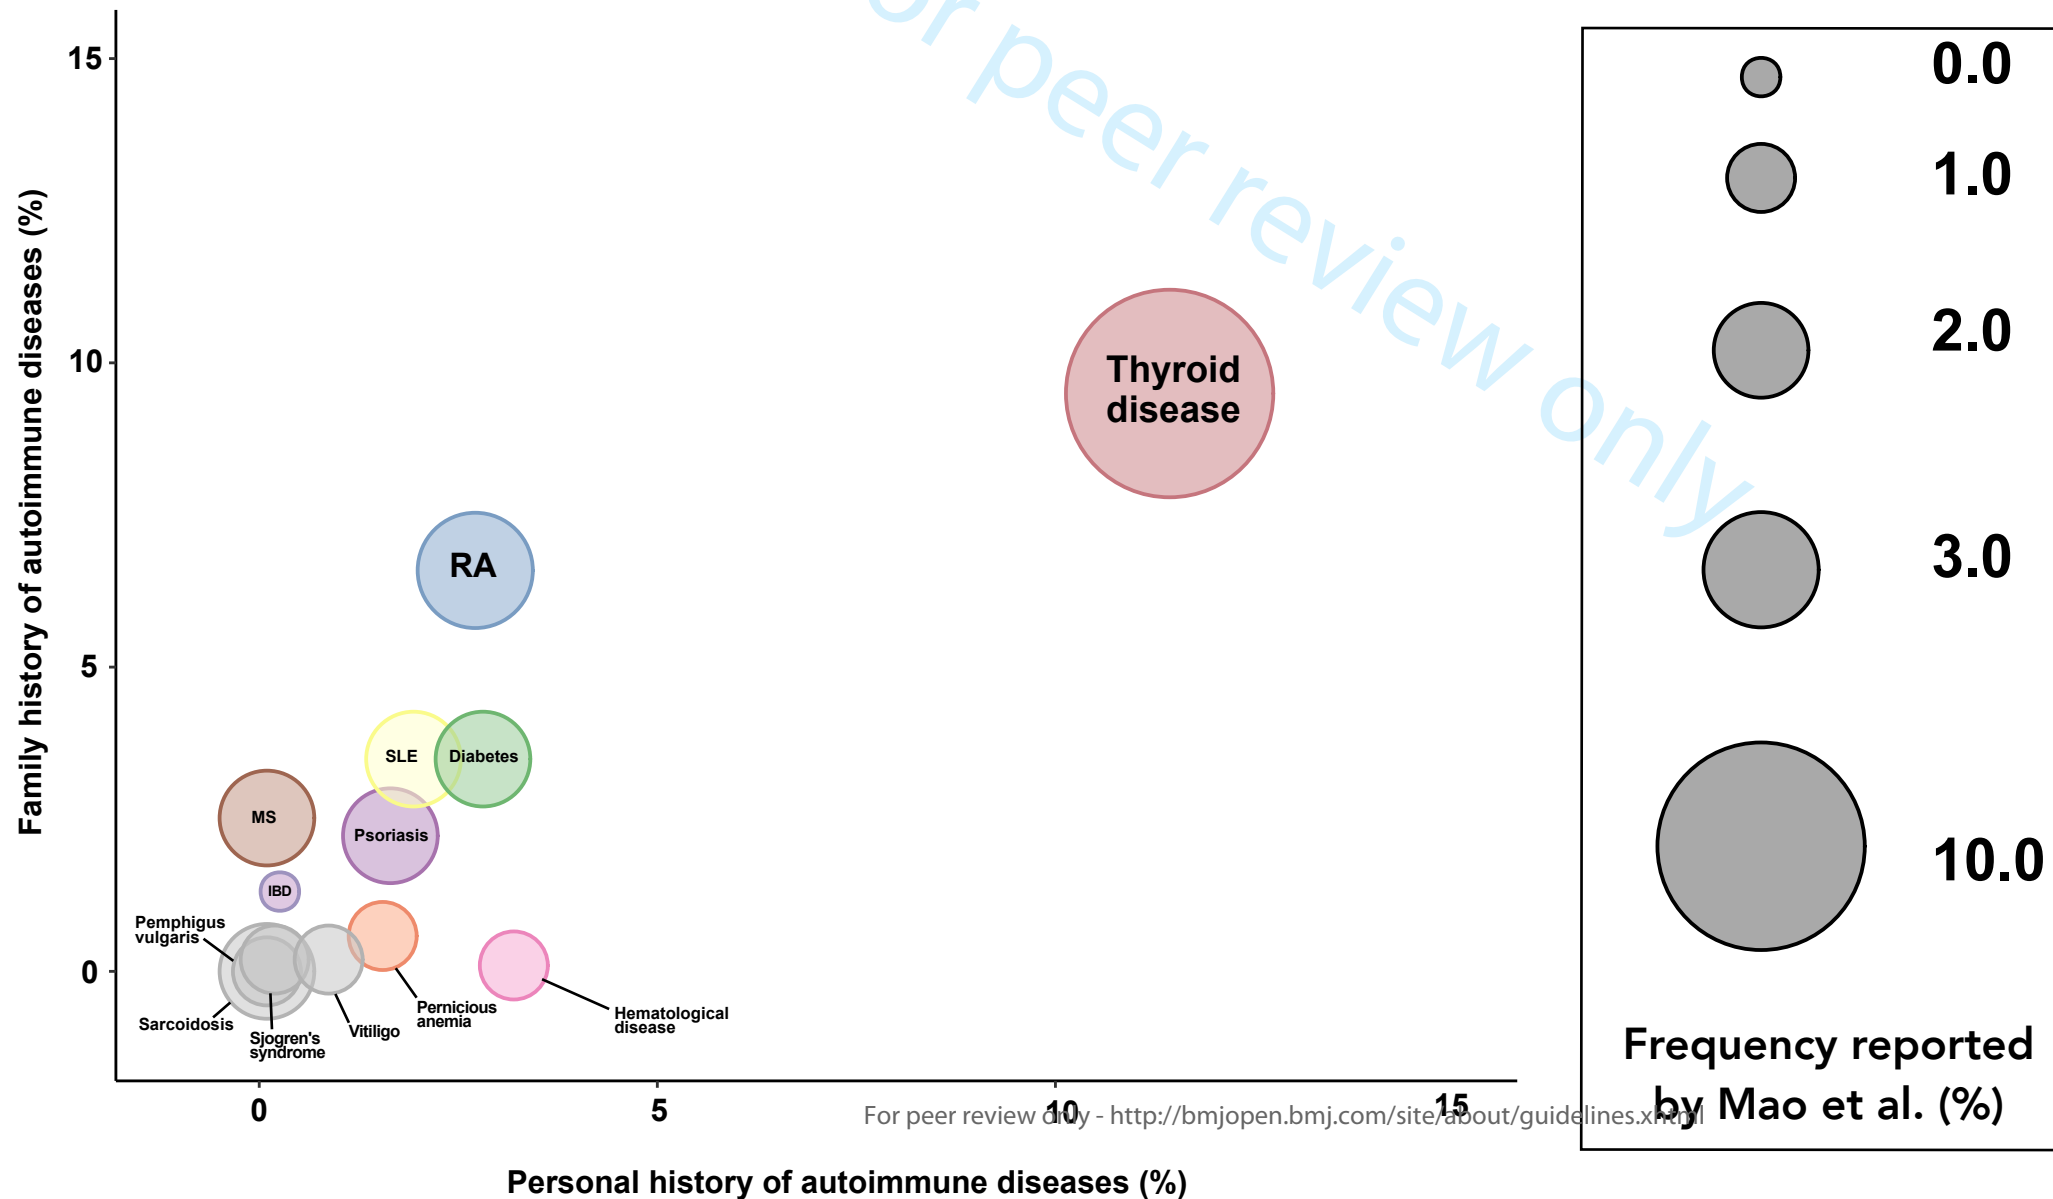

**Table S1.** Questionnaire used to collect demographic and clinical information from patients diagnosed with myasthenia gravis

| Patient Information                  |                                   |
|--------------------------------------|-----------------------------------|
| Patient identification number:       | String (e.g., JHU1, JHU2)         |
| Institution:                         | String (e.g., Johns Hopkins, UWO) |
| Date:                                | Date                              |
| Verified as Caucasian?               | Yes/No                            |
| AChR titer - Initial or 1st known:   | Numeric                           |
| Age at symptom onset (years):        | Numeric                           |
| Gender:                              | Male/Female                       |
| Worst status                         |                                   |
| Diplopia or ptosis only?             | Yes/No                            |
| Mild limb weakness?                  | Yes/No                            |
| Dysphagia dyspnea?                   | Yes/No                            |
| Severe limb weakness?                | Yes/No                            |
| Hospitalized?                        | Yes/No                            |
| Ventilated?                          | Yes/No                            |
| Feeding tube?                        | Yes/No                            |
| Treatment                            |                                   |
| Mestinon?                            | Yes/No                            |
| Benefit: Mestinon:                   | Ordinal scale [0,1,2]             |
| Prednisone?                          | Yes/No                            |
| Benefit: Prednisone:                 | Ordinal scale [0,1,2]             |
| CellCept?                            | Yes/No                            |
| Benefit: CellCept?                   | Ordinal scale [0,1,2]             |
| Cyclosporine?                        | Yes/No                            |
| Benefit: Cyclosporine:               | Ordinal scale [0,1,2]             |
| Tacrolimus?                          | Yes/No                            |
| Benefit: Tacrolimus:                 | Ordinal scale [0,1,2]             |
| Intravenous immunoglobulin?          | Yes/No                            |
| Benefit: Intravenous immunoglobulin: | Ordinal scale [0,1,2]             |
| Plasmapheresis?                      | Yes/No                            |
| Benefit: Plasmapheresis:             | Ordinal scale [0,1,2]             |
| Imuran/Azathioprine?                 | Yes/No                            |
| Benefit: Imuran/Azathioprine:        | Ordinal scale [0,1,2]             |
| Other treatment?                     | Yes/No                            |
| Name of other 1:                     | String (e.g., Mytelase)           |
| Benefit: other 1:                    | Ordinal scale [0,1,2]             |
| Name of other 2:                     | String (e.g., Mytelase)           |
| Benefit: other 2:                    | Ordinal scale [0,1,2]             |



| <b>Best Status</b>                                     |                                         |
|--------------------------------------------------------|-----------------------------------------|
| Back to normal without medication?                     | Yes/No                                  |
| Back to normal with medication?                        | Yes/No                                  |
| Diplopia or ptosis only?                               | Yes/No                                  |
| Mild limb weakness?                                    | Yes/No                                  |
| Dysphagia/dyspnea?                                     | Yes/No                                  |
| Severe limb weakness?                                  | Yes/No                                  |
| Hospitalized?                                          | Yes/No                                  |
| Ventilated?                                            | Yes/No                                  |
| Feeding tube:                                          | Yes/No                                  |
| <b>Other Autoimmune Diseases</b>                       |                                         |
| Other autoimmune disease?                              | Yes/No                                  |
| Thyroiditis?                                           | Yes/No                                  |
| Lupus?                                                 | Yes/No                                  |
| Rheumatoid arthritis?                                  | Yes/No                                  |
| Psoriasis?                                             | Yes/No                                  |
| Blood disease?                                         | Yes/No                                  |
| Other Autoimmune Disease?                              | Yes/No                                  |
| Other Autoimmune Disease (Name1):                      | String (e.g., vitiligo, celiac disease) |
| Other Autoimmune Disease (Name2):                      | String (e.g., vitiligo, celiac disease) |
| Other Autoimmune Disease (Name3):                      | String (e.g., vitiligo, celiac disease) |
| <b>Family history of myasthenia gravis</b>             |                                         |
| Family history of myasthenia gravis?                   | Yes/No                                  |
| Myasthenia gravis (Relationship):                      | String (e.g., mother, sister)           |
| <b>Family history of other Autoimmune Disease</b>      |                                         |
| Family history of other Autoimmune Disease?            | Yes/No                                  |
| Autoimmune Disease (Relationship):                     | String (e.g., mother, sister)           |
| Autoimmune Disease (Disease):                          | String (e.g., polymyalgia, vitiligo)    |
| Family history of other Autoimmune Disease 2nd Member? | Yes/No                                  |
| Autoimmune Disease (Relationship) 2nd Member:          | String (e.g., mother, sister)           |
| Autoimmune Disease (Disease) 2nd Member:               | String (e.g., polymyalgia, vitiligo)    |
| Family history of other Autoimmune Disease 3rd Member? | Yes/No                                  |
| Autoimmune Disease (Relationship) 3rd Member:          | String (e.g., mother, sister)           |
| Autoimmune Disease (Disease) 3rd Member:               | String (e.g., polymyalgia, vitiligo)    |
| Other relative in study?                               | Yes/No                                  |
| Other relative in study id                             | String (e.g., JHU1, JHU2)               |
| Thymectomy?                                            | Yes/No                                  |
| Thymoma?                                               | Yes/No                                  |
| Histology of thymus if known?                          | String (e.g., Follicular Hyperplasia)   |

**STROBE 2007 (v4) Statement—Checklist of items that should be included in reports of cohort studies**

| Section/Topic                | Item # | Recommendation                                                                                                                                                                       | Reported on page # |
|------------------------------|--------|--------------------------------------------------------------------------------------------------------------------------------------------------------------------------------------|--------------------|
| <b>Title and abstract</b>    | 1      | (a) Indicate the study’s design with a commonly used term in the title or the abstract                                                                                               | 1                  |
|                              |        | (b) Provide in the abstract an informative and balanced summary of what was done and what was found                                                                                  | 7-8                |
| <b>Introduction</b>          |        |                                                                                                                                                                                      | <b>10-11</b>       |
| Background/rationale         | 2      | Explain the scientific background and rationale for the investigation being reported                                                                                                 | 10-11              |
| Objectives                   | 3      | State specific objectives, including any prespecified hypotheses                                                                                                                     | 11                 |
| <b>Methods</b>               |        |                                                                                                                                                                                      | <b>11-13</b>       |
| Study design                 | 4      | Present key elements of study design early in the paper                                                                                                                              | 11                 |
| Setting                      | 5      | Describe the setting, locations, and relevant dates, including periods of recruitment, exposure, follow-up, and data collection                                                      | 11-13              |
| Participants                 | 6      | (a) Give the eligibility criteria, and the sources and methods of selection of participants. Describe methods of follow-up                                                           | 11                 |
|                              |        | (b) For matched studies, give matching criteria and number of exposed and unexposed                                                                                                  | NA                 |
| Variables                    | 7      | Clearly define all outcomes, exposures, predictors, potential confounders, and effect modifiers. Give diagnostic criteria, if applicable                                             | 11-13              |
| Data sources/<br>measurement | 8*     | For each variable of interest, give sources of data and details of methods of assessment (measurement). Describe comparability of assessment methods if there is more than one group | 11-13              |
| Bias                         | 9      | Describe any efforts to address potential sources of bias                                                                                                                            | 11-13              |
| Study size                   | 10     | Explain how the study size was arrived at                                                                                                                                            | 11-13              |
| Quantitative variables       | 11     | Explain how quantitative variables were handled in the analyses. If applicable, describe which groupings were chosen and why                                                         | 11-13              |
| Statistical methods          | 12     | (a) Describe all statistical methods, including those used to control for confounding                                                                                                | 14-15              |
|                              |        | (b) Describe any methods used to examine subgroups and interactions                                                                                                                  | 14-15              |
|                              |        | (c) Explain how missing data were addressed                                                                                                                                          | 14-15              |
|                              |        | (d) If applicable, explain how loss to follow-up was addressed                                                                                                                       | 14-15              |
|                              |        | (e) Describe any sensitivity analyses                                                                                                                                                | NA                 |
| <b>Results</b>               |        |                                                                                                                                                                                      | <b>13-15</b>       |

|                          |     |                                                                                                                                                                                                              |         |
|--------------------------|-----|--------------------------------------------------------------------------------------------------------------------------------------------------------------------------------------------------------------|---------|
| Participants             | 13* | (a) Report numbers of individuals at each stage of study—eg numbers potentially eligible, examined for eligibility, confirmed eligible, included in the study, completing follow-up, and analysed            | 7,11,14 |
|                          |     | (b) Give reasons for non-participation at each stage                                                                                                                                                         | NA      |
|                          |     | (c) Consider use of a flow diagram                                                                                                                                                                           | NA      |
| Descriptive data         | 14* | (a) Give characteristics of study participants (eg demographic, clinical, social) and information on exposures and potential confounders                                                                     | 13      |
|                          |     | (b) Indicate number of participants with missing data for each variable of interest                                                                                                                          | NA      |
|                          |     | (c) Summarise follow-up time (eg, average and total amount)                                                                                                                                                  | NA      |
| Outcome data             | 15* | Report numbers of outcome events or summary measures over time                                                                                                                                               | 13-15   |
| Main results             | 16  | (a) Give unadjusted estimates and, if applicable, confounder-adjusted estimates and their precision (eg, 95% confidence interval). Make clear which confounders were adjusted for and why they were included | 13-15   |
|                          |     | (b) Report category boundaries when continuous variables were categorized                                                                                                                                    | 13-15   |
|                          |     | (c) If relevant, consider translating estimates of relative risk into absolute risk for a meaningful time period                                                                                             | NA      |
| Other analyses           | 17  | Report other analyses done—eg analyses of subgroups and interactions, and sensitivity analyses                                                                                                               | 13-15   |
| <b>Discussion</b>        |     |                                                                                                                                                                                                              | 16-18   |
| Key results              | 18  | Summarise key results with reference to study objectives                                                                                                                                                     | 16-18   |
| <b>Limitations</b>       |     |                                                                                                                                                                                                              | 17-18   |
| Interpretation           | 20  | Give a cautious overall interpretation of results considering objectives, limitations, multiplicity of analyses, results from similar studies, and other relevant evidence                                   | 17-18   |
| Generalisability         | 21  | Discuss the generalisability (external validity) of the study results                                                                                                                                        | 17-18   |
| <b>Other information</b> |     |                                                                                                                                                                                                              | NA      |
| Funding                  | 22  | Give the source of funding and the role of the funders for the present study and, if applicable, for the original study on which the present article is based                                                | 23      |

\*Give information separately for cases and controls in case-control studies and, if applicable, for exposed and unexposed groups in cohort and cross-sectional studies.

**Note:** An Explanation and Elaboration article discusses each checklist item and gives methodological background and published examples of transparent reporting. The STROBE checklist is best used in conjunction with this article (freely available on the Web sites of PLoS Medicine at <http://www.plosmedicine.org/>, Annals of Internal Medicine at <http://www.annals.org/>, and Epidemiology at <http://www.epidem.com/>). Information on the STROBE Initiative is available at [www.strobe-statement.org](http://www.strobe-statement.org).
