# Supplementary material for: Epidemiological evidence for a hereditary contribution to myasthenia gravis: a retrospective cohort study of patients from North America
Source: PubMed Central journal article supplement — BMJ Open. 2020 Sep 18;10(9):e037909. doi: 10.1136/bmjopen-2020-037909 (PMC7511637; doi:10.1136/bmjopen-2020-037909), 2020-09-18
Supplement: bmjopen-2020-037909supp001.pdf [file bmjopen-2020-037909supp001.pdf]

**Table S1.** Questionnaire used to collect demographic and clinical information from patients diagnosed with myasthenia gravis

| Patient Information                  |                                   |
|--------------------------------------|-----------------------------------|
| Patient identification number:       | String (e.g., JHU1, JHU2)         |
| Institution:                         | String (e.g., Johns Hopkins, UWO) |
| Date:                                | Date                              |
| Verified as Caucasian?               | Yes/No                            |
| AChR titer - Initial or 1st known:   | Numeric                           |
| Age at symptom onset (years):        | Numeric                           |
| Gender:                              | Male/Female                       |
| Worst status                         |                                   |
| Diplopia or ptosis only?             | Yes/No                            |
| Mild limb weakness?                  | Yes/No                            |
| Dysphagia dyspnea?                   | Yes/No                            |
| Severe limb weakness?                | Yes/No                            |
| Hospitalized?                        | Yes/No                            |
| Ventilated?                          | Yes/No                            |
| Feeding tube?                        | Yes/No                            |
| Treatment                            |                                   |
| Mestinon?                            | Yes/No                            |
| Benefit: Mestinon:                   | Ordinal scale [0,1,2]             |
| Prednisone?                          | Yes/No                            |
| Benefit: Prednisone:                 | Ordinal scale [0,1,2]             |
| CellCept?                            | Yes/No                            |
| Benefit: CellCept?                   | Ordinal scale [0,1,2]             |
| Cyclosporine?                        | Yes/No                            |
| Benefit: Cyclosporine:               | Ordinal scale [0,1,2]             |
| Tacrolimus?                          | Yes/No                            |
| Benefit: Tacrolimus:                 | Ordinal scale [0,1,2]             |
| Intravenous immunoglobulin?          | Yes/No                            |
| Benefit: Intravenous immunoglobulin: | Ordinal scale [0,1,2]             |
| Plasmapheresis?                      | Yes/No                            |
| Benefit: Plasmapheresis:             | Ordinal scale [0,1,2]             |
| Imuran/Azathioprine?                 | Yes/No                            |
| Benefit: Imuran/Azathioprine:        | Ordinal scale [0,1,2]             |
| Other treatment?                     | Yes/No                            |
| Name of other 1:                     | String (e.g., Mytelase)           |
| Benefit: other 1:                    | Ordinal scale [0,1,2]             |
| Name of other 2:                     | String (e.g., Mytelase)           |
| Benefit: other 2:                    | Ordinal scale [0,1,2]             |

| Best Status                                            |                                         |
|--------------------------------------------------------|-----------------------------------------|
| Back to normal without medication?                     | Yes/No                                  |
| Back to normal with medication?                        | Yes/No                                  |
| Diplopia or ptosis only?                               | Yes/No                                  |
| Mild limb weakness?                                    | Yes/No                                  |
| Dysphagia/dyspnea?                                     | Yes/No                                  |
| Severe limb weakness?                                  | Yes/No                                  |
| Hospitalized?                                          | Yes/No                                  |
| Ventilated?                                            | Yes/No                                  |
| Feeding tube:                                          | Yes/No                                  |
| Other Autoimmune Diseases                              |                                         |
| Other autoimmune disease?                              | Yes/No                                  |
| Thyroiditis?                                           | Yes/No                                  |
| Lupus?                                                 | Yes/No                                  |
| Rheumatoid arthritis?                                  | Yes/No                                  |
| Psoriasis?                                             | Yes/No                                  |
| Blood disease?                                         | Yes/No                                  |
| Other Autoimmune Disease?                              | Yes/No                                  |
| Other Autoimmune Disease (Name1):                      | String (e.g., vitiligo, celiac disease) |
| Other Autoimmune Disease (Name2):                      | String (e.g., vitiligo, celiac disease) |
| Other Autoimmune Disease (Name3):                      | String (e.g., vitiligo, celiac disease) |
| Family history of myasthenia gravis                    |                                         |
| Family history of myasthenia gravis?                   | Yes/No                                  |
| Myasthenia gravis (Relationship):                      | String (e.g., mother, sister)           |
| Family history of other Autoimmune Disease             |                                         |
| Family history of other Autoimmune Disease?            | Yes/No                                  |
| Autoimmune Disease (Relationship):                     | String (e.g., mother, sister)           |
| Autoimmune Disease (Disease):                          | String (e.g., polymyalgia, vitiligo)    |
| Family history of other Autoimmune Disease 2nd Member? | Yes/No                                  |
| Autoimmune Disease (Relationship) 2nd Member:          | String (e.g., mother, sister)           |
| Autoimmune Disease (Disease) 2nd Member:               | String (e.g., polymyalgia, vitiligo)    |
| Family history of other Autoimmune Disease 3rd Member? | Yes/No                                  |
| Autoimmune Disease (Relationship) 3rd Member:          | String (e.g., mother, sister)           |
| Autoimmune Disease (Disease) 3rd Member:               | String (e.g., polymyalgia, vitiligo)    |
| Other relative in study?                               | Yes/No                                  |
| Other relative in study id                             | String (e.g., JHU1, JHU2)               |
| Thymectomy?                                            | Yes/No                                  |
| Thymoma?                                               | Yes/No                                  |
| Histology of thymus if known?                          | String (e.g., Follicular Hyperplasia)   |
